# Supplementary material for: Evaluating the effectiveness of the NHS Health Check programme in South England: a quasi-randomised controlled trial
Source: PubMed Central journal article supplement — BMJ Open. 2019 Sep 20;9(9):e029420. doi: 10.1136/bmjopen-2019-029420 (PMC6756325; doi:10.1136/bmjopen-2019-029420), 2019-09-20
Supplement: bmjopen-2019-029420.draft_revisions.pdf [file bmjopen-2019-029420.draft_revisions.pdf]

# BMJ Open

BMJ Open is committed to open peer review. As part of this commitment we make the peer review history of every article we publish publicly available.

When an article is published we post the peer reviewers' comments and the authors' responses online. We also post the versions of the paper that were used during peer review. These are the versions that the peer review comments apply to.

The versions of the paper that follow are the versions that were submitted during the peer review process. They are not the versions of record or the final published versions. They should not be cited or distributed as the published version of this manuscript.

BMJ Open is an open access journal and the full, final, typeset and author-corrected version of record of the manuscript is available on our site with no access controls, subscription charges or pay-per-view fees (<http://bmjopen.bmj.com>).

If you have any questions on BMJ Open's open peer review process please email [info.bmjopen@bmj.com](mailto:info.bmjopen@bmj.com)

# BMJ Open

## NHS Health Checks: a Quasi Randomised Controlled Trial

|                               |                                                                                                                                                                                                                                                                                                                                                 |
|-------------------------------|-------------------------------------------------------------------------------------------------------------------------------------------------------------------------------------------------------------------------------------------------------------------------------------------------------------------------------------------------|
| Journal:                      | <i>BMJ Open</i>                                                                                                                                                                                                                                                                                                                                 |
| Manuscript ID                 | bmjopen-2019-029420                                                                                                                                                                                                                                                                                                                             |
| Article Type:                 | Research                                                                                                                                                                                                                                                                                                                                        |
| Date Submitted by the Author: | 25-Jan-2019                                                                                                                                                                                                                                                                                                                                     |
| Complete List of Authors:     | Kennedy, Oliver; University of Southampton Faculty of Medicine, Su, Fangzhong; NHS South, Central and West Commissioning Support Unit<br>Pears, Robert; Public Health Directorate, Hampshire County Council<br>Walmsley, Emily; University of Southampton Faculty of Medicine<br>Roderick, Paul; University of Southampton, Faculty of Medicine |
| Keywords:                     | health checks, cardiovascular risk management, cardiovascular risk screening, population screening                                                                                                                                                                                                                                              |
|                               |                                                                                                                                                                                                                                                                                                                                                 |

SCHOLARONE™  
Manuscripts

## **NHS Health Checks: a Quasi Randomised Controlled Trial**

O. J. Kennedy<sup>1</sup> \* (0000-0001-7907-9118), F. Su<sup>2</sup>, R. Pears<sup>3</sup>, E Walmsley<sup>1</sup>, P. Roderick<sup>1</sup>

1. Primary Care & Population Sciences Faculty of Medicine, University of Southampton, Southampton, UK

O. J. Kennedy, Visiting Research Fellow

E Walmsley, Public Health Registrar

P. Roderick, Professor of Public Health

2. NHS South, Central and West Commissioning Support Unit, Eastleigh, Hampshire, UK

F. Su, Principal Information Analyst

3. Public Health Directorate, Hampshire County Council, Hampshire, UK

R. Pears, Public Health Consultant

Correspondence to: Oliver Kennedy at Primary Care & Population Sciences, Faculty of Medicine, University of Southampton, Southampton General Hospital, Mailpoint 801, South Academic Block, Tremona Road, Southampton, SO16 6YD (email: [ok4g13@soton.ac.uk](mailto:ok4g13@soton.ac.uk))

Word count: 4710

## **ABSTRACT**

**Objectives:** To evaluate uptake, risk factor detection and management from the National Health Service Health Check (NHS HC) programme.

**Design:** Quasi-randomised controlled trial wherein participants were allocated to five cohorts based on birth year, with four cohorts being invited for an NHS HC between April 2011 and March 2015.

**Setting:** 151 General Practices in Hampshire, England, United Kingdom.

**Participants:** 366,005 participants born 1/4/1940 – 31/3/1976 eligible for an NHS Health Check.

**Intervention:** Invitation for an NHS HC.

**Main outcome measures:** Absolute percentage changes and odds ratios (ORs) of (i) detection of CVD 10-year risk scores >10% and >20%, current smokers, TC >5.5 mmol/L and >7.5 mmol/L; (ii) new diagnoses of hypertension, T2DM, CKD and AF; and (iii) new interventions with statins, antihypertensives, antiglycaemics and nicotine replacement therapy (NRT).

**Results:** HC attendance rose from 12% to 30% between 2011/12 and 2014/15. HC invitation increased detection of CVD risk scores >10% (2.0%-3.6), TC >5.5 mmol/L (4.1%-7.0%) and >7.5 mmol/L (0.3%-0.4%), hypertension diagnoses (0.3%-0.6%), and interventions with statins (0.3%-1.0%) and antihypertensives (0.1%-0.6%). There were no consistent differences in detection of CVD risk >20% or current smokers, NRT, or diagnoses of diabetes, AF or CKD. Multivariate analyses showed associations between HC invitation and detection of CVD risk >10% (OR 8.01, 95% CI 7.34-8.73), >20% (5.86, 4.83-7.10), TC > 5.5 mmol/L (3.72, 3.57-3.89), >7.5 mmol/L (2.89, 2.46-3.38), and diagnoses of hypertension (1.33, 1.20-1.47) and diabetes (1.34, 1.12-1.61). The ORs of CVD risk >10% plus statin or >20% plus statin, respectively, were 2.90 (2.36-3.57) and 2.60 (1.92-3.52), and hypertension plus antihypertensive treatment was 1.33 (1.18-1.50). There were no associations with AF, CKD, antiglycaemics or NRT.

**Conclusions:** HC invitation increases detection of cardiovascular risk factors, but corresponding absolute increases in evidence-based interventions are small.

### **STRENGTHS AND LIMITATIONS OF THIS STUDY**

- This is the first study to investigate outcomes associated with invitation for an NSH Health Check using a quasi-randomised method together with an intention-to-treat analysis.
- This study included a large population of 366,005 participants in a mixture of urban, semi-urban and rural settings.
- Invitation for a Health Check increases detection of cardiovascular risk factors, but this does not translate into corresponding absolute increases in evidence-based interventions.
- The follow-up of 6 months to 3.5 years limited assessment of patient relevant outcomes (e.g. incident cardiovascular disease).
- There was insufficient information to consider outcomes related to alcohol consumption and diet.

## **INTRODUCTION**

Cardiovascular disease (CVD) is a significant cause of mortality and morbidity worldwide,[1] and results in substantial global healthcare expenditure.[2] In 2009, the National Health Service (NHS) in England began a Health Check (HC) programme with the intention of identifying and managing individuals at higher risk of CVD or related conditions, such as diabetes mellitus and kidney disease, and preventing such conditions. This is similar to national programmes in other countries including in Canada[3] and the United States.[4] Modelling by the UK Department of Health suggested that the NHS HC programme could prevent 1,600 strokes and heart attacks each year.[5] More recent estimation of the health benefits from microsimulation modelling using existing programme data suggest that the NHS HC programme results in approximately 300 fewer deaths and 1,000 people living free from disease (ischaemic heart disease, stroke, dementia and lung cancer) each year in England.[6]

Patients that are eligible to participate in the NHS HC programme are invited for HCs every five years. Patients are eligible if they are aged 40-74 and have no known CVD, diabetes, kidney disease or previous treatment with statins. The HC itself is performed in primary care, largely in general practice, and comprises an assessment of smoking status, diet, exercise, family history and more recently alcohol intake. Measurements are taken of body mass index (BMI), waist circumference, blood pressure (BP) and cholesterol, and a 10 and 20 year CVD risk score is calculated. Patients with systolic BP (SBP) or diastolic BP (DBP)  $\geq 140$  mmHg or 90 mmHg, respectively, have additional blood tests to measure kidney function. If impaired kidney function is detected, that is an estimated glomerular filtration rate (eGFR)  $< 60$  ml / min / 1.73 m<sup>2</sup>, the blood test is repeated within two weeks to confirm a diagnosis of CKD.[7] Any HC attendee with BMI  $\geq 30$  kg / m<sup>2</sup> ( $\geq 25$  kg / m<sup>2</sup> in non-white ethnic groups) or SBP or DBP above  $\geq 140$  mmHg or 90 mmHg, respectively, are also screened for type 2 diabetes mellitus (T2DM) by measuring HbA1c or fasting glucose. If CVD risk factors are newly identified or conditions newly diagnosed during the HC, patients are offered appropriate management, including lifestyle advice, treatments and referrals to local services.

The HC programme has been contentious from its inception. There have been concerns of a lack of proven effectiveness to justify the yearly expenditure,[8] which is thought to be around £450 million.[9] A systematic review of randomised controlled trials found that general health checks provide no overall reduction in CVD or cancer mortality, only an increase in risk factor recording and diagnoses.[10] The

1  
2  
3 initial implementation of the NHS HC programme suffered early problems, such as low uptake,[11]  
4 variable implementation,[12] and poor understanding of the aims and purpose of the HC among some  
5 invitees.[13] In addition, there were concerns about inequitable distribution of the HC and a resultant  
6 widening of health inequalities.[9] Proponents of the NHS HC programme argue that existing  
7 randomised trials, the most recent of which started in 1999, are not representative of more effective  
8 modern HCs and intervention strategies.[14] In addition, since the early years, participation has  
9 increased, with a 2018 study reporting that 48.2% of those invited for a HC have now attended.[15]  
10 Strategies have also increased uptake among some deprived and ethnic minority populations to or  
11 above the average.[16]

12  
13 A number of studies have evaluated the effectiveness of the NHS HC programme.[16,17] HC  
14 attendance has been associated with increased CVD risk factor recording, detection of  
15 hypercholesterolaemia and hypertension, and increased prescribing of statins comparing attenders and  
16 matched non-attenders (HR 1.58, 95% 1.53–1.63) and antihypertensives (HR 1.06, 95% 1.03–1.10).[17]  
17 HC attendees have also been shown to have reduced CVD risk scores, blood pressures and serum  
18 lipids a year afterwards.[18] However, a significant limitation of existing studies is that they have used  
19 observational data comparing HC attenders and non-attenders. Only a proportion of those invited for a  
20 HC actually attend, and those attending are not representative of the eligible population.[16,17] In this  
21 study, these limitations are addressed by comparing outcomes in eligible populations invited (i.e. not  
22 just those who attend) and not invited for an NHS HC.

## 23 **METHODS**

### 24 **Study population and data source**

25 This study took place in Hampshire, a region in the south of England comprising over 1.5 million  
26 residents in a mixture of urban, suburban and rural settings. In Hampshire, the HC is commissioned by  
27 three Local Authorities: Southampton City Council, Portsmouth City Council and Hampshire County  
28 Council. The two largest urban areas in Hampshire are the cities of Southampton and Portsmouth, each  
29 with a population of around 200,000-250,000. There were 151 General Practices that contributed data  
30 to this study. The organisation of the HC programme in Hampshire involved assigning eligible patients  
31 into five separate cohorts. Cohorts assignment was based on date of birth (DOB), although the cohorts  
32 had comparable means and distributions of ages. Specifically, patients with years of birth ending in "0"

1  
2  
3 or “5” were assigned to one cohort, “1” or “6” to another cohort, “2” or “7” to another and so forth,  
4  
5 mirroring the quinquennial invitation system used for NHS breast cancer screening. The first cohort  
6  
7 (cohort 1) was invited for a HC in the year 1<sup>st</sup> April 2011 to 31<sup>st</sup> March 2012, while the subsequent  
8  
9 cohorts (cohorts 2-5) were invited in the years beginning 1<sup>st</sup> April 2012-15. The study period was from  
10  
11 1<sup>st</sup> April 2011 to 31<sup>st</sup> March 2015. During this time, cohorts 1-4 were invited for HCs. Cohort 5 was not  
12  
13 invited and was our control group. We compared outcomes in each of the invited cohorts 1-4 separately  
14  
15 against those in cohort 5. The exact follow-up periods depended on the cohorts being compared and  
16  
17 are described below.

18  
19 The population for this study were eligible for a HC on 1<sup>st</sup> April 2011. This required a DOB between 1<sup>st</sup>  
20  
21 April 1940 - 31<sup>st</sup> March 1976 and (as of 1<sup>st</sup> April 2011) (i) no history of vascular disease (e.g. coronary  
22  
23 artery disease, cerebrovascular disease, atherosclerosis, peripheral vascular disease (PVD) or  
24  
25 circulatory system disease); (ii) no previous diagnosis of hypertension, diabetes, chronic kidney disease  
26  
27 (CKD), atrial fibrillation (AF), heart failure (HF), stroke or TIA; and (iii) no pre-existing records of  
28  
29 receiving statins prescription, palliative care, a health check, or CVD risk assessment. These medical  
30  
31 eligibility criteria matched the criteria used locally by GPs to identify and invite participants to participate  
32  
33 in the HC programme. Using the participants DOBs, we assigned them into cohorts 1-5 to identify the  
34  
35 years they were invited for a HC between 1<sup>st</sup> April 2011 and 31<sup>st</sup> March 2015 (or not invited in the case  
36  
37 of cohort 5). As is explained below, for some analyses, we reapplied the eligibility criteria to identify  
38  
39 participants still eligible for a HC at the start of each invitation year.

40  
41 As there was a temporary pause in sending out HC invitations during the first half of the year beginning  
42  
43 1<sup>st</sup> April 2012 in the Hampshire County Council Local Authority, we excluded patients belonging to  
44  
45 cohort 2 living in that area. We excluded patients with incomplete medical records (i.e. no GP  
46  
47 attendance record before 1<sup>st</sup> April 2011) as we assumed that those patients had moved into the area  
48  
49 after the start of the follow-up. We excluded patients with medical records not formatted according to  
50  
51 READ Codes Version 2 (around 15% of the population).

52  
53 We acquired data for this study from the Hampshire Health Record Analytical database (HHRA). At the  
54  
55 time of the study, the HHRA linked anonymised clinical records from 151 primary care practices,  
56  
57 secondary care (e.g. inpatient, outpatient, and A&E) from 3 acute (hospital) NHS trusts, and laboratory  
58  
59 and pathology tests. The HHRA also contains deprivation indices for the populations served by the  
60  
included GP practices. The HHRA covers a registered population of around 1.5 million patients.



1  
2  
3 Unfortunately, the organisation or the HHRA is such that some patients who die are removed from the  
4 database. As such, we did not use mortality or CVD events, which frequently result in death, as  
5 outcomes.  
6  
7

### 8 9 **Information extracted and outcome measures**

10  
11 For each participant, we extracted from HHRA data concerning HC attendance, age, gender and  
12 individual level deprivation (IMD) at baseline. Ethnicity was poorly recorded (50% missing) and, thus,  
13 not extracted. We extracted data for the following outcomes: (i) recording of blood pressure (BP), total  
14 serum cholesterol (TC), smoking status (i.e., “current smoker”, “ex-smoker”, and “never smoker”), BMI,  
15 and 10-year CVD risk score (e.g. Framingham and QRISK); (ii) detection of CVD risk score >10%, CVD  
16 risk score >20%, current smoker, TC >5.5 mmol/L, TC >7.5 mmol/L, and BMI >30 kg/m<sup>2</sup>; (iii) new  
17 diagnoses of hypertension, AF, diabetes and CKD (stage 3 and below); and (iv) new interventions with  
18 statins, antihypertensives, antiglycaemic medication, nicotine replacement, anti-obesity medication,  
19 stop-smoking advice/referral and weight management advice/referral. We identified outcomes only  
20 where corresponding Read codes had been recorded (e.g. we did not assume that BMI had been  
21 measured just because a weight management referral had been made). Data were extracted from the  
22 HHRA in January 2017.  
23  
24  
25  
26  
27  
28  
29  
30  
31  
32  
33

### 34 35 **Follow-up periods and statistical analysis**

36  
37 For each cohort overall and for HC attendees / non-attendees within each cohort separately, we  
38 calculated baseline means and standard derivations of age, gender and deprivation index. We  
39 calculated proportions (%) with outcomes occurring between 1<sup>st</sup> April 2011 and 31<sup>st</sup> March 2015. We  
40 calculated absolute differences in these proportions for each of cohorts 1-4 vs. 5 (i.e. invited vs non-  
41 invited) as well as the range (i.e. of absolute differences for cohorts 1-4 vs. 5). We also compared  
42 proportions with outcomes among attendees and non-attendees. Given the large sample sizes, p-  
43 values for differences in proportions were generally highly significant and, thus, not reported.  
44  
45  
46  
47  
48  
49

50  
51 In the second stage of our analysis, we calculated ORs for each outcome. We employed multivariable  
52 logistic regression models adjusted for age and gender. We calculated ORs for each invited cohort (i.e.  
53 cohorts 1-4) separately, with the reference being uninvited cohort 5. All analyses were by intention to  
54 treat. We did sensitivity analysis by excluding those who attended opportunistically. In these analyses,  
55 follow-up was from the start of the invitation year of the invited cohort until 31<sup>st</sup> March 2015. For cohorts  
56  
57  
58  
59  
60

1  
2  
3 1-4 vs. 5, follow-up periods were from 1<sup>st</sup> April 2011, 1<sup>st</sup> April 2012, 1<sup>st</sup> April 2013, 1<sup>st</sup> April 2014,  
4 respectively, until 31<sup>st</sup> March 2015. We included only participants still eligible at the start of the invitation  
5 year. As invitations were sent out throughout each year rather than all at the start, participants were  
6 invited on average six months from the start of their invitation years. This corresponds to follow-up  
7 periods for comparisons of cohorts 1-4 vs. 5, respectively, of 3.5, 2.5, 1.5 and 0.5 years.  
8  
9  
10  
11  
12

13 This study received ethical approval from the Research Ethics Committee at the University of  
14 Southampton ID: 24358) and approval from the Hampshire Health Record Information Governance  
15 Group. Data extraction was implemented using SQL server 2008 R2, and statistical analyses were  
16 conducted using R.[19]  
17  
18  
19  
20

### 21 **Patient involvement**

22  
23 There were no patients directly involved in this study  
24

## 25 **RESULTS**

### 26 **Study sample and baseline characteristics**

27  
28 The derivation of the study population and five cohorts is shown in figure 1. 399,420 met our inclusion  
29 criteria and had medical records formatted as READ Codes Version 2. From those, we excluded 6,641  
30 without a recorded DOB and a further 26,774 patients without entries in their health records from before  
31 1<sup>st</sup> April 2011 who likely moved into Hampshire after the start of the follow-up period. The remaining  
32 366,005 participants formed our study population. Table 1 summarises their baseline characteristics  
33 broken down into cohorts 1-5. The cohorts had similar proportions of male gender (within 1%) and mean  
34 deprivation scores (within one centile). The cohorts differed more markedly in mean age, although the  
35 maximum difference was just 3 years between cohorts 1 and 5. The age differences reflected the HC  
36 invitation system in Hampshire which, as is described above, is based on DOB. However, figure 2  
37 comprises histograms showing broadly similar distributions of ages within each cohort.  
38  
39  
40  
41  
42  
43  
44  
45  
46  
47  
48  
49  
50  
51  
52  
53  
54  
55  
56  
57  
58  
59  
60

**Table 1.** Demographic information of the five cohorts overall and broken down into HC attendees and non-attendees within each cohort.

|                  | Cohort 1        |          |          | Cohort 2        |          |          | Cohort 3        |          |          | Cohort 4        |          |          | Cohort 5        |          |          |
|------------------|-----------------|----------|----------|-----------------|----------|----------|-----------------|----------|----------|-----------------|----------|----------|-----------------|----------|----------|
|                  | All             | Att      | DNA      |
| N                | <b>76146</b>    | 9464     | 66682    | <b>39232</b>    | 9868     | 29364    | <b>80220</b>    | 19991    | 60229    | <b>81676</b>    | 21188    | 60488    | <b>88731</b>    | 4232     | 84499    |
| % male           | <b>47.5</b>     | 45.6     | 47.8     | <b>46.5</b>     | 40.7     | 48.3     | <b>47.0</b>     | 41.0     | 49.0     | <b>47.4</b>     | 41.9     | 49.3     | <b>47.2</b>     | 48.0     | 47.1     |
| Age range        | <b>(40, 70)</b> | (40, 70) | (40, 70) | <b>(39, 69)</b> | (39, 69) | (39, 69) | <b>(38, 68)</b> | (38, 68) | (38, 68) | <b>(37, 67)</b> | (37, 67) | (37, 67) | <b>(36, 71)</b> | (36, 71) | (36, 71) |
| Mean age (SD)    | <b>51(9.0)</b>  | 54(9.9)  | 50(8.7)  | <b>50(9.1)</b>  | 53(9.5)  | 49(8.7)  | <b>49(9.0)</b>  | 52(9.6)  | 48(8.6)  | <b>48(9.9)</b>  | 51(9.4)  | 47(8.8)  | <b>48(9.5)</b>  | 59(10.4) | 48(9.5)  |
| Mean decile (SD) | <b>7.3(2.6)</b> | 7.8(2.4) | 7.3(2.6) | <b>7.3(2.6)</b> | 7.9(2.3) | 7.2(2.7) | <b>7.3(2.6)</b> | 7.7(2.4) | 7.2(2.7) | <b>7.3(2.6)</b> | 7.7(2.4) | 7.2(2.7) | <b>7.3(2.6)</b> | 7.5(2.6) | 7.3(2.6) |

Attended (Att), number (N), did not attend (DNA), standard deviation (SD)

For peer review only

1  
2  
3 HC attendees in all cohorts were more likely to be female, older and less deprived compared to those  
4 who did not attend (Table 1). Proportions within each invited cohort (i.e. cohorts 1-4) attending HCs  
5 increased year on year during the follow-up, and for cohorts 1-4 were 12%, 27%, 28% and 30%,  
6  
7 respectively. Despite not being formally invited, a number of patients in cohort 5 attended a HC during  
8  
9 the follow-up period. These patients had likely responded to local or national advertising for the HC  
10  
11 programme or had been offered HCs opportunistically by their GPs.  
12  
13

### 14 15 **Proportions of risk factor recording, detection, diagnoses and interventions**

16  
17 Table 2 summarises the proportions of patients with recording and detection of risk factors, new  
18  
19 diagnoses, and new interventions during the follow-up period, which varied by cohort. The results are  
20  
21 shown for each cohort overall and separately for attendees and non-attendees within each cohort.  
22  
23 Proportions generally increased year on year for cohorts 1-4, reflecting increasing attendance, and were  
24  
25 lowest in the uninvited cohort 5. There were increases in absolute proportions in invited cohorts 1-4  
26  
27 with recorded BP (range for cohorts 1-4 vs. 5 = 5.0%-7.9%), BMI (5.0%-13.4%), TC (8.4%-17.5%), CVD  
28  
29 risk (7.3%-19.6%) and smoking status (2.8%-7.0%). In addition, there was increased detection of CVD  
30  
31 risk >10% (2.0%-3.6%), SBP >140 / DBP >90 (0.9%-2.1%), BMI >30 kg/m<sup>2</sup> (0.8%-2.5%), TC >5.5  
32  
33 mmol/L (4.1%-7.0%) and TC >7.5 mmol/L (0.3%-0.4%). There were modest or no consistent differences  
34  
35 in proportions with detected CVD risk >20% (0.0%-0.6%) and current smoking (-0.2%-0.5%).  
36

37  
38 The proportions with detection of risk factors among those with recordings were lower in the invited  
39  
40 cohorts (i.e. 1-4) compared to uninvited cohort 5, particularly for CVD risk >10% (-11.5% - -2.8%), >20%  
41  
42 (-6.1% - -1.8%) and BMI >30 kg/m<sup>2</sup> (-2.8% - -1.1%). Even though smaller absolute numbers of high  
43  
44 risk patients were identified by opportunistic testing, these data suggest a higher positive predictive  
45  
46 value of opportunistic testing compared to the HC, which may reflect different risk profiles of patients.  
47

48  
49 HC resulted in minor or no increases in proportions with new diagnoses of hypertension (0.3%-0.6%),  
50  
51 AF (0.0%-0.1%), CKD (0.1%) or diabetes (0.0%-0.1%). There were minor increases in proportions  
52  
53 receiving statins (0.3%-1.0%), antihypertensives (0.1%-0.6%) and stop smoking advice (0.4%-0.9%),  
54  
55 but no consistent difference in antiglycaemics (-0.1%-0.1%), NRT (0.0%) or anti-obesity medications  
56  
57 (0.0%). There was an increase in weight advice / referrals (4.6%-10.5%).  
58  
59  
60

**Table 2.** Proportions of participants with risk factor recording / detection, new diagnoses and new interventions in each of the five cohorts overall and for HC attendees and non-attendees within each cohort separately.

|                                                       | C1   |      |      | C2   |      |      | C3   |      |      | C4   |      |      | C5   |      |      |
|-------------------------------------------------------|------|------|------|------|------|------|------|------|------|------|------|------|------|------|------|
|                                                       | All  | Att  | DNA  |
| <b>RECORDING %</b>                                    |      |      |      |      |      |      |      |      |      |      |      |      |      |      |      |
| BP                                                    | 72.3 | 98.6 | 68.5 | 75.2 | 98.6 | 67.3 | 74.3 | 98.7 | 66.3 | 73.3 | 98.6 | 64.4 | 67.3 | 99.1 | 65.7 |
| BMI                                                   | 48.4 | 97.7 | 41.4 | 56.5 | 98.5 | 42.3 | 56.5 | 98.5 | 42.5 | 56.8 | 98.6 | 42.2 | 43.4 | 98.0 | 40.6 |
| TC                                                    | 41.5 | 97.6 | 33.6 | 49.5 | 97.1 | 33.6 | 49.4 | 97.0 | 33.6 | 50.6 | 97.2 | 34.2 | 33.1 | 96.1 | 30.0 |
| CVD risk                                              | 23.0 | 89.0 | 13.7 | 32.8 | 89.4 | 13.8 | 33.2 | 89.1 | 14.7 | 35.3 | 92.3 | 15.3 | 15.7 | 90.2 | 11.9 |
| Smoking status                                        | 71.8 | 98.5 | 68.1 | 75.8 | 98.9 | 68.0 | 75.7 | 98.7 | 68.1 | 76.0 | 98.4 | 68.2 | 69.0 | 98.7 | 67.6 |
| <b>DETECTION %</b>                                    |      |      |      |      |      |      |      |      |      |      |      |      |      |      |      |
| CVD risk >10%                                         | 7.7  | 29.0 | 4.7  | 9.3  | 23.0 | 4.7  | 9.0  | 22.2 | 4.6  | 8.8  | 20.7 | 4.6  | 5.7  | 44.5 | 3.8  |
| % of CVD risk recorded with >10%                      | 33.6 | 32.6 | 34.5 | 28.4 | 25.7 | 34.3 | 27.0 | 24.9 | 31.1 | 24.9 | 22.5 | 30.1 | 36.4 | 49.3 | 31.5 |
| CVD risk >20%                                         | 2.2  | 8.1  | 1.3  | 2.4  | 5.2  | 1.4  | 2.1  | 4.4  | 1.3  | 1.8  | 3.6  | 1.2  | 1.8  | 15.0 | 1.1  |
| % of CVD risk recorded with >20%                      | 9.4  | 9.1  | 9.6  | 7.2  | 5.8  | 10.1 | 6.3  | 5.0  | 9.1  | 5.1  | 3.9  | 7.8  | 11.2 | 16.6 | 9.1  |
| SBP >140 or DBP > 90                                  | 17.8 | 24.6 | 16.8 | 17.5 | 20.1 | 16.6 | 17.3 | 20.6 | 16.3 | 16.6 | 19.7 | 15.6 | 15.7 | 29.9 | 14.9 |
| % of BP recorded with >140 or >90                     | 24.6 | 25.0 | 24.5 | 23.3 | 20.4 | 24.7 | 23.3 | 20.8 | 24.5 | 22.7 | 20.0 | 24.2 | 23.3 | 30.2 | 22.7 |
| Current smoker                                        | 20.7 | 17.0 | 21.2 | 20.8 | 14.6 | 22.8 | 20.9 | 14.4 | 23.1 | 21.4 | 16.3 | 23.2 | 20.9 | 18.4 | 21.1 |
| % of smoking status recorded who currently smoke      | 28.8 | 17.3 | 31.1 | 27.4 | 14.8 | 33.6 | 27.6 | 14.6 | 33.9 | 28.2 | 16.6 | 34.1 | 30.3 | 18.6 | 31.2 |
| BMI >30                                               | 12.6 | 18.0 | 11.9 | 13.9 | 17.6 | 12.7 | 13.8 | 17.9 | 12.4 | 14.3 | 19.7 | 12.3 | 11.8 | 20.1 | 11.4 |
| % BMI recoded with >30                                | 26.1 | 18.5 | 28.7 | 24.7 | 17.9 | 30.0 | 24.4 | 18.2 | 29.1 | 25.1 | 20.0 | 29.2 | 27.2 | 20.5 | 28.0 |
| TC > 5.5                                              | 19.1 | 44.1 | 15.5 | 22.0 | 43.1 | 14.9 | 21.4 | 41.4 | 14.8 | 21.6 | 39.8 | 15.2 | 15.0 | 48.8 | 13.3 |
| % of TC recorded with >5.5                            | 46.0 | 45.2 | 46.2 | 44.3 | 44.4 | 44.3 | 43.3 | 42.7 | 43.9 | 42.7 | 40.9 | 44.4 | 45.3 | 50.8 | 44.4 |
| TC > 7.5                                              | 1.4  | 2.7  | 1.2  | 1.5  | 2.4  | 1.2  | 1.5  | 2.5  | 1.1  | 1.5  | 2.3  | 1.3  | 1.1  | 3.3  | 1.0  |
| % of TC recorded with >7.5                            | 3.3  | 2.8  | 3.6  | 3.1  | 2.5  | 3.6  | 3.0  | 2.6  | 3.3  | 3.1  | 2.4  | 3.8  | 3.4  | 3.4  | 3.4  |
| <b>DIAGNOSES %</b>                                    |      |      |      |      |      |      |      |      |      |      |      |      |      |      |      |
| Hypertension                                          | 4.2  | 4.7  | 4.1  | 4.1  | 3.7  | 4.3  | 3.9  | 3.0  | 4.2  | 4.0  | 2.5  | 4.5  | 3.6  | 6.5  | 3.5  |
| % of SBP >140 or DBP > 90 with hypertension diagnosis | 18.0 | 15.1 | 18.7 | 17.7 | 13.6 | 19.3 | 17.5 | 11.5 | 20.1 | 17.8 | 9.3  | 21.6 | 17.3 | 16.4 | 17.4 |
| AF                                                    | 0.5  | 0.5  | 0.5  | 0.4  | 0.4  | 0.4  | 0.4  | 0.4  | 0.5  | 0.4  | 0.2  | 0.4  | 0.4  | 0.9  | 0.3  |
| CKD                                                   | 0.3  | 0.3  | 0.3  | 0.3  | 0.4  | 0.3  | 0.3  | 0.2  | 0.3  | 0.3  | 0.1  | 0.3  | 0.2  | 0.6  | 0.2  |
| Diabetes                                              | 1.3  | 0.9  | 1.3  | 1.2  | 0.7  | 1.4  | 1.3  | 0.6  | 1.5  | 1.3  | 0.6  | 1.6  | 1.2  | 1.2  | 1.2  |
| <b>INTERVENTIONS %</b>                                |      |      |      |      |      |      |      |      |      |      |      |      |      |      |      |
| Statin                                                | 4.9  | 7.7  | 4.5  | 5.0  | 5.6  | 4.8  | 4.4  | 4.5  | 4.4  | 4.3  | 3.3  | 4.6  | 4.0  | 13.0 | 3.6  |
| % of CVD>10% prescribed statins                       | 22.5 | 16.5 | 27.8 | 18.8 | 12.7 | 28.8 | 17.6 | 11.4 | 27.5 | 16.2 | 9.3  | 27.0 | 23.6 | 19.0 | 26.2 |
| % of CVD>20% prescribed statins                       | 40.7 | 31.5 | 48.8 | 37.9 | 28.7 | 49.4 | 38.2 | 27.4 | 50.2 | 36.5 | 23.0 | 50.8 | 41.9 | 33.9 | 47.5 |
| Antihypertensive                                      | 7.6  | 8.0  | 7.5  | 7.7  | 6.9  | 7.9  | 7.3  | 6.1  | 7.7  | 7.2  | 5.8  | 7.7  | 7.1  | 10.6 | 6.9  |
| % of hypertensives prescribed antihypertensive        | 78.5 | 79.6 | 78.3 | 78.5 | 77.7 | 78.7 | 78.4 | 79.3 | 78.2 | 77.7 | 77.3 | 77.8 | 78.3 | 85.0 | 77.7 |
| Antiglycaemics                                        | 1.1  | 0.7  | 1.2  | 1.0  | 0.6  | 1.2  | 1.1  | 0.5  | 1.3  | 1.2  | 0.5  | 1.4  | 1.1  | 1.1  | 1.1  |
| % of diabetics prescribed antiglycaemics              | 74.2 | 66.7 | 74.9 | 74.4 | 66.7 | 75.7 | 74.9 | 60.5 | 76.9 | 73.2 | 59.2 | 75.1 | 76.7 | 73.1 | 76.9 |
| Nicotine replacement                                  | 1.1  | 0.9  | 1.1  | 1.1  | 0.9  | 1.2  | 1.1  | 0.8  | 1.2  | 1.1  | 0.8  | 1.2  | 1.1  | 1.2  | 1.1  |
| % of current smokers prescribed nicotine replace      | 4.6  | 4.7  | 4.5  | 4.7  | 5.2  | 4.6  | 4.7  | 5.1  | 4.7  | 4.6  | 4.4  | 4.6  | 4.6  | 6.2  | 4.6  |
| Stop smoking advice                                   | 7.4  | 9.9  | 7.1  | 7.9  | 8.5  | 7.8  | 7.6  | 7.7  | 7.5  | 7.7  | 8.4  | 7.5  | 7.0  | 10.3 | 6.9  |

|                                     |             |      |      |             |      |      |             |      |      |             |      |      |             |      |      |
|-------------------------------------|-------------|------|------|-------------|------|------|-------------|------|------|-------------|------|------|-------------|------|------|
| % of current smokers given advice   | <b>22.8</b> | 26.8 | 22.4 | <b>23.7</b> | 24.5 | 23.5 | <b>22.7</b> | 23.5 | 22.6 | <b>22.7</b> | 23.8 | 22.5 | <b>22.3</b> | 25.3 | 22.1 |
| Weight advice/referral              | <b>12.9</b> | 55.5 | 6.8  | <b>18.3</b> | 52.3 | 6.8  | <b>18.4</b> | 51.7 | 7.4  | <b>18.8</b> | 49.6 | 8.0  | <b>8.3</b>  | 55.7 | 5.9  |
| % of BMI>30 given advice/referral   | <b>26.8</b> | 63.2 | 19.0 | <b>31.5</b> | 60.1 | 18.2 | <b>33.3</b> | 60.0 | 20.6 | <b>34.4</b> | 57.7 | 21.3 | <b>20.8</b> | 60.8 | 17.2 |
| Anti-obesity                        | <b>0.3</b>  | 0.2  | 0.3  | <b>0.3</b>  | 0.2  | 0.4  | <b>0.3</b>  | 0.3  | 0.3  | <b>0.3</b>  | 0.3  | 0.3  | <b>0.3</b>  | 0.2  | 0.3  |
| % of BMI>30 prescribed anti-obesity | <b>1.8</b>  | 1.0  | 2.0  | <b>2.0</b>  | 0.9  | 2.5  | <b>1.8</b>  | 1.2  | 2.1  | <b>1.8</b>  | 1.0  | 2.2  | <b>2.1</b>  | 0.7  | 2.2  |

Attended (Att), Blood pressure (BP), body mass index (BMI), total cholesterol (TC), cardiovascular disease (CVD), systolic blood pressure (SBP), diastolic blood pressure (DBP), atrial fibrillation (AF), chronic kidney disease (CKD)

For peer review only

1  
2  
3 Proportions receiving statins were lower among HC invited cohorts compared to non-invited following  
4 detection of CVD risk >10% (-7.4% - -1.1%) and >20% (-5.4% - -1.2%). Similarly, antiglycaemic  
5 interventions among new cases of diabetes were lower (-3.5% - -1.8%), as were new anti-obesity  
6 prescriptions following detection of BMI >30 kg/m<sup>2</sup> (-0.3% - -0.1%). Differences in proportions receiving  
7 antihypertensives following new hypertension diagnoses were inconsistent (-0.6% - 0.2%), but there  
8 was an increase in proportions among HC invitees receiving weight advice / referral following detection  
9 of BMI >30 kg/m<sup>2</sup> (6.0%-13.6%).  
10  
11

### 12 **Odds ratios of risk factor detection, diagnoses and interventions**

13  
14 Table 3 summarises the ORs and 95% confidence intervals from the regression analyses. Compared  
15 to uninvited cohort 5 (including and excluding those who attended opportunistically), the odds of  
16 detection of risk factors, new diagnoses and interventions were generally higher in invited cohorts 1-4,  
17 and they increased year on year throughout the study period. For cohort 4 vs. 5, there were large and  
18 significant increases in the odds of detecting CVD risk >10% (OR 8.01, 7.34-8.73), CVD risk >20% (OR  
19 5.86, 4.83-7.10) TC> 5.5 mmol/L (OR 3.72, 3.57-3.89), TC >7.5 mmol/L (OR 2.89, 2.46-3.38) and BMI >  
20 30 kg/m<sup>2</sup> (OR 2.05, 1.96-2.14). These may be conservative given that the average follow-up was just 6  
21 months, and for some participants almost none, while many outcomes from the HC would likely take  
22 longer to occur. There were significant increases in detection of current smokers (OR 1.22, 1.18-1.26)  
23 and elevated BP (OR 1.64, 1.57-1.70). There were modest increases in new diagnoses of hypertension  
24 (OR 1.33, 1.20-1.47) and diabetes (OR 1.34, 1.12-1.61), but not AF (OR 1.00, 0.72-1.39) or CKD (OR  
25 0.69, 0.36-1.32). In terms of new interventions, there were increases in weight advice / referrals (OR  
26 8.36, 7.89-8.86), stop smoking advice (OR 1.65, 1.51-1.79), statins (OR 1.54, 1.39-1.71) and  
27 antihypertensives (OR 1.15, 1.06-1.24). The ORs of CVD risk >10% plus statin or >20% plus statin,  
28 respectively, were 2.90 (2.36-3.57) and 2.60 (1.92-3.52). The OR of hypertension diagnosis plus  
29 antihypertensive treatment was 1.33 (1.18-1.50). There were no significant differences in prescriptions  
30 of NRT (OR 0.92, 0.71-1.20), antiglycaemics (OR 1.18, 0.97-1.44) or anti-obesity medications (OR 1.00,  
31 0.68-1.48).  
32  
33  
34  
35  
36  
37  
38  
39  
40  
41  
42  
43  
44  
45  
46  
47  
48  
49  
50  
51  
52  
53  
54  
55  
56  
57  
58  
59  
60



**Table 3.** Age and gender adjusted odds ratios with 95% confidence intervals for associations between invitation for an NHS health check and the detection of CVD risk factors, new diagnoses and interventions. Results are shown for the comparisons of cohorts 1-4 against all of cohort 5 and against patients in cohort 5 who we confirmed did not attend (DNA) a HC incidentally.

|                        | Cohort1 vs       |                  | Cohort2 vs       |                  | Cohort3 vs       |                  | Cohort4 vs       |                     |
|------------------------|------------------|------------------|------------------|------------------|------------------|------------------|------------------|---------------------|
|                        | Cohort5 All      | Cohort5 DNA         |
| <b>DETECTION %</b>     |                  |                  |                  |                  |                  |                  |                  |                     |
| CVD risk >10%          | 1.20 (1.15-1.25) | 1.71 (1.64-1.80) | 1.93 (1.82-2.04) | 2.66 (2.50-2.83) | 3.28 (3.08-3.50) | 3.98 (3.71-4.27) | 8.01 (7.34-8.73) | 11.17 (10.13-12.33) |
| CVD risk >20%          | 1.07 (0.99-1.15) | 1.49 (1.37-1.63) | 1.44 (1.29-1.61) | 1.90 (1.69-2.15) | 2.83 (2.48-3.23) | 3.12 (2.72-3.58) | 5.86 (4.83-7.10) | 7.18 (5.82-8.85)    |
| SBP >140 or DBP > 90   | 1.04 (1.01-1.07) | 1.06 (1.03-1.09) | 1.08 (1.05-1.12) | 1.10 (1.06-1.14) | 1.23 (1.19-1.27) | 1.26 (1.21-1.30) | 1.64 (1.57-1.70) | 1.69 (1.62-1.76)    |
| Current smoker         | 1.03 (1.01-1.06) | 1.03 (1.01-1.06) | 1.05 (1.02-1.09) | 1.05 (1.02-1.09) | 1.05 (1.02-1.08) | 1.05 (1.03-1.08) | 1.22 (1.18-1.26) | 1.23 (1.19-1.27)    |
| BMI >30                | 1.09 (1.06-1.12) | 1.14 (1.11-1.18) | 1.26 (1.21-1.31) | 1.31 (1.26-1.36) | 1.46 (1.41-1.51) | 1.52 (1.47-1.58) | 2.05 (1.96-2.14) | 2.18 (2.09-2.28)    |
| TC > 5.5               | 1.19 (1.16-1.23) | 1.33 (1.29-1.37) | 1.67 (1.61-1.72) | 1.83 (1.77-1.90) | 2.10 (2.03-2.17) | 2.27 (2.19-2.34) | 3.72 (3.57-3.89) | 4.20 (4.02-4.39)    |
| TC > 7.5               | 1.12 (1.02-1.22) | 1.19 (1.08-1.30) | 1.42 (1.26-1.59) | 1.52 (1.35-1.71) | 1.66 (1.47-1.87) | 1.76 (1.56-1.99) | 2.89 (2.46-3.38) | 3.15 (2.67-3.72)    |
| <b>DIAGNOSES %</b>     |                  |                  |                  |                  |                  |                  |                  |                     |
| Hypertension           | 1.04 (0.99-1.09) | 1.03 (0.98-1.09) | 1.06 (0.98-1.14) | 1.04 (0.97-1.12) | 1.10 (1.02-1.19) | 1.10 (1.02-1.19) | 1.33 (1.20-1.47) | 1.34 (1.20-1.48)    |
| AF                     | 1.14 (0.98-1.32) | 1.11 (0.95-1.30) | 0.91 (0.72-1.14) | 0.89 (0.71-1.13) | 1.33 (1.06-1.67) | 1.31 (1.05-1.65) | 1.00 (0.72-1.39) | 1.01 (0.72-1.40)    |
| CKD                    | 1.01 (0.84-1.22) | 0.98 (0.81-1.19) | 1.22 (0.93-1.61) | 1.18 (0.90-1.57) | 1.08 (0.77-1.51) | 1.06 (0.76-1.49) | 0.69 (0.36-1.32) | 0.68 (0.36-1.30)    |
| Diabetes               | 0.99 (0.91-1.08) | 0.97 (0.88-1.06) | 0.95 (0.84-1.09) | 0.94 (0.82-1.07) | 1.12 (0.99-1.28) | 1.12 (0.98-1.27) | 1.34 (1.12-1.61) | 1.36 (1.13-1.64)    |
| <b>INTERVENTIONS %</b> |                  |                  |                  |                  |                  |                  |                  |                     |
| Statin                 | 1.06 (1.01-1.11) | 1.12 (1.06-1.18) | 1.17 (1.09-1.25) | 1.21 (1.13-1.30) | 1.26 (1.16-1.35) | 1.27 (1.18-1.37) | 1.54 (1.39-1.71) | 1.58 (1.42-1.76)    |
| Antihypertensive       | 0.99 (0.95-1.03) | 0.99 (0.95-1.03) | 1.04 (0.99-1.10) | 1.04 (0.98-1.09) | 1.04 (0.98-1.10) | 1.04 (0.98-1.10) | 1.15 (1.06-1.24) | 1.15 (1.07-1.24)    |
| Antiglycaemics         | 0.93 (0.85-1.02) | 0.92 (0.83-1.01) | 0.90 (0.79-1.04) | 0.90 (0.78-1.03) | 1.04 (0.91-1.20) | 1.03 (0.90-1.19) | 1.18 (0.97-1.44) | 1.19 (0.97-1.45)    |
| Nicotine               | 1.00 (0.91-1.10) | 1.01 (0.92-1.11) | 1.05 (0.91-1.22) | 1.07 (0.92-1.24) | 1.04 (0.88-1.22) | 1.08 (0.91-1.28) | 0.92 (0.71-1.20) | 0.96 (0.73-1.25)    |
| Stop smoking advice    | 1.08 (1.04-1.12) | 1.12 (1.08-1.16) | 1.19 (1.13-1.26) | 1.23 (1.17-1.30) | 1.28 (1.20-1.35) | 1.32 (1.25-1.40) | 1.65 (1.51-1.79) | 1.74 (1.60-1.90)    |
| Weight advice/referral | 1.50 (1.45-1.55) | 2.14 (2.07-2.22) | 2.84 (2.73-2.95) | 3.98 (3.81-4.16) | 4.21 (4.04-4.40) | 5.69 (5.42-5.98) | 8.36 (7.89-8.86) | 14.33 (13.31-15.43) |



|   |                        |                         |                         |                         |                         |                         |                         |                         |                  |
|---|------------------------|-------------------------|-------------------------|-------------------------|-------------------------|-------------------------|-------------------------|-------------------------|------------------|
| 1 | Anti-obesity           | 1.06<br>(0.88-<br>1.26) | 1.06<br>(0.88-<br>1.27) | 1.11<br>(0.85-<br>1.44) | 1.11<br>(0.85-<br>1.44) | 1.09<br>(0.83-<br>1.44) | 1.08<br>(0.82-<br>1.42) | 1.00<br>(0.68-<br>1.48) | 1.00 (0.68-1.49) |
| 2 | CVD>10% & statin       | 1.12<br>(1.03-<br>1.21) | 1.35<br>(1.24-<br>1.48) | 1.27<br>(1.12-<br>1.43) | 1.49<br>(1.31-<br>1.70) | 1.78<br>(1.54-<br>2.07) | 1.90<br>(1.63-<br>2.21) | 2.90<br>(2.36-<br>3.57) | 3.27 (2.63-4.06) |
| 3 | CVD>20% & statin       | 1.03<br>(0.92-<br>1.15) | 1.25<br>(1.11-<br>1.42) | 1.07<br>(0.90-<br>1.28) | 1.28<br>(1.06-<br>1.54) | 1.58<br>(1.29-<br>1.94) | 1.67<br>(1.36-<br>2.06) | 2.60<br>(1.92-<br>3.52) | 2.95 (2.15-4.04) |
| 4 | HTN & antihypertensive | 1.04<br>(0.98-<br>1.10) | 1.04<br>(0.98-<br>1.10) | 1.06<br>(0.97-<br>1.15) | 1.05<br>(0.96-<br>1.14) | 1.11<br>(1.02-<br>1.21) | 1.11<br>(1.02-<br>1.21) | 1.33<br>(1.18-<br>1.50) | 1.33 (1.18-1.50) |

5 Body mass index (BMI), total cholesterol (TC), cardiovascular disease (CVD), systolic blood pressure (SBP), diastolic blood pressure (DBP), atrial fibrillation (AF), chronic  
6 kidney disease (CKD)

For peer review only

## **DISCUSSION**

This study evaluated the NHS HC programme in Hampshire from its implementation in April 2011 until March 2015. HC attendance following invitation increased year on year and as of 2015 was 30%. Attendees were older, from less deprived backgrounds and less likely to be male than those who were invited but chose not to attend. A significant finding was the large increase of up to 17.5% in the proportion of patients with measurements of TC among HC invited cohorts compared to non-invited. As might be expected, this led to large increases in detection of elevated TC >5.5 mmol/L and CVD risk >10%, as well as TC >7.5 mmol/L and CVD risk >20%. Notwithstanding, there were only small increases in detection plus treatment with statins. Explanations for this might include guidance during the study period recommending statins for CVD risk >20%, whereas the largest increased was in detection of CVD risk > 10%. Nonetheless, even among those with CVD risk >20% only 36.5%-40.7% (range for the invited cohorts) of participants were prescribed statins. This is substantially lower than the expected 75% prescription rate quoted in Public Health England and NHS literature.[20] In the uninvited group, rates of statin prescriptions following identification of CVD risk >20% were slightly higher (41.9%), but still lower than expected. Accordingly, there may be a more general issue relating to the step up from risk factor identification to diagnosis, and from diagnosis to treatment across general practice that would represent a missed opportunity at a population level for primary prevention of CVD. More specifically to the HC, there is a lack of a defined follow-up pathway following identification of increased 10-year CVD risk. Public Health England commissions and pays for the HC itself but follow-up is then a cost to General Practices which maybe a barrier. Statin prescription rates may have increased since the study period, as updated NICE guidance now recommends statins for CVD risk >10% and a recent large and well-publicised review reported a more favourable risk / benefit profile of statins than thought previously.[21] Statin prescription rates resulting from a HC may also be higher outside of Hampshire, as they are known to vary regionally.[22]

Other notable findings of this study included increased detection of elevated BP among HC invited cohorts, as well as modest increases in new diagnoses of hypertension and treatment. Those attending HCs were more likely to be diagnosed with diabetes, but the corresponding increase in prescriptions of antiglycaemics did not reach significance. According to HC guidance, diabetes screening is performed only in those deemed "at risk" with BMI  $\geq 30$  kg / m<sup>2</sup> ( $\geq 25$  kg / m<sup>2</sup> in non-white ethnic groups) or SBP or DBP above  $\geq 140$  mmHg or 90 mmHg. Data regarding the sensitivity of these criteria are limited, but one US study reported that a BMI cut off of  $\geq 25$  kg / m<sup>2</sup> "would miss 36% of Asian Americans with newly diagnosed type 2 diabetes",[23] so the HC may also have missed cases.

There was no significant increase in new diagnoses of CKD. This was likely because kidney function tests were performed only in HC patients with SBP or DBP  $\geq 140$  mmHg or 90 mmHg. A formal diagnoses of CKD would have

1 required a repeat blood test, something which would need to have been organised by the GP and agreed to by the  
2 patient.  
3

4 The HC did not result in any significant increase in new diagnoses of AF. NICE Hypertension clinical guideline 127  
5 states that practitioners should manually palpate the pulse before measuring blood pressure.[16] However, this may not  
6 have been performed consistently or reliably during the HC. Manual palpation is not necessary with electronic  
7 sphygmomanometers, and any patient with an irregular pulse would have further required an ECG to diagnose AF.  
8

9  
10  
11  
12 There were increases in detection of smokers and BMI >30 kg/m<sup>2</sup>, as well as corresponding increases in lifestyle advice  
13 / referrals, particularly for high BMI. However, there was no significant difference in NRT or anti-obesity medications.  
14

15  
16  
17 The HC had lower positive predictive values (or yield) for detection of risk factors than checks performed  
18 opportunistically. Most notably, lower proportions of CVD risk scores measured during the HC were >10% (-11.5% -  
19 -2.8%) and >20% (-6.1% - -1.8%). This may have been because GPs targeted opportunistic checks at those who were  
20 already symptomatic or because HC attendees were healthier with a lower prevalence of risk factors. A recent cohort  
21 study of 18 general practices in South London also found that participants taking up an opportunistic HC were at higher  
22 CVD risk (17% of invited HC and 22% of opportunistic HC with CVD risk score ≥10%), and that in younger adults in  
23 more deprived areas the opportunistic HC constituted a higher proportion of all HC performed. It was concluded that  
24 GPs were successfully targeting groups at higher risk who may otherwise face barriers to attendance at a pre-arranged  
25 HC.[24]  
26  
27  
28  
29  
30  
31  
32  
33

34  
35 Our findings build on existing studies that showed increasing rates of participation in the HC programme[17] and the  
36 fact that attendees tend to be older, female and non-smokers.[25] We also found that HC attendees were from higher  
37 socioeconomic groups compared to non-attendees. This reflects previous studies in Stoke on Trent[26] and across  
38 England.[27] However, a study in Bristol and[28] a national study[22] found similar rates across socioeconomic groups,  
39 but underrepresentation of ethnic minorities. A study in London reported that attendance of ethnic minorities can be  
40 increased by targeted campaigns and IT support for GPs.[17] There is likely substantial regional variability in the  
41 provision of such campaigns and support, which may in turn give rise to variability in the equity of HC attendance.  
42  
43  
44  
45  
46  
47  
48  
49  
50  
51  
52  
53  
54  
55  
56  
57  
58  
59  
60  
61  
62  
63  
64  
65  
66  
67  
68  
69  
70  
71  
72  
73  
74  
75  
76  
77  
78  
79  
80  
81  
82  
83  
84  
85  
86  
87  
88  
89  
90  
91  
92  
93  
94  
95  
96  
97  
98  
99  
100  
101  
102  
103  
104  
105  
106  
107  
108  
109  
110  
111  
112  
113  
114  
115  
116  
117  
118  
119  
120  
121  
122  
123  
124  
125  
126  
127  
128  
129  
130  
131  
132  
133  
134  
135  
136  
137  
138  
139  
140  
141  
142  
143  
144  
145  
146  
147  
148  
149  
150  
151  
152  
153  
154  
155  
156  
157  
158  
159  
160  
161  
162  
163  
164  
165  
166  
167  
168  
169  
170  
171  
172  
173  
174  
175  
176  
177  
178  
179  
180  
181  
182  
183  
184  
185  
186  
187  
188  
189  
190  
191  
192  
193  
194  
195  
196  
197  
198  
199  
200  
201  
202  
203  
204  
205  
206  
207  
208  
209  
210  
211  
212  
213  
214  
215  
216  
217  
218  
219  
220  
221  
222  
223  
224  
225  
226  
227  
228  
229  
230  
231  
232  
233  
234  
235  
236  
237  
238  
239  
240  
241  
242  
243  
244  
245  
246  
247  
248  
249  
250  
251  
252  
253  
254  
255  
256  
257  
258  
259  
260  
261  
262  
263  
264  
265  
266  
267  
268  
269  
270  
271  
272  
273  
274  
275  
276  
277  
278  
279  
280  
281  
282  
283  
284  
285  
286  
287  
288  
289  
290  
291  
292  
293  
294  
295  
296  
297  
298  
299  
300  
301  
302  
303  
304  
305  
306  
307  
308  
309  
310  
311  
312  
313  
314  
315  
316  
317  
318  
319  
320  
321  
322  
323  
324  
325  
326  
327  
328  
329  
330  
331  
332  
333  
334  
335  
336  
337  
338  
339  
340  
341  
342  
343  
344  
345  
346  
347  
348  
349  
350  
351  
352  
353  
354  
355  
356  
357  
358  
359  
360  
361  
362  
363  
364  
365  
366  
367  
368  
369  
370  
371  
372  
373  
374  
375  
376  
377  
378  
379  
380  
381  
382  
383  
384  
385  
386  
387  
388  
389  
390  
391  
392  
393  
394  
395  
396  
397  
398  
399  
400  
401  
402  
403  
404  
405  
406  
407  
408  
409  
410  
411  
412  
413  
414  
415  
416  
417  
418  
419  
420  
421  
422  
423  
424  
425  
426  
427  
428  
429  
430  
431  
432  
433  
434  
435  
436  
437  
438  
439  
440  
441  
442  
443  
444  
445  
446  
447  
448  
449  
450  
451  
452  
453  
454  
455  
456  
457  
458  
459  
460  
461  
462  
463  
464  
465  
466  
467  
468  
469  
470  
471  
472  
473  
474  
475  
476  
477  
478  
479  
480  
481  
482  
483  
484  
485  
486  
487  
488  
489  
490  
491  
492  
493  
494  
495  
496  
497  
498  
499  
500  
501  
502  
503  
504  
505  
506  
507  
508  
509  
510  
511  
512  
513  
514  
515  
516  
517  
518  
519  
520  
521  
522  
523  
524  
525  
526  
527  
528  
529  
530  
531  
532  
533  
534  
535  
536  
537  
538  
539  
540  
541  
542  
543  
544  
545  
546  
547  
548  
549  
550  
551  
552  
553  
554  
555  
556  
557  
558  
559  
560  
561  
562  
563  
564  
565  
566  
567  
568  
569  
570  
571  
572  
573  
574  
575  
576  
577  
578  
579  
580  
581  
582  
583  
584  
585  
586  
587  
588  
589  
590  
591  
592  
593  
594  
595  
596  
597  
598  
599  
600  
601  
602  
603  
604  
605  
606  
607  
608  
609  
610  
611  
612  
613  
614  
615  
616  
617  
618  
619  
620  
621  
622  
623  
624  
625  
626  
627  
628  
629  
630  
631  
632  
633  
634  
635  
636  
637  
638  
639  
640  
641  
642  
643  
644  
645  
646  
647  
648  
649  
650  
651  
652  
653  
654  
655  
656  
657  
658  
659  
660  
661  
662  
663  
664  
665  
666  
667  
668  
669  
670  
671  
672  
673  
674  
675  
676  
677  
678  
679  
680  
681  
682  
683  
684  
685  
686  
687  
688  
689  
690  
691  
692  
693  
694  
695  
696  
697  
698  
699  
700  
701  
702  
703  
704  
705  
706  
707  
708  
709  
710  
711  
712  
713  
714  
715  
716  
717  
718  
719  
720  
721  
722  
723  
724  
725  
726  
727  
728  
729  
730  
731  
732  
733  
734  
735  
736  
737  
738  
739  
740  
741  
742  
743  
744  
745  
746  
747  
748  
749  
750  
751  
752  
753  
754  
755  
756  
757  
758  
759  
760  
761  
762  
763  
764  
765  
766  
767  
768  
769  
770  
771  
772  
773  
774  
775  
776  
777  
778  
779  
780  
781  
782  
783  
784  
785  
786  
787  
788  
789  
790  
791  
792  
793  
794  
795  
796  
797  
798  
799  
800  
801  
802  
803  
804  
805  
806  
807  
808  
809  
810  
811  
812  
813  
814  
815  
816  
817  
818  
819  
820  
821  
822  
823  
824  
825  
826  
827  
828  
829  
830  
831  
832  
833  
834  
835  
836  
837  
838  
839  
840  
841  
842  
843  
844  
845  
846  
847  
848  
849  
850  
851  
852  
853  
854  
855  
856  
857  
858  
859  
860  
861  
862  
863  
864  
865  
866  
867  
868  
869  
870  
871  
872  
873  
874  
875  
876  
877  
878  
879  
880  
881  
882  
883  
884  
885  
886  
887  
888  
889  
890  
891  
892  
893  
894  
895  
896  
897  
898  
899  
900  
901  
902  
903  
904  
905  
906  
907  
908  
909  
910  
911  
912  
913  
914  
915  
916  
917  
918  
919  
920  
921  
922  
923  
924  
925  
926  
927  
928  
929  
930  
931  
932  
933  
934  
935  
936  
937  
938  
939  
940  
941  
942  
943  
944  
945  
946  
947  
948  
949  
950  
951  
952  
953  
954  
955  
956  
957  
958  
959  
960  
961  
962  
963  
964  
965  
966  
967  
968  
969  
970  
971  
972  
973  
974  
975  
976  
977  
978  
979  
980  
981  
982  
983  
984  
985  
986  
987  
988  
989  
990  
991  
992  
993  
994  
995  
996  
997  
998  
999  
1000

1 a limited effect of HC attendance on detection rates and treatment of diabetes which, as is explained above, is likely  
2 because measuring blood glucose or HBA1c is not a standard part of the HC.[16,27]  
3

4 The increases in proportions of new prescriptions we observed were much smaller than those found in the two large  
5 previous matched studies.[31] This is to be expected given that those studies compared attendees vs. non-attendees.  
6

7 In addition, it may reflect the fact that attendees had higher baseline risk than the matched non-attendees. This study  
8 has a significant advantage as we did not need to match and instead used a real uninvited population.  
9

10 Strengths of this study included the biggest sample size to date for a HC study comprising 277,274 patients invited for  
11 a HC and 88,731 patients who were not. It is the first HC study to employ a quasi-randomised method and an intention  
12 to treat analysis. Specifically, patients were allocated to either HC invited or non-invited groups according to their dates  
13 of birth. We were able to evaluate the HC programme at the level of invitation, which is advantageous compared to  
14 previous studies which compared attendance vs. non-attendance. There were also weaknesses in our methods. First,  
15 our follow-up periods were short, varying from an average of six months to 3.5 years. Process outcomes may have  
16 occurred after the end of follow-up, particularly in the case of new treatments that may have required further  
17 appointments and monitoring (e.g. for new prescriptions of antihypertensive). In addition, we were unable to observe  
18 clinically important outcomes, such as incident cardiovascular disease. For every 100 people invited for a HC in 2012/13,  
19 an extra one person was prescribed a statin. Based on a literature reported NNT for primary prevention of cardiovascular  
20 events,[32] one event may be prevented for every 560 people invited for a HC, but this estimation does not account for  
21 duration of treatment or adherence. Improving NNTs would require greater uptake of the HC and / or greater prescribing  
22 among those with identified CVD risk. A second limitation of our study was that we were missing all data including at  
23 baseline for an unknown number of patients who died during the follow-up, which was a consequence of how our data  
24 source, the HHRA, was organised. These deaths will selectively have reduced numbers of those at highest risk from  
25 our population. They will tend to have been in poorer and higher risk groups and, therefore, less likely to attend a HC.  
26 The numbers would have been balanced between the cohorts, so should not have affected our between-cohort  
27 comparisons. However, they might have reduced the overall risk profile, and differentially within cohorts favour  
28 attendance. A third limitation was contamination bias, as some patients in the uninvited group attended a HC.  
29 Contamination was largely inevitable given advertising and public awareness of the HC and given that all included GP  
30 practices were involved in delivering the programme. Contamination likely led to an underestimation of the effectiveness  
31 of the HC programme in our study. Fourth, we had limited details on some factors, including diet and alcohol intake, and  
32 non-medical interventions, such as lifestyle advice. Lifestyle advice may have ranged from brief general advice to  
33 individually tailored advice with subsequent follow-up. However, such variation likely had a small effect on our results  
34 given an earlier study that reported a lack of an association between the intensity of lifestyle advice as part of a HC and  
35 related CVD risk reduction.[5] Fifth, there were potential coding errors or omissions by GPs in recording attendance,  
36 measurements, diagnoses and interventions. Coding errors would have affected the intervention and non-intervention  
37  
38  
39  
40  
41  
42  
43  
44  
45  
46  
47  
48  
49  
50  
51  
52  
53  
54  
55  
56  
57  
58  
59  
60

1 groups equally. Sixth, we missed data on HC undertaken in community pharmacies and other non GP settings though  
2 this was a small minority. Our population was not necessarily representative of the UK, and we had no data on ethnicity.  
3  
4 Hampshire does comprise significant urban, suburban and rural populations, but the proportion of ethnic minorities is  
5  
6 lower than the national average and this may limit the generalisability of our results. Finally, our study period ended in  
7  
8 2015, and clinical guidance as well as engagement by GPs and patients with the HC programme may have changed  
9  
10 since then.

11  
12 In conclusion, this study evaluated the NHS HC programme and showed that participation increased year on year  
13  
14 between 2011 and 2015. The HC programme resulted in large increases in the detection of patients with CVD risk  
15  
16 factors, particularly raised cholesterol and 10-year CVD risk scores >10%. However, there was little evidence of an  
17  
18 associated increase in evidence based medical therapies, despite such therapies now being recommended in national  
19  
20 clinical guidance. Indeed, rates of uptake, diagnosis and treatment were well below those expected by Department of  
21  
22 Health.[33] Future work should focus on improving uptake, including through use of non-GP settings (e.g. pharmacy  
23  
24 etc.)[34] and by better communication of the programme[35,36] and invitation methods driven by behavioural  
25  
26 insights.[37] Further support is also required in decision making for patients and GPs following identification of new risk  
27  
28 factors as part of the NHS HC, potentially including incentivisation (e.g. payment by results). Finally, further studies are  
29  
30 needed to assess the longer-term effects of the HC on clinical outcomes.

### 31 **Acknowledgements**

32  
33 The authors thank NHS South, Central and West Commissioning Support Unit and the Care and Health Information  
34  
35 Exchange Information Governance Group for their support, and for provision of access to CHIA (formerly known as  
36  
37 HHRA) data.

### 38 **Figures**

39  
40  
41  
42 **Figure 1.** Derivation of the study population and five cohorts included in this study. Cohorts 1-4 were invited for HCs in  
43  
44 the years beginning 1<sup>st</sup> April 2011, 12, 13 and 14 respectively, while cohort 5, which was the control group, was not  
45  
46 invited.

47  
48 **Figure 2.** Histograms showing the distribution of ages within the five cohorts.

### 49 **References**

- 50  
51  
52  
53  
54  
55  
56  
57  
58  
59  
60
1. Newton JN, Briggs ADM, Murray CJL, et al. Changes in health in England, with analysis by English regions and areas of deprivation, 1990-2013: a systematic analysis for the Global Burden of Disease Study 2013. *Lancet* (London, England). 2015 Dec;386(10010):2257–74.
  2. Bhatnagar P, Wickramasinghe K, Williams J, et al. The epidemiology of cardiovascular disease in the UK 2014. *Heart*. 2015 Aug;101(15):1182–9.
  3. Smith ER. The Canadian heart health strategy and action plan. Vol. 25, *The Canadian journal of cardiology*. England; 2009. p. 451–2.
  4. Frieden TR, Berwick DM. The “Million Hearts” initiative--preventing heart attacks and strokes. *N Engl J Med*. 2011 Sep;365(13):e27.

5. Department of Health. Economic Modelling for Vascular Checks. London. Department of Health, 2008.
6. Mytton OT, Jackson C, Steinacher A, et al. The current and potential health benefits of the National Health Service Health Check cardiovascular disease prevention programme in England: A microsimulation study. *PLoS Med*. 2018 Mar;15(3):e1002517.
7. NHS Health Check Best practice guidance. Public Health England. March 2016. Available from: <http://www.healthcheck.nhs.uk/> (accessed 2/12/17).
8. Krogsboll LT, Jorgensen KJ, Gotzsche PC. Universal health checks should be abandoned. Vol. 347, *BMJ* (Clinical research ed.). England; 2013. p. f5227.
9. Capewell S, McCartney M, Holland W. NHS Health Checks—a naked emperor? *J Public Health (Oxf)*. 2015 Jun;37(2):187–92.
10. Krogsboll LT, Jorgensen KJ, Gronhoj Larsen C, et al. General health checks in adults for reducing morbidity and mortality from disease. *Cochrane database Syst Rev*. 2012 Oct;10:CD009009.
11. Dalton ARH, Bottle A, Okoro C, et al. Uptake of the NHS Health Checks programme in a deprived, culturally diverse setting: cross-sectional study. *J Public Health (Oxf)*. 2011 Sep;33(3):422–9.
12. Nicholas JM, Burgess C, Dodhia H, et al. Variations in the organization and delivery of the “NHS health check” in primary care. *J Public Health (Oxf)*. 2013 Mar;35(1):85–91.
13. Jenkinson CE, Asprey A, Clark CE, et al. Patients’ willingness to attend the NHS cardiovascular health checks in primary care: a qualitative interview study. *BMC Fam Pract*. 2015 Mar;16:33.
14. Waterall J, Greaves F, Gresser C, et al. Response to Capewell et al. *J Public Health (Oxf)*. 2015 Jun;37(2):193–4.
15. Martin A, Saunders CL, Harte E, et al. Delivery and impact of the NHS Health Check in the first 8 years: a systematic review. *Br J Gen Pract*. 2018 Jul;68(672):e449–59.
16. Robson J, Dostal I, Sheikh A, et al. The NHS Health Check in England: an evaluation of the first 4 years. *BMJ Open*. 2016 Jan;6(1):e008840.
17. Forster AS, Burgess C, Dodhia H, et al. Do health checks improve risk factor detection in primary care? Matched cohort study using electronic health records. *J Public Health (Oxf)*. 2016 Sep;38(3):552–9.
18. Artac M, Dalton ARH, Majeed A, et al. Effectiveness of a national cardiovascular disease risk assessment program (NHS Health Check): results after one year. *Prev Med (Baltim)*. 2013 Aug;57(2):129–34.
19. R Development Core Team (2008). R: A language and environment for statistical computing. R Foundation for Statistical Computing, Vienna, Austria. ISBN 3-900051-07-0, URL <http://www.R-project.org>.
20. Combating CVD through the NHS Health Check programme. Public Health England. [http://www.healthcheck.nhs.uk/commissioners\\_and\\_providers/data/size\\_of\\_the\\_prize\\_reducing\\_heart\\_attacks\\_and\\_strokes/](http://www.healthcheck.nhs.uk/commissioners_and_providers/data/size_of_the_prize_reducing_heart_attacks_and_strokes/) (accessed 3/12/17).
21. Collins R, Reith C, Emberson J, et al. Interpretation of the evidence for the efficacy and safety of statin therapy. *Lancet* (London, England). 2016 Nov;388(10059):2532–61.
22. Robson J, Dostal I, Madurasinghe V, et al. The NHS Health Check programme: implementation in east London 2009-2011. *BMJ Open*. 2015 Apr;5(4):e007578.
23. Araneta MR, Kanaya A, Fujimoto W, et al. Optimum BMI cut-points to screen Asian Americans for type 2 diabetes. Poster presentation at American Diabetes Association 74th Scientific Sessions, 13–17 June 2014, San Francisco, CA.
24. Gulliford MC, Khoshaba B, McDermott L, et al. Cardiovascular risk at health checks performed opportunistically or following an invitation letter. Cohort study. *J Public Health (Oxf)*. 2018 Jun;40(2):e151–6.
25. Cochrane T, Gidlow CJ, Kumar J, et al. Cross-sectional review of the response and treatment uptake from the NHS Health Checks programme in Stoke on Trent. *J Public Health (Oxf)*. 2013 Mar;35(1):92–8.
26. Attwood S, Morton K, Sutton S. Exploring equity in uptake of the NHS Health Check and a nested physical activity intervention trial. *J Public Health (Oxf)*. 2016 Sep;38(3):560–8.
27. Chang KC-M, Soljak M, Lee JT, et al. Coverage of a national cardiovascular risk assessment and management programme (NHS Health Check): Retrospective database study. *Prev Med (Baltim)*. 2015 Sep;78:1–8.
28. Coghill N, Garside L, Montgomery AA, et al. NHS health checks: a cross-sectional observational study on equity of uptake and outcomes. *BMC Health Serv Res*. 2018 Apr;18(1):238.
29. Carter P, Bodicoat DH, Davies MJ, et al. A retrospective evaluation of the NHS Health Check Programme in a multi-ethnic population. *J Public Health (Oxf)*. 2016 Sep;38(3):534–42.
30. Smith S, Waterall J, Burden ACF. An evaluation of the performance of the NHS Health Check programme in



identifying people at high risk of developing type 2 diabetes. *BMJ Open*. 2013 Mar;3(3).

31. Taylor F, Huffman MD, Macedo AF, et al. Statins for the primary prevention of cardiovascular disease. In: Huffman MD, editor. *Cochrane Database of Systematic Reviews* [Internet]. Chichester, UK: John Wiley & Sons, Ltd; 2013 [cited 2017 Dec 3]. Available from: <http://doi.wiley.com/10.1002/14651858.CD004816.pub5>
32. Cochrane T, Davey R, Iqbal Z, et al. NHS health checks through general practice: randomised trial of population cardiovascular risk reduction. *BMC Public Health* [Internet]. 2012;12(1):944. Available from: <http://bmcpublichealth.biomedcentral.com/articles/10.1186/1471-2458-12-944>
33. NICE guidelines [CG127]. Available at: <https://www.nice.org.uk/guidance/cg127> (Accessed: 16 March 2018).
34. Woringer M, Cecil E, Watt H, et al. Evaluation of community provision of a preventive cardiovascular programme - the National Health Service Health Check in reaching the under-served groups by primary care in England: cross sectional observational study. *BMC Health Serv Res*. 2017 Jun;17(1):405.
35. Usher-Smith JA, Harte E, MacLure C, et al. Patient experience of NHS health checks: a systematic review and qualitative synthesis. *BMJ Open*. 2017 Aug;7(8):e017169.
36. Riley R, Coghill N, Montgomery A, et al. Experiences of patients and healthcare professionals of NHS cardiovascular health checks: a qualitative study. *J Public Health (Oxf)*. 2016 Sep;38(3):543–51.
37. Sallis A, Bunten A, Bonus A, et al. The effectiveness of an enhanced invitation letter on uptake of National Health Service Health Checks in primary care: a pragmatic quasi-randomised controlled trial. *BMC Fam Pract* [Internet]. 2016;17(1):35. Available from: <https://doi.org/10.1186/s12875-016-0426-y>

### Declaration of competing interests

All authors have completed the ICMJE uniform disclosure form at [www.icmje.org/coi\\_disclosure.pdf](http://www.icmje.org/coi_disclosure.pdf) and declare: no support from any organisation for the submitted work; no financial relationships with any organisations that might have an interest in the submitted work in the previous three years; no other relationships or activities that could appear to have influenced the submitted work.

### Ethics approval

This study received ethical approval from the Research Ethics Committee at the University of Southampton ID: 24358) and approval from the Hampshire Health Record Information Governance Group.

### Contributorship

The corresponding author attests that all listed authors meet authorship criteria and that no others meeting the criteria have been omitted. All authors conceived and designed the study; FS performed the data acquisition from the Hampshire Health Record Database and OJK performed the data analysis; OJK and FS drafted the manuscript which was reviewed and amended by all authors. All authors, external and internal, had full access to all of the data (including statistical reports and tables) in the study and can take responsibility for the integrity of the data and the accuracy of the data analysis. PR is guarantor.

### Copyright

The Corresponding Author has the right to grant on behalf of all authors and does grant on behalf of all authors, a worldwide licence to the Publishers and its licensees in perpetuity, in all forms, formats and media (whether known now or created in the future), to i) publish, reproduce, distribute, display and store the Contribution, ii) translate the Contribution into other languages, create adaptations, reprints, include within collections and create summaries, extracts

1 and/or, abstracts of the Contribution, iii) create any other derivative work(s) based on the Contribution, iv) to exploit all  
2 subsidiary rights in the Contribution, v) the inclusion of electronic links from the Contribution to third party material where-  
3 ever it may be located; and, vi) licence any third party to do any or all of the above.  
4  
5

### 6 **Funding**

7  
8 This research received no specific grant from any funding agency in the public, commercial or not-for-profit sectors.  
9

### 10 **Transparency declaration**

11 PR affirms that the manuscript is an honest, accurate, and transparent account of the study being reported; that no  
12 important aspects of the study have been omitted; and that any discrepancies from the study as planned (and, if relevant,  
13 registered) have been explained.  
14  
15  
16  
17  
18  
19

### 20 **Data sharing**

21 No additional data are available.  
22  
23  
24  
25  
26  
27  
28  
29  
30  
31  
32  
33  
34  
35  
36  
37  
38  
39  
40  
41  
42  
43  
44  
45  
46  
47  
48  
49  
50  
51  
52  
53  
54  
55  
56  
57  
58  
59  
60



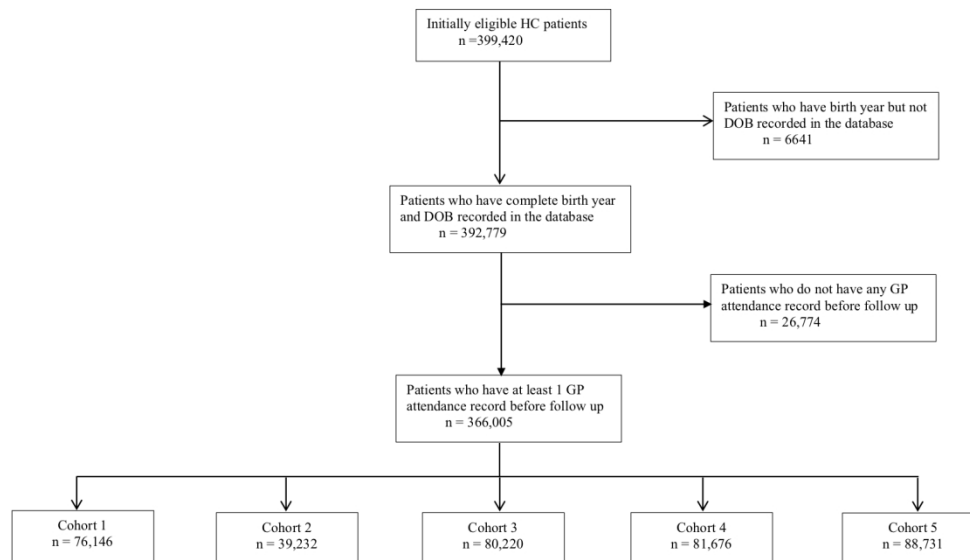

Figure 1. Derivation of the study population and five cohorts included in this study. Cohorts 1-4 were invited for HCs in the years beginning 1st April 2011, 12, 13 and 14 respectively, while cohort 5, which was the control group, was not invited.

146x83mm (300 x 300 DPI)

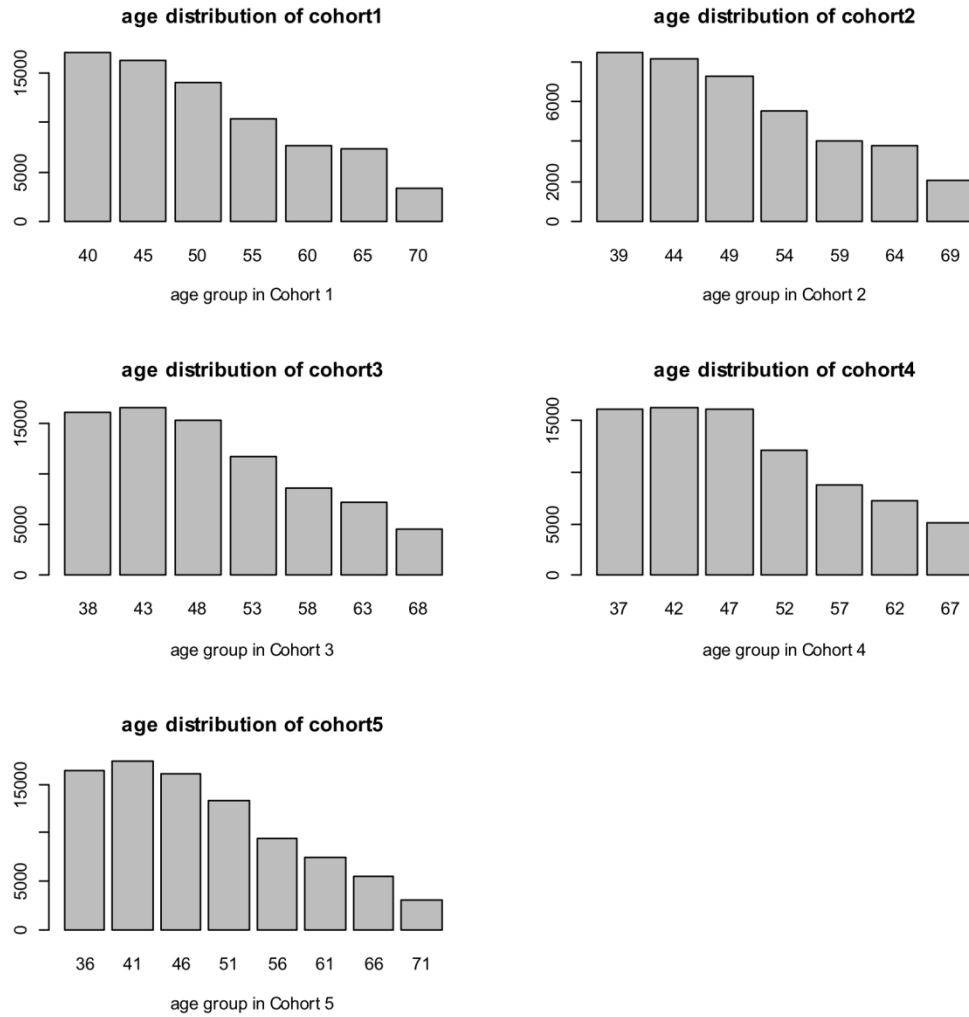

Figure 2. Histograms showing the distribution of ages within the five cohorts.

150x158mm (300 x 300 DPI)

# BMJ Open

## Evaluating the Effectiveness of the NHS Health Check Programme in South England: a Quasi-Randomised Controlled Trial

|                                 |                                                                                                                                                                                                                                                                                                                                                 |
|---------------------------------|-------------------------------------------------------------------------------------------------------------------------------------------------------------------------------------------------------------------------------------------------------------------------------------------------------------------------------------------------|
| Journal:                        | <i>BMJ Open</i>                                                                                                                                                                                                                                                                                                                                 |
| Manuscript ID                   | bmjopen-2019-029420.R1                                                                                                                                                                                                                                                                                                                          |
| Article Type:                   | Research                                                                                                                                                                                                                                                                                                                                        |
| Date Submitted by the Author:   | 05-Jun-2019                                                                                                                                                                                                                                                                                                                                     |
| Complete List of Authors:       | Kennedy, Oliver; University of Southampton Faculty of Medicine, Su, Fangzhong; NHS South, Central and West Commissioning Support Unit<br>Pears, Robert; Public Health Directorate, Hampshire County Council<br>Walmsley, Emily; University of Southampton Faculty of Medicine<br>Roderick, Paul; University of Southampton, Faculty of Medicine |
| <b>Primary Subject Heading</b>: | Cardiovascular medicine                                                                                                                                                                                                                                                                                                                         |
| Secondary Subject Heading:      | General practice / Family practice                                                                                                                                                                                                                                                                                                              |
| Keywords:                       | health checks, cardiovascular risk management, cardiovascular risk screening, population screening                                                                                                                                                                                                                                              |
|                                 |                                                                                                                                                                                                                                                                                                                                                 |

SCHOLARONE™  
Manuscripts

# **Evaluating the Effectiveness of the NHS Health Check Programme in South England: a Quasi-Randomised Controlled Trial**

O. J. Kennedy<sup>1</sup> \* (0000-0001-7907-9118), F. Su<sup>2</sup>, R. Pears<sup>3</sup>, E Walmsley<sup>1</sup>, P. Roderick<sup>1</sup>

1. Primary Care & Population Sciences Faculty of Medicine, University of Southampton, Southampton, UK

O. J. Kennedy, Visiting Research Fellow

E Walmsley, Public Health Registrar

P. Roderick, Professor of Public Health

2. NHS South, Central and West Commissioning Support Unit, Eastleigh, Hampshire, UK

F. Su, Principal Information Analyst

3. Public Health Directorate, Hampshire County Council, Hampshire, UK

R. Pears, Public Health Consultant

Correspondence to: Oliver Kennedy at Primary Care & Population Sciences, Faculty of Medicine, University of Southampton, Southampton General Hospital, Mailpoint 801, South Academic Block, Tremona Road, Southampton, SO16 6YD (email: [ok4g13@soton.ac.uk](mailto:ok4g13@soton.ac.uk))

Word count: 5170

## **ABSTRACT**

**Objectives:** Evaluate uptake, risk factor detection and management from the National Health Service (NHS) Health Check (HC).

**Design:** Quasi-randomised controlled trial wherein participants were allocated to five cohorts based on birth year. Four cohorts were invited for an NHS HC between April 2011 and March 2015.

**Setting:** 151 General Practices in Hampshire, England, United Kingdom.

**Participants:** 366,005 participants born 1/4/1940 – 31/3/1976 eligible for an NHS HC.

**Intervention:** Invitation for an NHS HC.

**Main outcome measures:** Absolute percentage changes and odds ratios (ORs) of (i) detection of cardiovascular (CVD) 10-year risk scores >10% and >20%, current smokers, total cholesterol (TC) >5.5 mmol/L and >7.5 mmol/L; (ii) new diagnoses of hypertension, type 2 diabetes mellitus (T2DM), chronic kidney disease (CKD) and atrial fibrillation (AF); and (iii) new interventions with statins, antihypertensives, antiglycaemics and nicotine replacement therapy (NRT).

**Results:** HC attendance rose from 12% to 30% between 2011/12 and 2014/15. HC invitation increased detection of CVD risk scores >10% (2.0%-3.6), TC >5.5 mmol/L (4.1%-7.0%) and >7.5 mmol/L (0.3%-0.4%), hypertension diagnoses (0.3%-0.6%), and interventions with statins (0.3%-1.0%) and antihypertensives (0.1%-0.6%). There were no consistent differences in detection of CVD risk >20% or current smokers, NRT, or diagnoses of diabetes, AF or CKD. Multivariate analyses showed associations between HC invitation and detection of CVD risk >10% (OR 8.01, 95% CI 7.34-8.73), >20% (5.86, 4.83-7.10), TC >5.5 mmol/L (3.72, 3.57-3.89), >7.5 mmol/L (2.89, 2.46-3.38), and diagnoses of hypertension (1.33, 1.20-1.47) and diabetes (1.34, 1.12-1.61). ORs of CVD risk >10% plus statin and >20% plus statin, respectively, were 2.90 (2.36-3.57) and 2.60 (1.92-3.52), and hypertension plus antihypertensive was 1.33 (1.18-1.50). There were no associations with AF, CKD, antiglycaemics or NRT. Detection of several risk factors varied inversely by deprivation.

**Conclusions:** HC invitation increased detection of cardiovascular risk factors, but corresponding increases in evidence-based interventions were modest.

### **STRENGTHS AND LIMITATIONS OF THIS STUDY**

- This is the first study to investigate outcomes associated with invitation for a National Health Service Health Check using a quasi-randomised method together with an intention-to-treat analysis.
- This study included a large population of 366,005 participants in a mixture of urban, semi-urban and rural settings.
- Invitation for a Health Check increased detection of cardiovascular risk factors, but this translated into only modest increases in evidence-based interventions.
- The follow-up of 6 months to 3.5 years limited assessment of patient relevant outcomes (e.g. incident cardiovascular disease).
- There was insufficient information to consider outcomes related to alcohol consumption and diet.

## **INTRODUCTION**

Cardiovascular disease (CVD) is a significant cause of mortality and morbidity worldwide,[1] and results in substantial global healthcare expenditure.[2] In 2009, the National Health Service (NHS) in England began a Health Check (HC) programme with the intention of identifying and managing individuals at higher risk of CVD or related conditions, such as diabetes mellitus and kidney disease, and preventing such conditions. This is similar to national programmes in other countries including in Canada[3] and the United States.[4] Modelling by the UK Department of Health suggested that the NHS HC programme could prevent 1,600 strokes and heart attacks each year, although the modelling assumptions, particularly with regard to uptake, may have overestimated effectiveness.[5] More recent estimation of the health benefits from microsimulation modelling using existing programme data suggest that the NHS HC programme results in approximately 300 fewer deaths and 1,000 people living free from disease (ischaemic heart disease, stroke, dementia and lung cancer) each year in England.[6]

Patients that are eligible to participate in the NHS HC programme are invited for HCs every five years. Patients are eligible if they are aged 40-74 and have no known CVD, diabetes, kidney disease or previous treatment with statins. The HC itself is performed in primary care, largely in general practice, and comprises an assessment of smoking status, diet, exercise, family history and more recently alcohol intake. Measurements are taken of body mass index (BMI), waist circumference, blood pressure (BP) and cholesterol, and a 10 year CVD risk score is calculated. Patients with systolic BP (SBP) or diastolic BP (DBP)  $\geq 140$  mmHg or 90 mmHg, respectively, have additional blood tests to measure kidney function. If impaired kidney function is detected, that is an estimated glomerular filtration rate (eGFR)  $< 60$  ml/min/1.73 m<sup>2</sup>, the blood test is repeated within two weeks to confirm a diagnosis of chronic kidney disease (CKD).[7] Any HC attendee with BMI  $\geq 30$  kg/m<sup>2</sup> ( $\geq 25$  kg/m<sup>2</sup> in non-white ethnic groups) or SBP or DBP above  $\geq 140$  mmHg or 90 mmHg, respectively, are also screened for type 2 diabetes mellitus (T2DM) by measuring glycated hemoglobin (HbA1c) or fasting glucose. If CVD risk factors are newly identified or conditions newly diagnosed during the HC, patients are offered appropriate management, including lifestyle advice, treatments and referrals to local services.

The HC programme has been contentious from its inception. There have been concerns of a lack of proven effectiveness to justify the yearly expenditure,[8] which is thought to be around £450 million.[9] A systematic review of randomised controlled trials found that general health checks provide no overall

1  
2  
3 reduction in CVD or cancer mortality, only an increase in risk factor recording and diagnoses.[10] The  
4 initial implementation of the NHS HC programme suffered early problems, such as low uptake,[11]  
5 variable implementation,[12] and poor understanding of the aims and purpose of the HC among some  
6 invitees.[13] In addition, there were concerns about inequitable distribution of the HC and a resultant  
7 widening of health inequalities.[9] Proponents of the NHS HC programme argue that existing  
8 randomised trials, the most recent of which started in 1999, are not representative of more effective  
9 modern HCs and intervention strategies.[14] In addition, since the early years, participation has  
10 increased, with a 2018 study reporting that 48.2% of those invited for a HC have now attended.[15]  
11 Strategies have also increased uptake among some deprived and ethnic minority populations to or  
12 above the average.[16]

13  
14 A number of studies have evaluated the effectiveness of the NHS HC programme.[16,17] HC  
15 attendance has been associated with increased CVD risk factor recording, detection of  
16 hypercholesterolaemia and hypertension, and increased prescribing of statins comparing attendees  
17 and matched non-attendees (hazard ratio [HR] 1.58, 95% 1.53–1.63) and antihypertensives (HR 1.06,  
18 95% 1.03–1.10).[17] HC attendees have also been shown to have reduced CVD risk scores, blood  
19 pressures and serum lipids a year afterwards.[18] However, a significant limitation of existing studies is  
20 that they have used observational data comparing HC attendees and non-attendees. Only a proportion  
21 of those invited for a HC actually attend, and those attending are not representative of the eligible  
22 population.[16,17] This study aims to evaluate the effect of invitation for a HC (i.e. not just attendance)  
23 in terms of uptake and risk factor detection and management in eligible participants.

## 24 **METHODS**

### 25 **Study population and data source**

26  
27 This study took place in Hampshire, a region in the south of England comprising over 1.5 million  
28 residents in a mixture of urban, suburban and rural settings. In Hampshire, the HC is commissioned by  
29 three Local Authorities: Southampton City Council, Portsmouth City Council and Hampshire County  
30 Council. The two largest urban areas in Hampshire are the cities of Southampton and Portsmouth, each  
31 with a population of around 200,000-250,000. There were 151 General Practices that contributed data  
32 to this study, around 80% of the total in the region. The organisation of the HC programme in Hampshire  
33 involved assigning eligible patients into five separate cohorts. Cohort assignment was based on date  
34  
35  
36  
37  
38  
39  
40  
41  
42  
43  
44  
45  
46  
47  
48  
49  
50  
51  
52  
53  
54  
55  
56  
57  
58  
59  
60



1  
2  
3 of birth (DOB), although the cohorts had comparable means and distributions of ages. This method of  
4 assignment (i.e. based on birth year) constituted a form of “quasi-randomisation”.[19] Specifically,  
5 patients with years of birth ending in “0” or “5” were assigned to one cohort, “1” or “6” to another cohort,  
6 “2” or “7” to another and so forth, mirroring the quinquennial invitation system used for NHS breast  
7 cancer screening. The first cohort (cohort 1) was invited for a HC in the year 1<sup>st</sup> April 2011 to 31<sup>st</sup> March  
8 2012, while the subsequent cohorts (cohorts 2-5) were invited in the years beginning 1<sup>st</sup> April 2012-15.  
9 The study period was from 1<sup>st</sup> April 2011 to 31<sup>st</sup> March 2015. During this time, cohorts 1-4 were invited  
10 for HCs. Cohort 5 was eligible for a HC but not invited (i.e. until after the follow-up period ended) and  
11 was our control group. We compared outcomes in each of the invited cohorts 1-4 separately against  
12 those in cohort 5. The exact follow-up periods depended on the cohorts being compared and are  
13 described below.

14  
15 The population for this study were eligible for a HC on 1<sup>st</sup> April 2011. This required a DOB between 1<sup>st</sup>  
16 April 1940 - 31<sup>st</sup> March 1976 and (as of 1<sup>st</sup> April 2011) (i) no history of vascular disease (e.g. coronary  
17 artery disease, cerebrovascular disease, atherosclerosis, peripheral vascular disease (PVD) or  
18 circulatory system disease); (ii) no previous diagnosis of hypertension, diabetes, CKD, atrial fibrillation  
19 (AF), heart failure (HF), stroke or transient ischaemic attack (TIA); and (iii) no pre-existing records of  
20 receiving statins prescription, palliative care, a health check, or CVD risk assessment. These medical  
21 eligibility criteria matched the criteria used locally by general practices (GPs) to identify and invite  
22 participants to participate in the HC programme. The Read Codes for eligibility and outcomes are  
23 included as supplementary information. Using the participants DOBs, we assigned them into cohorts  
24 1-5 to identify the years they were invited for a HC between 1<sup>st</sup> April 2011 and 31<sup>st</sup> March 2015 (or not  
25 invited in the case of cohort 5). As is explained below, for some analyses, we reapplied the eligibility  
26 criteria to identify participants still eligible for a HC at the start of each invitation year.

27  
28 As there was a temporary pause in sending out HC invitations during the first half of the year beginning  
29 1<sup>st</sup> April 2012 in the Hampshire County Council Local Authority, we excluded patients belonging to  
30 cohort 2 living in that area (~40,000 participants). We excluded patients with no recorded DOB (6,641)  
31 or no GP attendance record before 1<sup>st</sup> April 2011 (26,774), as we assumed that those patients had  
32 moved into the area after the start of the follow-up. We excluded patients with medical records not  
33 formatted according to Read Codes Version 2 (~70,000). In total, we excluded around 35% of the  
34 population.

1  
2  
3 We acquired data for this study from the Hampshire Health Record Analytical database (HHRA). At the  
4 time of the study, the HHRA linked anonymised clinical records from 151 primary care practices,  
5 secondary care (e.g. inpatient, outpatient, and accident and emergency) from 3 acute (hospital) NHS  
6 trusts, and laboratory and pathology tests. The HHRA also contained deprivation indices for the  
7 populations served by the included GP practices. The HHRA covers a registered population of around  
8 1.5 million patients. Unfortunately, the organisation of the HHRA is such that some patients who die are  
9 removed from the database. As such, we did not use mortality or CVD events, which frequently result  
10 in death, as outcomes.  
11  
12  
13  
14  
15  
16  
17

### 18 **Information extracted and outcome measures**

19  
20 For each participant, we extracted from HHRA data concerning HC attendance, age, gender and  
21 individual level deprivation (IMD) at baseline. Ethnicity was poorly recorded (50% missing) and, in any  
22 case, this information was not released for analysis due to concerns about identifiability. We extracted  
23 data for the following outcomes: (i) recording of BP, total serum cholesterol (TC), smoking status (i.e.,  
24 “current smoker”, “ex-smoker”, and “never smoker”), BMI, and 10-year CVD risk score (e.g.  
25 Framingham and QRISK); (ii) detection of CVD risk score >10%, CVD risk score >20%, current smoker,  
26 TC >5.5 mmol/L, TC >7.5 mmol/L, and BMI >30 kg/m<sup>2</sup>; (iii) new diagnoses of hypertension, AF, diabetes  
27 and CKD (≥ stage 3); and (iv) new interventions with statins, antihypertensives, antiglycaemic  
28 medication, nicotine replacement therapy (NRT), anti-obesity medication, stop-smoking advice/referral  
29 and weight management advice/referral. We identified outcomes only where corresponding Read  
30 Codes had been recorded (e.g. we did not assume that BMI had been measured just because a weight  
31 management referral had been made). Data were extracted from the HHRA in January 2017.  
32  
33  
34  
35  
36  
37  
38  
39  
40  
41  
42  
43  
44

### 45 **Follow-up periods and statistical analysis**

46  
47 For each cohort overall and for HC attendees / non-attendees within each cohort separately, we  
48 calculated baseline means and standard deviations of age, gender and IMD. We calculated proportions  
49 (%) with outcomes occurring between 1<sup>st</sup> April 2011 and 31<sup>st</sup> March 2015. We calculated absolute  
50 differences in these proportions for each of cohorts 1-4 vs. 5 (i.e. invited vs non-invited) as well as the  
51 range (i.e. of absolute differences for cohorts 1-4 vs. 5). We also compared proportions with outcomes  
52 among attendees and non-attendees. Given the large sample sizes, p-values for differences in  
53 proportions were generally highly significant and, thus, not reported.  
54  
55  
56  
57  
58  
59  
60

1  
2  
3 In the second stage of our analysis, we calculated odds ratios (ORs) for each outcome. We employed  
4 multivariable logistic regression models adjusted for age and gender. We calculated ORs for each  
5 invited cohort (i.e. cohorts 1-4) separately, with the reference being uninvited cohort 5. The rationale  
6 for this approach was to capture changes in performance over a time period when awareness and  
7 experience among patients and providers was increasing. Evaluation of earlier years (e.g. cohort 1) is  
8 still of interest because of longer follow-up, but the most recently invited cohort (i.e. cohort 4) may be  
9 most reflective of current practice. Finally, to examine whether the impact of the programme differed  
10 by deprivation, we re-ran the regression analysis for the most recently invited cohort (i.e. cohort 4) vs.  
11 uninvited cohort 5 while including an interaction term for IMD.  
12  
13  
14  
15  
16  
17  
18  
19

20 All analyses were by intention-to-treat. We did sensitivity analysis by excluding those who attended  
21 opportunistically. In these analyses, follow-up was from the start of the invitation year of the invited  
22 cohort until 31<sup>st</sup> March 2015. Specifically, for cohorts 1-4 vs. 5, follow-up periods were from 1<sup>st</sup> April  
23 2011, 1<sup>st</sup> April 2012, 1<sup>st</sup> April 2013, 1<sup>st</sup> April 2014, respectively, until 31<sup>st</sup> March 2015. We included only  
24 participants still eligible at the start of the invitation year. As invitations were sent out throughout each  
25 year rather than all at the start, participants were invited on average six months from the start of their  
26 invitation years. This corresponds to follow-up periods for comparisons of cohorts 1-4 vs. 5, respectively,  
27 of 3.5, 2.5, 1.5 and 0.5 years. This study received ethical approval from the Research Ethics Committee  
28 at the University of Southampton ID: 24358) and approval from the Hampshire Health Record  
29 Information Governance Group. Data extraction was implemented using SQL server 2008 R2, and  
30 statistical analyses were conducted using R (Version 3.5.1, R Foundation for Statistical Computing,  
31 Vienna, Austria).[20]  
32  
33  
34  
35  
36  
37  
38  
39  
40  
41  
42  
43

#### 44 **Patient and public involvement**

45 There were no patients directly involved in the planning or design of this study.  
46  
47

### 48 **RESULTS**

#### 49 **Study sample and baseline characteristics**

50  
51 The derivation of the study population and five cohorts is shown in figure 1. 399,420 met our inclusion  
52 criteria and had medical records formatted as Read Codes Version 2. From those, we excluded 6,641  
53 without a recorded DOB and a further 26,774 patients without entries in their health records from before  
54 1<sup>st</sup> April 2011 who likely moved into Hampshire after the start of the follow-up period. The remaining  
55  
56  
57  
58  
59  
60

1  
2  
3 366,005 participants formed our study population. Table 1 summarises their baseline characteristics  
4 broken down into cohorts 1-5. The cohorts had similar proportions of male gender (within 1%) and mean  
5 deprivation scores (within one centile). The cohorts differed more markedly in mean age, although the  
6 maximum difference was just 3 years between cohorts 1 and 5. The age differences reflected the HC  
7 invitation system in Hampshire which, as is described above, is based on DOB. However, figure 2  
8 comprises histograms showing broadly similar distributions of ages within each cohort.  
9  
10  
11  
12  
13  
14  
15  
16  
17  
18  
19  
20  
21  
22  
23  
24  
25  
26  
27  
28  
29  
30  
31  
32  
33  
34  
35  
36  
37  
38  
39  
40  
41  
42  
43  
44  
45  
46  
47  
48  
49  
50  
51  
52  
53  
54  
55  
56  
57  
58  
59  
60

For peer review only

**Table 1.** Demographic information of the five cohorts overall and broken down into HC attendees and non-attendees within each cohort.

|                      | Cohort 1        |          |          | Cohort 2        |          |          | Cohort 3        |          |          | Cohort 4        |          |          | Cohort 5        |          |          |
|----------------------|-----------------|----------|----------|-----------------|----------|----------|-----------------|----------|----------|-----------------|----------|----------|-----------------|----------|----------|
|                      | All             | Att      | DNA      | All             | Att*     | DNA      |
| n                    | <b>76146</b>    | 9464     | 66682    | <b>39232</b>    | 9868     | 29364    | <b>80220</b>    | 19991    | 60229    | <b>81676</b>    | 21188    | 60488    | <b>88731</b>    | 4232     | 84499    |
| % male               | <b>47.5</b>     | 45.6     | 47.8     | <b>46.5</b>     | 40.7     | 48.3     | <b>47.0</b>     | 41.0     | 49.0     | <b>47.4</b>     | 41.9     | 49.3     | <b>47.2</b>     | 48.0     | 47.1     |
| Age range            | <b>(40, 70)</b> | (40, 70) | (40, 70) | <b>(39, 69)</b> | (39, 69) | (39, 69) | <b>(38, 68)</b> | (38, 68) | (38, 68) | <b>(37, 67)</b> | (37, 67) | (37, 67) | <b>(36, 71)</b> | (36, 71) | (36, 71) |
| Mean age (SD)        | <b>51(9.0)</b>  | 54(9.9)  | 50(8.7)  | <b>50(9.1)</b>  | 53(9.5)  | 49(8.7)  | <b>49(9.0)</b>  | 52(9.6)  | 48(8.6)  | <b>48(9.9)</b>  | 51(9.4)  | 47(8.8)  | <b>48(9.5)</b>  | 59(10.4) | 48(9.5)  |
| Mean IMD decile (SD) | <b>7.3(2.6)</b> | 7.8(2.4) | 7.3(2.6) | <b>7.3(2.6)</b> | 7.9(2.3) | 7.2(2.7) | <b>7.3(2.6)</b> | 7.7(2.4) | 7.2(2.7) | <b>7.3(2.6)</b> | 7.7(2.4) | 7.2(2.7) | <b>7.3(2.6)</b> | 7.5(2.6) | 7.3(2.6) |

Attended (Att), number (n), did not attend (DNA), standard deviation (SD), Index of Multiple Deprivation (IMD - 1 = most deprived decile, 10 = least deprived), \*some participants in cohort 5 attended a HC opportunistically (i.e. without receiving a formal invitation)

1  
2  
3 HC attendees in all cohorts were more likely to be female, older and less deprived compared to those  
4 who did not attend (Table 1). Proportions within each invited cohort (i.e. cohorts 1-4) attending HCs  
5 increased year on year during the follow-up, and for cohorts 1-4 were 12%, 27%, 28% and 30%,  
6  
7 respectively. Despite not being formally invited, a number of patients in cohort 5 attended a HC during  
8  
9 the follow-up period. These patients had likely responded to local or national advertising for the HC  
10  
11 programme or had been offered HCs opportunistically by their GPs.  
12  
13

### 14 15 **Proportions of risk factor recording, detection, diagnoses and interventions**

16  
17 Table 2 summarises the proportions of patients with recording and detection of risk factors, new  
18  
19 diagnoses, and new interventions during the follow-up period, which varied by cohort. The results are  
20  
21 shown for each cohort overall and separately for attendees and non-attendees within each cohort.  
22  
23 Proportions generally increased year on year for cohorts 1-4, reflecting increasing attendance, and were  
24  
25 lowest in the uninvited cohort 5. There were increases in absolute proportions in invited cohorts 1-4  
26  
27 with recorded BP (range for cohorts 1-4 vs. 5 = 5.0%-7.9%), BMI (5.0%-13.4%), TC (8.4%-17.5%), CVD  
28  
29 risk (7.3%-19.6%) and smoking status (2.8%-7.0%). In addition, there was increased detection of CVD  
30  
31 risk >10% (2.0%-3.6%), SBP >140 / DBP >90 (0.9%-2.1%), BMI >30 kg/m<sup>2</sup> (0.8%-2.5%), TC >5.5  
32  
33 mmol/L (4.1%-7.0%) and TC >7.5 mmol/L (0.3%-0.4%). There were modest or no consistent differences  
34  
35 in proportions with detected CVD risk >20% (0.0%-0.6%) and current smoking (-0.2%-0.5%).  
36

37  
38 The proportions with detection of risk factors among those with recordings were lower in the invited  
39  
40 cohorts (i.e. 1-4) compared to uninvited cohort 5, particularly for CVD risk >10% (-11.5% - -2.8%), >20%  
41  
42 (-6.1% - -1.8%) and BMI >30 kg/m<sup>2</sup> (-2.8% - -1.1%). Even though smaller absolute numbers of high-  
43  
44 risk patients were identified by opportunistic testing, these data suggest a higher positive predictive  
45  
46 value of opportunistic testing compared to the HC, which may reflect different risk profiles of patients.  
47

48  
49 HC resulted in minor or no increases in proportions with new diagnoses of hypertension (0.3%-0.6%),  
50  
51 AF (0.0%-0.1%), CKD (0.1%) or diabetes (0.0%-0.1%). There were minor increases in proportions  
52  
53 receiving statins (0.3%-1.0%), antihypertensives (0.1%-0.6%) and stop smoking advice (0.4%-0.9%),  
54  
55 but no consistent difference in antiglycaemics (-0.1%-0.1%), NRT (0.0%) or anti-obesity medications  
56  
57 (0.0%). There was an increase in weight advice / referrals (4.6%-10.5%).  
58  
59  
60

**Table 2.** Proportions of participants with risk factor recording / detection, new diagnoses and new interventions in each of the five cohorts overall and for HC attendees and non-attendees within each cohort separately.

|                                                       | C1   |      |      | C2   |      |      | C3   |      |      | C4   |      |      | C5   |      |      |
|-------------------------------------------------------|------|------|------|------|------|------|------|------|------|------|------|------|------|------|------|
|                                                       | All  | Att  | DNA  |
| <b>RECORDING %</b>                                    |      |      |      |      |      |      |      |      |      |      |      |      |      |      |      |
| BP                                                    | 72.3 | 98.6 | 68.5 | 75.2 | 98.6 | 67.3 | 74.3 | 98.7 | 66.3 | 73.3 | 98.6 | 64.4 | 67.3 | 99.1 | 65.7 |
| BMI                                                   | 48.4 | 97.7 | 41.4 | 56.5 | 98.5 | 42.3 | 56.5 | 98.5 | 42.5 | 56.8 | 98.6 | 42.2 | 43.4 | 98.0 | 40.6 |
| TC                                                    | 41.5 | 97.6 | 33.6 | 49.5 | 97.1 | 33.6 | 49.4 | 97.0 | 33.6 | 50.6 | 97.2 | 34.2 | 33.1 | 96.1 | 30.0 |
| CVD risk                                              | 23.0 | 89.0 | 13.7 | 32.8 | 89.4 | 13.8 | 33.2 | 89.1 | 14.7 | 35.3 | 92.3 | 15.3 | 15.7 | 90.2 | 11.9 |
| Smoking status                                        | 71.8 | 98.5 | 68.1 | 75.8 | 98.9 | 68.0 | 75.7 | 98.7 | 68.1 | 76.0 | 98.4 | 68.2 | 69.0 | 98.7 | 67.6 |
| <b>DETECTION %</b>                                    |      |      |      |      |      |      |      |      |      |      |      |      |      |      |      |
| CVD risk >10%                                         | 7.7  | 29.0 | 4.7  | 9.3  | 23.0 | 4.7  | 9.0  | 22.2 | 4.6  | 8.8  | 20.7 | 4.6  | 5.7  | 44.5 | 3.8  |
| % of CVD risk recorded with >10%                      | 33.6 | 32.6 | 34.5 | 28.4 | 25.7 | 34.3 | 27.0 | 24.9 | 31.1 | 24.9 | 22.5 | 30.1 | 36.4 | 49.3 | 31.5 |
| CVD risk >20%                                         | 2.2  | 8.1  | 1.3  | 2.4  | 5.2  | 1.4  | 2.1  | 4.4  | 1.3  | 1.8  | 3.6  | 1.2  | 1.8  | 15.0 | 1.1  |
| % of CVD risk recorded with >20%                      | 9.4  | 9.1  | 9.6  | 7.2  | 5.8  | 10.1 | 6.3  | 5.0  | 9.1  | 5.1  | 3.9  | 7.8  | 11.2 | 16.6 | 9.1  |
| SBP >140 or DBP > 90 mmHg                             | 17.8 | 24.6 | 16.8 | 17.5 | 20.1 | 16.6 | 17.3 | 20.6 | 16.3 | 16.6 | 19.7 | 15.6 | 15.7 | 29.9 | 14.9 |
| % of BP recorded with >140 or >90                     | 24.6 | 25.0 | 24.5 | 23.3 | 20.4 | 24.7 | 23.3 | 20.8 | 24.5 | 22.7 | 20.0 | 24.2 | 23.3 | 30.2 | 22.7 |
| Current smoker                                        | 20.7 | 17.0 | 21.2 | 20.8 | 14.6 | 22.8 | 20.9 | 14.4 | 23.1 | 21.4 | 16.3 | 23.2 | 20.9 | 18.4 | 21.1 |
| % of smoking status recorded who currently smoke      | 28.8 | 17.3 | 31.1 | 27.4 | 14.8 | 33.6 | 27.6 | 14.6 | 33.9 | 28.2 | 16.6 | 34.1 | 30.3 | 18.6 | 31.2 |
| BMI >30 kg/m <sup>2</sup>                             | 12.6 | 18.0 | 11.9 | 13.9 | 17.6 | 12.7 | 13.8 | 17.9 | 12.4 | 14.3 | 19.7 | 12.3 | 11.8 | 20.1 | 11.4 |
| % BMI recoded with >30                                | 26.1 | 18.5 | 28.7 | 24.7 | 17.9 | 30.0 | 24.4 | 18.2 | 29.1 | 25.1 | 20.0 | 29.2 | 27.2 | 20.5 | 28.0 |
| TC >5.5 mmol/L                                        | 19.1 | 44.1 | 15.5 | 22.0 | 43.1 | 14.9 | 21.4 | 41.4 | 14.8 | 21.6 | 39.8 | 15.2 | 15.0 | 48.8 | 13.3 |
| % of TC recorded with >5.5 mmol/L                     | 46.0 | 45.2 | 46.2 | 44.3 | 44.4 | 44.3 | 43.3 | 42.7 | 43.9 | 42.7 | 40.9 | 44.4 | 45.3 | 50.8 | 44.4 |
| TC >7.5 mmol/L                                        | 1.4  | 2.7  | 1.2  | 1.5  | 2.4  | 1.2  | 1.5  | 2.5  | 1.1  | 1.5  | 2.3  | 1.3  | 1.1  | 3.3  | 1.0  |
| % of TC recorded with >7.5 mmol/L                     | 3.3  | 2.8  | 3.6  | 3.1  | 2.5  | 3.6  | 3.0  | 2.6  | 3.3  | 3.1  | 2.4  | 3.8  | 3.4  | 3.4  | 3.4  |
| <b>DIAGNOSES %</b>                                    |      |      |      |      |      |      |      |      |      |      |      |      |      |      |      |
| Hypertension                                          | 4.2  | 4.7  | 4.1  | 4.1  | 3.7  | 4.3  | 3.9  | 3.0  | 4.2  | 4.0  | 2.5  | 4.5  | 3.6  | 6.5  | 3.5  |
| % of SBP >140 or DBP > 90 with hypertension diagnosis | 18.0 | 15.1 | 18.7 | 17.7 | 13.6 | 19.3 | 17.5 | 11.5 | 20.1 | 17.8 | 9.3  | 21.6 | 17.3 | 16.4 | 17.4 |
| AF                                                    | 0.5  | 0.5  | 0.5  | 0.4  | 0.4  | 0.4  | 0.4  | 0.4  | 0.5  | 0.4  | 0.2  | 0.4  | 0.4  | 0.9  | 0.3  |
| CKD                                                   | 0.3  | 0.3  | 0.3  | 0.3  | 0.4  | 0.3  | 0.3  | 0.2  | 0.3  | 0.3  | 0.1  | 0.3  | 0.2  | 0.6  | 0.2  |
| Diabetes                                              | 1.3  | 0.9  | 1.3  | 1.2  | 0.7  | 1.4  | 1.3  | 0.6  | 1.5  | 1.3  | 0.6  | 1.6  | 1.2  | 1.2  | 1.2  |
| <b>INTERVENTIONS %</b>                                |      |      |      |      |      |      |      |      |      |      |      |      |      |      |      |
| Statin                                                | 4.9  | 7.7  | 4.5  | 5.0  | 5.6  | 4.8  | 4.4  | 4.5  | 4.4  | 4.3  | 3.3  | 4.6  | 4.0  | 13.0 | 3.6  |
| % of CVD>10% prescribed statins                       | 22.5 | 16.5 | 27.8 | 18.8 | 12.7 | 28.8 | 17.6 | 11.4 | 27.5 | 16.2 | 9.3  | 27.0 | 23.6 | 19.0 | 26.2 |
| % of CVD>20% prescribed statins                       | 40.7 | 31.5 | 48.8 | 37.9 | 28.7 | 49.4 | 38.2 | 27.4 | 50.2 | 36.5 | 23.0 | 50.8 | 41.9 | 33.9 | 47.5 |
| Antihypertensive                                      | 7.6  | 8.0  | 7.5  | 7.7  | 6.9  | 7.9  | 7.3  | 6.1  | 7.7  | 7.2  | 5.8  | 7.7  | 7.1  | 10.6 | 6.9  |
| % of hypertensives prescribed antihypertensive        | 78.5 | 79.6 | 78.3 | 78.5 | 77.7 | 78.7 | 78.4 | 79.3 | 78.2 | 77.7 | 77.3 | 77.8 | 78.3 | 85.0 | 77.7 |
| Antiglycaemics                                        | 1.1  | 0.7  | 1.2  | 1.0  | 0.6  | 1.2  | 1.1  | 0.5  | 1.3  | 1.2  | 0.5  | 1.4  | 1.1  | 1.1  | 1.1  |
| % of diabetics prescribed antiglycaemics              | 74.2 | 66.7 | 74.9 | 74.4 | 66.7 | 75.7 | 74.9 | 60.5 | 76.9 | 73.2 | 59.2 | 75.1 | 76.7 | 73.1 | 76.9 |
| NRT                                                   | 1.1  | 0.9  | 1.1  | 1.1  | 0.9  | 1.2  | 1.1  | 0.8  | 1.2  | 1.1  | 0.8  | 1.2  | 1.1  | 1.2  | 1.1  |
| % of current smokers prescribed NRT                   | 4.6  | 4.7  | 4.5  | 4.7  | 5.2  | 4.6  | 4.7  | 5.1  | 4.7  | 4.6  | 4.4  | 4.6  | 4.6  | 6.2  | 4.6  |
| Stop smoking advice                                   | 7.4  | 9.9  | 7.1  | 7.9  | 8.5  | 7.8  | 7.6  | 7.7  | 7.5  | 7.7  | 8.4  | 7.5  | 7.0  | 10.3 | 6.9  |

|                                                       |             |      |      |             |      |      |             |      |      |             |      |      |             |      |      |
|-------------------------------------------------------|-------------|------|------|-------------|------|------|-------------|------|------|-------------|------|------|-------------|------|------|
| % of current smokers given advice                     | <b>22.8</b> | 26.8 | 22.4 | <b>23.7</b> | 24.5 | 23.5 | <b>22.7</b> | 23.5 | 22.6 | <b>22.7</b> | 23.8 | 22.5 | <b>22.3</b> | 25.3 | 22.1 |
| Weight advice/referral                                | <b>12.9</b> | 55.5 | 6.8  | <b>18.3</b> | 52.3 | 6.8  | <b>18.4</b> | 51.7 | 7.4  | <b>18.8</b> | 49.6 | 8.0  | <b>8.3</b>  | 55.7 | 5.9  |
| % of BMI>30 kg/m <sup>2</sup> given advice/referral   | <b>26.8</b> | 63.2 | 19.0 | <b>31.5</b> | 60.1 | 18.2 | <b>33.3</b> | 60.0 | 20.6 | <b>34.4</b> | 57.7 | 21.3 | <b>20.8</b> | 60.8 | 17.2 |
| Anti-obesity                                          | <b>0.3</b>  | 0.2  | 0.3  | <b>0.3</b>  | 0.2  | 0.4  | <b>0.3</b>  | 0.3  | 0.3  | <b>0.3</b>  | 0.3  | 0.3  | <b>0.3</b>  | 0.2  | 0.3  |
| % of BMI>30 kg/m <sup>2</sup> prescribed anti-obesity | <b>1.8</b>  | 1.0  | 2.0  | <b>2.0</b>  | 0.9  | 2.5  | <b>1.8</b>  | 1.2  | 2.1  | <b>1.8</b>  | 1.0  | 2.2  | <b>2.1</b>  | 0.7  | 2.2  |

Attended (Att), Blood pressure (BP), body mass index (BMI), total cholesterol (TC), cardiovascular disease (CVD), systolic blood pressure (SBP), diastolic blood pressure (DBP), atrial fibrillation (AF), chronic kidney disease (CKD), Nicotine replacement therapy (NRT)

For peer review only



1  
2  
3 Proportions receiving statins were lower among HC invited cohorts compared to non-invited following  
4 detection of CVD risk >10% (-7.4% - -1.1%) and >20% (-5.4% - -1.2%). Similarly, antiglycaemic  
5 interventions among new cases of diabetes were lower (-3.5% - -1.8%), as were new anti-obesity  
6 prescriptions following detection of BMI >30 kg/m<sup>2</sup> (-0.3% - -0.1%). Differences in proportions receiving  
7 antihypertensives following new hypertension diagnoses were inconsistent (-0.6% - 0.2%), but there  
8 was an increase in proportions among HC invitees receiving weight advice / referral following detection  
9 of BMI >30 kg/m<sup>2</sup> (6.0%-13.6%).  
10  
11

### 12 **Odds ratios of risk factor detection, diagnoses and interventions**

13  
14 Table 3 summarises the ORs and 95% confidence intervals from the regression analyses. Compared  
15 to uninvited cohort 5 (including and excluding those who attended opportunistically), the odds of  
16 detection of risk factors, new diagnoses and interventions were generally higher in invited cohorts 1-4,  
17 and they increased year on year throughout the study period. For cohort 4 vs. 5, there were large and  
18 significant increases in the odds of detecting CVD risk >10% (OR 8.01, 7.34-8.73), CVD risk >20% (OR  
19 5.86, 4.83-7.10) TC >5.5 mmol/L (OR 3.72, 3.57-3.89), TC >7.5 mmol/L (OR 2.89, 2.46-3.38) and BMI >  
20 30 kg/m<sup>2</sup> (OR 2.05, 1.96-2.14). These may be conservative given that the average follow-up was just 6  
21 months, and for some participants almost none, while many outcomes from the HC would likely take  
22 longer to occur. There were significant increases in detection of current smokers (OR 1.22, 1.18-1.26)  
23 and elevated BP (OR 1.64, 1.57-1.70). There were modest increases in new diagnoses of hypertension  
24 (OR 1.33, 1.20-1.47) and diabetes (OR 1.34, 1.12-1.61), but not AF (OR 1.00, 0.72-1.39) or CKD (OR  
25 0.69, 0.36-1.32). In terms of new interventions, there were increases in weight advice / referrals (OR  
26 8.36, 7.89-8.86), stop smoking advice (OR 1.65, 1.51-1.79), statins (OR 1.54, 1.39-1.71) and  
27 antihypertensives (OR 1.15, 1.06-1.24). The ORs of CVD risk >10% plus statin or >20% plus statin,  
28 respectively, were 2.90 (2.36-3.57) and 2.60 (1.92-3.52). The OR of hypertension diagnosis plus  
29 antihypertensive treatment was 1.33 (1.18-1.50). There were no significant differences in prescriptions  
30 of NRT (OR 0.92, 0.71-1.20), antiglycaemics (OR 1.18, 0.97-1.44) or anti-obesity medications (OR 1.00,  
31 0.68-1.48).  
32  
33  
34  
35  
36  
37  
38  
39  
40  
41  
42  
43  
44  
45  
46  
47  
48  
49  
50  
51  
52  
53  
54  
55  
56  
57  
58  
59  
60

**Table 3.** Age and gender adjusted odds ratios with 95% confidence intervals for associations between invitation for an NHS health check and the detection of CVD risk factors, new diagnoses and interventions. Results are shown for the comparisons of cohorts 1-4 against all of cohort 5 and against patients in cohort 5 who we confirmed did not attend (DNA) a HC incidentally.

|                           | Cohort1 vs       |                  | Cohort2 vs       |                  | Cohort3 vs       |                  | Cohort4 vs       |                     |
|---------------------------|------------------|------------------|------------------|------------------|------------------|------------------|------------------|---------------------|
|                           | Cohort5 All      | Cohort5 DNA         |
| <b>DETECTION %</b>        |                  |                  |                  |                  |                  |                  |                  |                     |
| CVD risk >10%             | 1.20 (1.15-1.25) | 1.71 (1.64-1.80) | 1.93 (1.82-2.04) | 2.66 (2.50-2.83) | 3.28 (3.08-3.50) | 3.98 (3.71-4.27) | 8.01 (7.34-8.73) | 11.17 (10.13-12.33) |
| CVD risk >20%             | 1.07 (0.99-1.15) | 1.49 (1.37-1.63) | 1.44 (1.29-1.61) | 1.90 (1.69-2.15) | 2.83 (2.48-3.23) | 3.12 (2.72-3.58) | 5.86 (4.83-7.10) | 7.18 (5.82-8.85)    |
| SBP >140 or DBP > 90 mmHg | 1.04 (1.01-1.07) | 1.06 (1.03-1.09) | 1.08 (1.05-1.12) | 1.10 (1.06-1.14) | 1.23 (1.19-1.27) | 1.26 (1.21-1.30) | 1.64 (1.57-1.70) | 1.69 (1.62-1.76)    |
| Current smoker            | 1.03 (1.01-1.06) | 1.03 (1.01-1.06) | 1.05 (1.02-1.09) | 1.05 (1.02-1.09) | 1.05 (1.02-1.08) | 1.05 (1.03-1.08) | 1.22 (1.18-1.26) | 1.23 (1.19-1.27)    |
| BMI >30 kg/m <sup>2</sup> | 1.09 (1.06-1.12) | 1.14 (1.11-1.18) | 1.26 (1.21-1.31) | 1.31 (1.26-1.36) | 1.46 (1.41-1.51) | 1.52 (1.47-1.58) | 2.05 (1.96-2.14) | 2.18 (2.09-2.28)    |
| TC >5.5 mmol/L            | 1.19 (1.16-1.23) | 1.33 (1.29-1.37) | 1.67 (1.61-1.72) | 1.83 (1.77-1.90) | 2.10 (2.03-2.17) | 2.27 (2.19-2.34) | 3.72 (3.57-3.89) | 4.20 (4.02-4.39)    |
| TC >7.5 mmol/L            | 1.12 (1.02-1.22) | 1.19 (1.08-1.30) | 1.42 (1.26-1.59) | 1.52 (1.35-1.71) | 1.66 (1.47-1.87) | 1.76 (1.56-1.99) | 2.89 (2.46-3.38) | 3.15 (2.67-3.72)    |
| <b>DIAGNOSES %</b>        |                  |                  |                  |                  |                  |                  |                  |                     |
| HTN                       | 1.04 (0.99-1.09) | 1.03 (0.98-1.09) | 1.06 (0.98-1.14) | 1.04 (0.97-1.12) | 1.10 (1.02-1.19) | 1.10 (1.02-1.19) | 1.33 (1.20-1.47) | 1.34 (1.20-1.48)    |
| AF                        | 1.14 (0.98-1.32) | 1.11 (0.95-1.30) | 0.91 (0.72-1.14) | 0.89 (0.71-1.13) | 1.33 (1.06-1.67) | 1.31 (1.05-1.65) | 1.00 (0.72-1.39) | 1.01 (0.72-1.40)    |
| CKD                       | 1.01 (0.84-1.22) | 0.98 (0.81-1.19) | 1.22 (0.93-1.61) | 1.18 (0.90-1.57) | 1.08 (0.77-1.51) | 1.06 (0.76-1.49) | 0.69 (0.36-1.32) | 0.68 (0.36-1.30)    |
| Diabetes                  | 0.99 (0.91-1.08) | 0.97 (0.88-1.06) | 0.95 (0.84-1.09) | 0.94 (0.82-1.07) | 1.12 (0.99-1.28) | 1.12 (0.98-1.27) | 1.34 (1.12-1.61) | 1.36 (1.13-1.64)    |
| <b>INTERVENTIONS %</b>    |                  |                  |                  |                  |                  |                  |                  |                     |
| Statin                    | 1.06 (1.01-1.11) | 1.12 (1.06-1.18) | 1.17 (1.09-1.25) | 1.21 (1.13-1.30) | 1.26 (1.16-1.35) | 1.27 (1.18-1.37) | 1.54 (1.39-1.71) | 1.58 (1.42-1.76)    |
| Antihypertensive          | 0.99 (0.95-1.03) | 0.99 (0.95-1.03) | 1.04 (0.99-1.10) | 1.04 (0.98-1.09) | 1.04 (0.98-1.10) | 1.04 (0.98-1.10) | 1.15 (1.06-1.24) | 1.15 (1.07-1.24)    |
| Antiglycaemics            | 0.93 (0.85-1.02) | 0.92 (0.83-1.01) | 0.90 (0.79-1.04) | 0.90 (0.78-1.03) | 1.04 (0.91-1.20) | 1.03 (0.90-1.19) | 1.18 (0.97-1.44) | 1.19 (0.97-1.45)    |
| Nicotine                  | 1.00 (0.91-1.10) | 1.01 (0.92-1.11) | 1.05 (0.91-1.22) | 1.07 (0.92-1.24) | 1.04 (0.88-1.22) | 1.08 (0.91-1.28) | 0.92 (0.71-1.20) | 0.96 (0.73-1.25)    |
| Stop smoking advice       | 1.08 (1.04-1.12) | 1.12 (1.08-1.16) | 1.19 (1.13-1.26) | 1.23 (1.17-1.30) | 1.28 (1.20-1.35) | 1.32 (1.25-1.40) | 1.65 (1.51-1.79) | 1.74 (1.60-1.90)    |
| Weight advice/referral    | 1.50 (1.45-1.55) | 2.14 (2.07-2.22) | 2.84 (2.73-2.95) | 3.98 (3.81-4.16) | 4.21 (4.04-4.40) | 5.69 (5.42-5.98) | 8.36 (7.89-8.86) | 14.33 (13.31-15.43) |

|   |                          |                  |                  |                  |                  |                  |                  |                  |
|---|--------------------------|------------------|------------------|------------------|------------------|------------------|------------------|------------------|
| 1 | Anti-obesity             | 1.06 (0.88-1.26) | 1.06 (0.88-1.27) | 1.11 (0.85-1.44) | 1.11 (0.85-1.44) | 1.09 (0.83-1.44) | 1.08 (0.82-1.42) | 1.00 (0.68-1.49) |
| 2 | CVD>10% and statin       | 1.12 (1.03-1.21) | 1.35 (1.24-1.48) | 1.27 (1.12-1.43) | 1.49 (1.31-1.70) | 1.78 (1.54-2.07) | 1.90 (1.63-2.21) | 2.90 (2.36-3.57) |
| 3 | CVD>20% and statin       | 1.03 (0.92-1.15) | 1.25 (1.11-1.42) | 1.07 (0.90-1.28) | 1.28 (1.06-1.54) | 1.58 (1.29-1.94) | 1.67 (1.36-2.06) | 2.60 (1.92-3.52) |
| 4 | HTN and antihypertensive | 1.04 (0.98-1.10) | 1.04 (0.98-1.10) | 1.06 (0.97-1.15) | 1.05 (0.96-1.14) | 1.11 (1.02-1.21) | 1.11 (1.02-1.21) | 1.33 (1.18-1.50) |

8 Body mass index (BMI), total cholesterol (TC), cardiovascular disease (CVD), systolic blood pressure (SBP), diastolic blood pressure (DBP), atrial fibrillation (AF), chronic kidney disease (CKD), hypertension (HTN)

13 Table 4 shows demographics of participants in cohort 4 that were eligible at the beginning of their invitation year stratified according to national IMD quintile. There was a disproportionately high number of participants in the least deprived quintile, which reflected the affluence of the study area compared to the national average. The proportion attending a HC was also highest in this quintile. Table 5 shows ORs for outcomes in invited cohort 4, with reference to uninvited cohort 5, stratified according to national IMD quintile. The effects of IMD were significant (at the p=0.05 level) between IMD and detection of: 10 year CVD risk >10%, SBP >140 or DBP > 90 mmHg, BMI >30 kg/m<sup>2</sup>, TC >5.5 mmol/L and TC >7.5 mmol/L as well as weight advice / referral.

25 **Table 4.** Numbers of participants and proportions of males and HC attendees in cohort 4 according to national IMD quintile, wherein quintile 5 is the least deprived.

|                  | Q1   | Q2   | Q3    | Q4    | Q5    |
|------------------|------|------|-------|-------|-------|
| 28 n             | 3775 | 9083 | 10792 | 15098 | 30238 |
| 29 % male        | 50.8 | 49.5 | 47.5  | 46.4  | 45.8  |
| 30 % attended HC | 24.1 | 26.7 | 32.9  | 37.2  | 40.7  |

33 Quintile (Q – 1 = most deprived, 5 = least deprived), n (number of participants), HC (health check)

36 **Table 5** Age and gender adjusted odds ratios with 95% confidence intervals for associations between invitation for an NHS health check and the detection of CVD risk factors, new diagnoses and interventions. Results are shown for invited cohort 4, with reference to uninvited cohort 5, stratified according to IMD quintile, wherein quintile 5 is the least deprived. The outcomes with a significant interaction (p<0.05) with IMD are shown in bold.

| DETECTION                  | Q1                      | Q2                      | Q3                      | Q4                      | Q5                       |
|----------------------------|-------------------------|-------------------------|-------------------------|-------------------------|--------------------------|
| 41 <b>CVD risk &gt;10%</b> | <b>3.02 (2.14-4.28)</b> | <b>6.15 (4.78-7.90)</b> | <b>7.82 (6.21-9.84)</b> | <b>7.99 (6.67-9.58)</b> | <b>9.67 (8.49-11.03)</b> |
| 42 CVD risk >20%           | 3.99 (1.88-8.48)        | 5.30 (3.11-9.01)        | 6.96 (4.05-11.96)       | 7.21 (4.63-11.21)       | 5.56 (4.22-7.33)         |

|                                        |                         |                         |                         |                         |                           |
|----------------------------------------|-------------------------|-------------------------|-------------------------|-------------------------|---------------------------|
| <b>SBP &gt;140 or DBP &gt; 90 mmHg</b> | <b>1.36 (1.13-1.63)</b> | <b>1.45 (1.30-1.63)</b> | <b>1.57 (1.42-1.74)</b> | <b>1.70 (1.56-1.85)</b> | <b>1.71 (1.61-1.82)</b>   |
| Current smoker                         | 1.17 (1.06-1.30)        | 1.16 (1.08-1.25)        | 1.25 (1.16-1.35)        | 1.25 (1.17-1.35)        | 1.25 (1.18-1.33)          |
| <b>BMI &gt;30 kg/m<sup>2</sup></b>     | <b>1.59 (1.36-1.86)</b> | <b>1.96 (1.75-2.20)</b> | <b>2.12 (1.91-2.36)</b> | <b>1.93 (1.75-2.12)</b> | <b>2.24 (2.08-2.41)</b>   |
| <b>TC &gt;5.5 mmol/L</b>               | <b>2.41 (2.02-2.87)</b> | <b>3.01 (2.67-3.39)</b> | <b>3.37 (3.04-3.74)</b> | <b>3.76 (3.43-4.11)</b> | <b>4.30 (4.03-4.59)</b>   |
| <b>TC &gt;7.5 mmol/L</b>               | <b>1.10 (0.63-1.93)</b> | <b>3.47 (2.10-5.75)</b> | <b>2.09 (1.44-3.03)</b> | <b>3.55 (2.44-5.16)</b> | <b>3.39 (2.66-4.34)</b>   |
| DIAGNOSES                              |                         |                         |                         |                         |                           |
| HTN                                    | 1.65 (1.04-2.62)        | 1.22 (0.92-1.61)        | 1.43 (1.12-1.82)        | 1.23 (0.99-1.54)        | 1.34 (1.14-1.57)          |
| AF                                     | 1.77 (0.29-10.65)       | 0.56 (0.19-1.64)        | 1.08 (0.50-2.30)        | 0.98 (0.50-1.92)        | 1.08 (0.65-1.79)          |
| CKD                                    | NA*                     | 3.36 (0.35-32.44)       | 0.67 (0.20-2.31)        | 0.48 (0.12-1.86)        | 0.37 (0.10-1.36)          |
| Diabetes                               | 1.32 (0.72-2.45)        | 1.29 (0.83-2.01)        | 1.02 (0.67-1.55)        | 1.15 (0.74-1.78)        | 1.74 (1.27-2.37)          |
| INTERVENTIONS                          |                         |                         |                         |                         |                           |
| Statin                                 | 1.46 (1.00-2.12)        | 1.39 (1.06-1.82)        | 1.37 (1.06-1.77)        | 1.50 (1.19-1.89)        | 1.76 (1.48-2.09)          |
| Anti-hypertensive                      | 1.20 (0.90-1.60)        | 1.17 (0.95-1.43)        | 1.19 (0.99-1.43)        | 1.14 (0.96-1.35)        | 1.13 (1.00-1.27)          |
| Antiglycaemics                         | 1.15 (0.60-2.22)        | 1.05 (0.65-1.69)        | 1.04 (0.66-1.63)        | 1.04 (0.63-1.70)        | 1.44 (1.03-2.00)          |
| Nicotine replace                       | 1.54 (0.75-3.17)        | 0.54 (0.28-1.03)        | 1.14 (0.63-2.08)        | 0.63 (0.36-1.09)        | 1.31 (0.75-2.28)          |
| Stop smoking advice                    | 1.84 (1.33-2.54)        | 1.46 (1.18-1.81)        | 1.48 (1.23-1.79)        | 1.62 (1.34-1.95)        | 1.82 (1.58-2.10)          |
| <b>Weight advice/referral</b>          | <b>4.48 (3.60-5.59)</b> | <b>6.42 (5.47-7.53)</b> | <b>7.68 (6.63-8.89)</b> | <b>8.17 (7.21-9.25)</b> | <b>10.21 (9.32-11.18)</b> |
| Anti-obesity                           | 0.82 (0.29-2.32)        | 0.56 (0.21-1.48)        | 0.95 (0.44-2.05)        | 1.09 (0.45-2.62)        | 2.16 (0.87-5.36)          |
| CVD risk >10% and statin               | 1.14 (0.48-2.70)        | 3.32 (1.94-5.66)        | 2.53 (1.52-4.20)        | 3.00 (1.90-4.71)        | 3.24 (2.34-4.49)          |
| CVD risk >20% and statin               | 1.49 (0.45-4.96)        | 3.12 (1.52-6.41)        | 2.20 (1.00-4.85)        | 3.25 (1.55-6.81)        | 2.57 (1.63-4.05)          |
| HTN and anti-hypertensive              | 1.35 (0.77-2.35)        | 1.35 (0.97-1.87)        | 1.21 (0.91-1.60)        | 1.26 (0.96-1.65)        | 1.41 (1.17-1.70)          |

\*Insufficient data, Quintile (Q – 1 = most deprived, 5 = least deprived), body mass index (BMI), total cholesterol (TC), cardiovascular disease (CVD), systolic blood pressure (SBP), diastolic blood pressure (DBP), atrial fibrillation (AF), chronic kidney disease (CKD), hypertension (HTN)

## **DISCUSSION**

1  
2  
3 This study evaluated the NHS HC programme in Hampshire from its implementation in April 2011 until March 2015. HC  
4 attendance following invitation increased year on year and as of 2015 was 30%. Attendees were older, from less  
5 deprived backgrounds and less likely to be male than those who were invited but chose not to attend. A significant  
6 finding was the large increase of up to 17.5% in the proportion of patients with measurements of TC among HC invited  
7 cohorts compared to non-invited. As might be expected, this led to large increases in detection of elevated TC >5.5  
8 mmol/L and CVD risk >10%, as well as TC >7.5 mmol/L and CVD risk >20%. Notwithstanding, there were only modest  
9 increases in detection plus treatment with statins. Explanations for this might include guidance during the study period  
10 recommending statins for CVD risk >20%, whereas the largest increased was in detection of CVD risk > 10%.  
11 Nonetheless, even among those with CVD risk >20% only 36.5%-40.7% (range for the invited cohorts) of participants  
12 were prescribed statins. This is substantially lower than the 85% used in modelling studies by the Department of  
13 Health.[5] In the uninvited group, rates of statin prescriptions following identification of CVD risk >20% were slightly  
14 higher (41.9%), but still lower than expected. Accordingly, there may be a more general issue relating to the step up  
15 from risk factor identification to diagnosis, and from diagnosis to treatment across general practice that would represent  
16 a missed opportunity at a population level for primary prevention of CVD. More specifically to the HC, there is a lack of  
17 a defined follow-up pathway following identification of increased 10-year CVD risk. Public Health England commissions  
18 and pays for the HC itself but follow-up is then a cost to General Practices which maybe a barrier.

19  
20  
21  
22  
23  
24  
25  
26  
27  
28  
29  
30  
31  
32  
33  
34  
35  
36  
37  
38  
39  
40  
41  
42  
43  
44  
45  
46  
47  
48  
49  
50  
51  
52  
53  
54  
55  
56  
57  
58  
59  
60  
Statin prescription rates may have increased since the study period, as updated National Institute for Health and Care  
Excellence (NICE) guidance now recommends statins for CVD risk >10% and a recent large and well-publicised review  
reported a more favourable risk / benefit profile of statins than thought previously.[21] Statin prescription rates resulting  
from a HC may also be higher outside of Hampshire, as they are known to vary locally.[22]

Other notable findings of this study included increased detection of elevated BP among HC invited cohorts, as well as  
modest increases in new diagnoses of hypertension and treatment. Those attending HCs were more likely to be  
diagnosed with diabetes, but the corresponding increase in prescriptions of antiglycaemics did not reach significance.  
According to HC guidance, diabetes screening is performed only in those deemed "at risk" with BMI  $\geq 30$  kg/m<sup>2</sup> ( $\geq 25$   
kg/m<sup>2</sup> in non-white ethnic groups) or SBP or DBP above  $\geq 140$  mmHg or 90 mmHg. Data regarding the sensitivity of  
these criteria are limited, but one study in the United States reported that a BMI cut off of  $\geq 25$  kg/m<sup>2</sup> "would miss 36%  
of Asian Americans with newly diagnosed type 2 diabetes",[23] so the HC may also have missed cases.

There was no significant increase in new diagnoses of CKD. This was likely because kidney function tests were  
performed only in HC patients with SBP or DBP  $\geq 140$  mmHg or 90 mmHg. A formal diagnoses of CKD would have  
required a repeat blood test, something which would need to have been organised by the GP and agreed to by the  
patient.

1 The HC did not result in any significant increase in new diagnoses of AF. NICE Hypertension clinical guideline 127  
2 states that practitioners should manually palpate the pulse before measuring blood pressure.[24] However, this may not  
3 have been performed consistently or reliably during the HC. Manual palpation is not necessary with electronic  
4 sphygmomanometers, and any patient with an irregular pulse would have further required an electrocardiogram (ECG)  
5 to diagnose AF.  
6  
7

8  
9  
10 There were increases in detection of smokers and BMI >30 kg/m<sup>2</sup>, as well as corresponding increases in lifestyle advice  
11 / referrals, particularly for high BMI. However, there was no significant difference in NRT or anti-obesity medications.  
12  
13

14 The HC had lower positive predictive values (or yield) for detection of risk factors than checks performed  
15 opportunistically. Most notably, lower proportions of CVD risk scores measured during the HC were >10% (-11.5% -  
16 -2.8%) and >20% (-6.1% - -1.8%). This may have been because GPs targeted opportunistic checks at those who were  
17 already symptomatic or because HC attendees were healthier with a lower prevalence of risk factors. A recent cohort  
18 study of 18 general practices in South London also found that participants taking up an opportunistic HC were at higher  
19 CVD risk (17% of invited HC and 22% of opportunistic HC with CVD risk score ≥10%), and that in younger adults in  
20 more deprived areas the opportunistic HC constituted a higher proportion of all HC performed. It was concluded that  
21 GPs were successfully targeting groups at higher risk who may otherwise face barriers to attendance at a pre-arranged  
22 HC.[25]  
23  
24  
25  
26  
27  
28  
29  
30  
31

32 In the final year of this study, uptake of the HC was highest among participants in the least deprived national IMD quintile  
33 (40.7%) and lowest in the most deprived (24.1%). There was evidence of better performance of the HC among less  
34 deprived participants for detection of 10-year CVD risk >10%, SBP >140 mmHg or DBP > 90 mmHg, BMI, TC >5.5  
35 mmol/L and TC >7.5 mmol/L and weight advice / referral. However, the precise effect of deprivation was difficult to  
36 estimate given the competing effects of differences in HC uptake (lowest in the most deprived quintile), the frequency  
37 of risk variable (highest in the most deprived quintile) and differing sample sizes (i.e. power to test / reject the null  
38 hypothesis). Primary care management may also have played a role, but the lack of difference by deprivation in  
39 prescribing rates in those detected suggests this was not a key factor.  
40  
41  
42  
43  
44  
45  
46  
47

48 Our findings build on existing evidence that attendees tend to be older, female and non-smokers.[16,26] The observation  
49 in this study that HC attendees were from less deprived socioeconomic groups is reflected by some studies[27] though  
50 not others.[16,26]. Reasons for an inconsistent effect on deprivation are unclear, but may relate to targeting of at risk  
51 groups, which has been shown to improve uptake and is likely to vary locally.[22]  
52  
53  
54  
55

56 Earlier studies report associations between HC attendance and increased recording and detection of CVD risk factors  
57 and use of interventions[17]. It has also been shown that a year after completing a HC, attendees have modest but  
58 significant reductions in CVD risk scores, diastolic blood pressure, TC levels and lipid ratios.[18] However, Chang et al.  
59 [26] found that only a third of HC attendees with CVD risk scores > 20% go on to be prescribed statins, slightly lower  
60



1 than that observed in the present study (36.5%–40.7%). Reasons for low prescription rates among high-risk groups are  
2 unclear, but patient refusal might be important and requires further research. Similar to this study, Smith et al.[28]  
3 reported a limited effect of HC attendance on detection rates and treatment of diabetes which, as is explained above, is  
4 likely because measuring blood glucose or HBA1c is not a standard part of the HC.  
5  
6  
7

8 The increases in proportions of new prescriptions we observed were smaller than those found in two large previous  
9 matched studies.[17,26] This is to be expected given that those studies compared attendees vs. non-attendees, whereas  
10 we considered invitees vs. non-invitees. Given that not everybody invited for a HC will attend, our approach is more  
11 likely to be representative of the effect of the HC programme overall.  
12  
13  
14

15 Strengths of this study included the biggest sample size to date for a HC study comprising 277,274 patients invited for  
16 a HC and 88,731 patients who were not. It is the first HC study to employ a quasi-randomised method and an intention-  
17 to-treat analysis. Specifically, patients were allocated to either HC invited or non-invited groups according to their dates  
18 of birth. We were able to evaluate the HC programme at the level of invitation, which is advantageous compared to  
19 previous studies which compared attendance vs. non-attendance. There were also weaknesses in our methods. First,  
20 our follow-up periods were short, varying from an average of six months (cohort 4) to 3.5 years (cohort 1). Process  
21 outcomes may have occurred after the end of follow-up, particularly in the case of new treatments that may have required  
22 further appointments and monitoring (e.g. for new prescriptions of antihypertensive). In addition, we were unable to  
23 observe clinically important outcomes, such as incident cardiovascular disease. For every 100 people invited for a HC  
24 in 2012/13, an extra one person was prescribed a statin. Based on a literature reported number needed to treat (NNT)  
25 for primary prevention of cardiovascular events,[29] one event may be prevented for every 560 people invited for a HC,  
26 but this estimation does not account for duration of treatment or adherence. Improving NNTs would require greater  
27 uptake of the HC and / or greater prescribing among those with identified CVD risk. A second limitation of our study was  
28 that we were missing all data including at baseline for an unknown number of patients who died during the follow-up,  
29 which was a consequence of how our data source, the HHRA, was organised. These deaths will selectively have  
30 reduced numbers of those at highest risk from our population. They will tend to have been in poorer and higher risk  
31 groups and, therefore, less likely to attend a HC. The numbers would have been balanced between the cohorts, so  
32 should not have affected our between-cohort comparisons. However, they might have reduced the overall risk profile,  
33 and differentially within cohorts favour attendance. A third limitation was contamination bias, as some patients in the  
34 uninvited group attended a HC. Contamination was largely inevitable given advertising and public awareness of the HC  
35 and given that all included GP practices were involved in delivering the programme. Contamination likely led to an  
36 underestimation of the effectiveness of the HC programme in our study. Fourth, we had limited details on some factors,  
37 including diet and alcohol intake, and non-medical interventions, such as lifestyle advice. Lifestyle advice may have  
38 ranged from brief general advice to individually tailored advice with subsequent follow-up. However, such variation likely  
39 had a small effect on our results given an earlier study that reported a lack of an association between the intensity of  
40  
41  
42  
43  
44  
45  
46  
47  
48  
49  
50  
51  
52  
53  
54  
55  
56  
57  
58  
59  
60

lifestyle advice as part of a HC and related CVD risk reduction.[30] Fifth, there were potential coding errors or omissions by GPs in recording attendance, measurements, diagnoses and interventions. This may have been particularly problematic for cohort 1 because Read Codes for HC completion were only released in 2012, after the start of the invitation year. Failure of GPs to code attendance retrospectively (i.e. once the Read Codes were available) may, in part, explain why there was lower recorded HC attendance in cohort 1 compared to the other cohorts. Otherwise, coding errors would have affected the intervention and non-intervention groups equally. Sixth, we missed data on HC undertaken in community pharmacies and other non-GP settings though this was a small minority. Our population was not necessarily representative of the UK, and we had no data on ethnicity. Hampshire does comprise significant urban, suburban and rural populations, but the proportion of ethnic minorities is lower than the national average and this may limit the generalisability of our results. Seventh, we excluded around 35% of the eligible population. This was because of problems with the invitation system, missing DOBs, Read Codes not formatted according to Version 2 and unknown invitation status for some participants (e.g. because of moving into the study area after the start of the follow-up period). However, these exclusions would have been equal across the cohorts. Finally, our study period ended in 2015, and clinical guidance as well as engagement by GPs and patients with the HC programme may have changed since then.

In conclusion, this study evaluated the NHS HC programme and showed that participation increased year on year between 2011 and 2015. The HC programme resulted in large increases in the detection of patients with CVD risk factors, particularly raised cholesterol and 10-year CVD risk scores >10%. There were corresponding, albeit smaller, increases in certain evidence based medical therapies, most notably statins. However, rates of uptake, diagnosis and treatment were well below those expected by the Department of Health.[5] Future work should focus on improving uptake, including through use of non-GP settings (e.g. pharmacy etc.)[31] and by better communication of the programme[32,33] and invitation methods driven by behavioural insights.[34] Further support is also required in decision making for patients and GPs following identification of new risk factors as part of the NHS HC, potentially including incentivisation (e.g. payment by results). Finally, further studies are needed to assess the longer-term effects of the HC on clinical outcomes and health inequalities.

### **Acknowledgements**

The authors thank NHS South, Central and West Commissioning Support Unit and the Care and Health Information Exchange Information Governance Group for their support, and for provision of access to CHIA (formerly known as HHRA) data.

### **Figures**

**Figure 1.** Derivation of the study population and five cohorts included in this study. Cohorts 1-4 were invited for HCs in the years beginning 1<sup>st</sup> April 2011, 12, 13 and 14 respectively, while cohort 5, which was the control group, was not invited.



**Figure 2.** Histograms showing the distribution of ages within the five cohorts.**References**

1. GBD 2017 Disease and Injury Incidence and Prevalence Collaborators. Global, regional, and national incidence, prevalence, and years lived with disability for 354 diseases and injuries for 195 countries and territories, 1990-2017: a systematic analysis for. *Lancet* (London, England). 2018 Nov;392(10159):1789–858.
2. Bhatnagar P, Wickramasinghe K, Williams J, et al. The epidemiology of cardiovascular disease in the UK 2014. *Heart*. 2015 Aug;101(15):1182–9.
3. Smith ER. The Canadian heart health strategy and action plan. Vol. 25, *The Canadian journal of cardiology*. England; 2009. p. 451–2.
4. Frieden TR, Berwick DM. The “Million Hearts” initiative--preventing heart attacks and strokes. *N Engl J Med*. 2011 Sep;365(13):e27.
5. Department of Health. Economic Modelling for Vascular Checks. London. Department of Health, 2008.
6. Mytton OT, Jackson C, Steinacher A, et al. The current and potential health benefits of the National Health Service Health Check cardiovascular disease prevention programme in England: A microsimulation study. *PLoS Med*. 2018 Mar;15(3):e1002517.
7. NHS Health Check Best practice guidance. Public Health England. March 2016. Available from: <http://www.healthcheck.nhs.uk/> (accessed 2/12/17).
8. Krogsboll LT, Jorgensen KJ, Gotzsche PC. Universal health checks should be abandoned. Vol. 347, *BMJ* (Clinical research ed.). England; 2013. p. f5227.
9. Capewell S, McCartney M, Holland W. NHS Health Checks--a naked emperor? *J Public Health (Oxf)*. 2015 Jun;37(2):187–92.
10. Krogsboll LT, Jorgensen KJ, Gronhoj Larsen C, et al. General health checks in adults for reducing morbidity and mortality from disease. *Cochrane database Syst Rev*. 2012 Oct;10:CD009009.
11. Dalton ARH, Bottle A, Okoro C, et al. Uptake of the NHS Health Checks programme in a deprived, culturally diverse setting: cross-sectional study. *J Public Health (Oxf)*. 2011 Sep;33(3):422–9.
12. Nicholas JM, Burgess C, Dodhia H, et al. Variations in the organization and delivery of the “NHS health check” in primary care. *J Public Health (Oxf)*. 2013 Mar;35(1):85–91.
13. Jenkinson CE, Asprey A, Clark CE, et al. Patients’ willingness to attend the NHS cardiovascular health checks in primary care: a qualitative interview study. *BMC Fam Pract*. 2015 Mar;16:33.
14. Waterall J, Greaves F, Gresser C, et al. Response to Capewell et al. *J Public Health (Oxf)*. 2015 Jun;37(2):193–4.
15. Martin A, Saunders CL, Harte E, et al. Delivery and impact of the NHS Health Check in the first 8 years: a systematic review. *Br J Gen Pract*. 2018 Jul;68(672):e449–59.
16. Robson J, Dostal I, Sheikh A, et al. The NHS Health Check in England: an evaluation of the first 4 years. *BMJ Open*. 2016 Jan;6(1):e008840.
17. Forster AS, Burgess C, Dodhia H, et al. Do health checks improve risk factor detection in primary care? Matched cohort study using electronic health records. *J Public Health (Oxf)*. 2016 Sep;38(3):552–9.
18. Artac M, Dalton ARH, Majeed A, et al. Effectiveness of a national cardiovascular disease risk assessment program (NHS Health Check): results after one year. *Prev Med (Baltim)*. 2013 Aug;57(2):129–34.
19. Lefebvre C, Manheimer E, Glanville J. Box 6.3.a: Cochrane definitions and criteria for randomized controlled trials (RCTs) and controlled clinical trials (CCTs). In: Higgins JPT, Green S (editors). *Cochrane Handbook for Systematic Reviews of Interventions*.
20. R Development Core Team (2008). *R: A language and environment for statistical computing*. R Foundation for Statistical Computing, Vienna, Austria. ISBN 3-900051-07-0, URL <http://www.R-project.org>.
21. Collins R, Reith C, Emberson J, et al. Interpretation of the evidence for the efficacy and safety of statin therapy. *Lancet* (London, England). 2016 Nov;388(10059):2532–61.
22. Robson J, Dostal I, Madurasinghe V, et al. The NHS Health Check programme: implementation in east London 2009-2011. *BMJ Open*. 2015 Apr;5(4):e007578.
23. Araneta MR, Kanaya A, Fujimoto W, et al. Optimum BMI cut-points to screen Asian Americans for type 2 diabetes. Poster presentation at American Diabetes Association 74th Scientific Sessions, 13–17 June 2014, San Francisco, CA.

24. NICE guidelines [CG127]. Available at: <https://www.nice.org.uk/guidance/cg127> (Accessed: 16 March 2018).
25. Gulliford MC, Khoshaba B, McDermott L, et al. Cardiovascular risk at health checks performed opportunistically or following an invitation letter. Cohort study. *J Public Health (Oxf)*. 2018 Jun;40(2):e151–6.
26. Chang KC-M, Soljak M, Lee JT, et al. Coverage of a national cardiovascular risk assessment and management programme (NHS Health Check): Retrospective database study. *Prev Med (Baltim)*. 2015 Sep;78:1–8.
27. Cochrane T, Gidlow CJ, Kumar J, et al. Cross-sectional review of the response and treatment uptake from the NHS Health Checks programme in Stoke on Trent. *J Public Health (Oxf)*. 2013 Mar;35(1):92–8.
28. Smith S, Waterall J, Burden ACF. An evaluation of the performance of the NHS Health Check programme in identifying people at high risk of developing type 2 diabetes. *BMJ Open*. 2013 Mar;3(3).
29. Taylor F, Huffman MD, Macedo AF, et al. Statins for the primary prevention of cardiovascular disease. In: Huffman MD, editor. *Cochrane Database of Systematic Reviews [Internet]*. Chichester, UK: John Wiley & Sons, Ltd; 2013 [cited 2017 Dec 3]. Available from: <http://doi.wiley.com/10.1002/14651858.CD004816.pub5>
30. Cochrane T, Davey R, Iqbal Z, et al. NHS health checks through general practice: randomised trial of population cardiovascular risk reduction. *BMC Public Health [Internet]*. 2012;12(1):944. Available from: <http://bmcpublichealth.biomedcentral.com/articles/10.1186/1471-2458-12-944>
31. Woringer M, Cecil E, Watt H, et al. Evaluation of community provision of a preventive cardiovascular programme - the National Health Service Health Check in reaching the under-served groups by primary care in England: cross sectional observational study. *BMC Health Serv Res*. 2017 Jun;17(1):405.
32. Usher-Smith JA, Harte E, MacLure C, et al. Patient experience of NHS health checks: a systematic review and qualitative synthesis. *BMJ Open*. 2017 Aug;7(8):e017169.
33. Riley R, Coghill N, Montgomery A, et al. Experiences of patients and healthcare professionals of NHS cardiovascular health checks: a qualitative study. *J Public Health (Oxf)*. 2016 Sep;38(3):543–51.
34. Sallis A, Bunten A, Bonus A, et al. The effectiveness of an enhanced invitation letter on uptake of National Health Service Health Checks in primary care: a pragmatic quasi-randomised controlled trial. *BMC Fam Pract [Internet]*. 2016;17(1):35. Available from: <https://doi.org/10.1186/s12875-016-0426-y>

### Declaration of competing interests

All authors have completed the ICMJE uniform disclosure form at [www.icmje.org/coi\\_disclosure.pdf](http://www.icmje.org/coi_disclosure.pdf) and declare: no support from any organisation for the submitted work; no financial relationships with any organisations that might have an interest in the submitted work in the previous three years; no other relationships or activities that could appear to have influenced the submitted work.

### Ethics approval

This study received ethical approval from the Research Ethics Committee at the University of Southampton ID: 24358) and approval from the Hampshire Health Record Information Governance Group.

### Contributorship

The corresponding author attests that all listed authors meet authorship criteria and that no others meeting the criteria have been omitted. OJK, FS, EW, RP and PR conceived and designed the study; FS performed the data acquisition from the Hampshire Health Record Database and OJK performed the data analysis; OJK and FS drafted the manuscript which was reviewed and amended by all authors. All authors, external and internal, had full access to all of the data (including statistical reports and tables) in the study and can take responsibility for the integrity of the data and the accuracy of the data analysis. PR is guarantor.

### Copyright

1 The Corresponding Author has the right to grant on behalf of all authors and does grant on behalf of all authors, a  
2 worldwide licence to the Publishers and its licensees in perpetuity, in all forms, formats and media (whether known now  
3 or created in the future), to i) publish, reproduce, distribute, display and store the Contribution, ii) translate the  
4 Contribution into other languages, create adaptations, reprints, include within collections and create summaries, extracts  
5 and/or, abstracts of the Contribution, iii) create any other derivative work(s) based on the Contribution, iv) to exploit all  
6 subsidiary rights in the Contribution, v) the inclusion of electronic links from the Contribution to third party material where-  
7 ever it may be located; and, vi) licence any third party to do any or all of the above.  
8  
9  
10  
11  
12

### 13 **Funding**

14 This research received no specific grant from any funding agency in the public, commercial or not-for-profit sectors.  
15  
16  
17

### 18 **Transparency declaration**

19 PR affirms that the manuscript is an honest, accurate, and transparent account of the study being reported; that no  
20 important aspects of the study have been omitted; and that any discrepancies from the study as planned (and, if relevant,  
21 registered) have been explained.  
22  
23  
24  
25  
26  
27

### 28 **Data sharing**

29 Access to the data used in this study is administrated by the Care and Health Information Exchange (CHIE)  
30 Information Governance Group, which is managed by the South, Central and West Commissioning Support Unit on  
31 behalf of health and social care organisations in Hampshire, Farnham and the Isle of Wight.  
32  
33  
34  
35  
36  
37  
38  
39  
40  
41  
42  
43  
44  
45  
46  
47  
48  
49  
50  
51  
52  
53  
54  
55  
56  
57  
58  
59  
60

1  
2  
3  
4  
5  
6  
7  
8  
9  
10  
11  
12  
13  
14  
15  
16  
17  
18  
19  
20  
21  
22  
23  
24  
25  
26  
27  
28  
29  
30  
31  
32  
33  
34  
35  
36  
37  
38  
39  
40  
41  
42  
43  
44  
45  
46  
47  
48  
49  
50  
51  
52  
53  
54  
55  
56  
57  
58  
59  
60

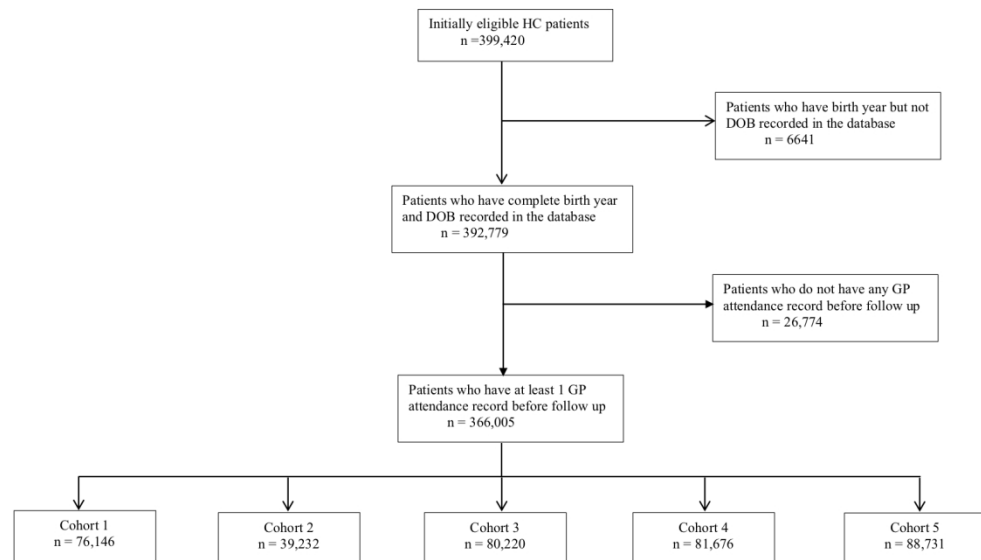

Figure 1. Derivation of the study population and five cohorts included in this study. Cohorts 1-4 were invited for HCs in the years beginning 1st April 2011, 12, 13 and 14 respectively, while cohort 5, which was the control group, was not invited.

146x83mm (300 x 300 DPI)

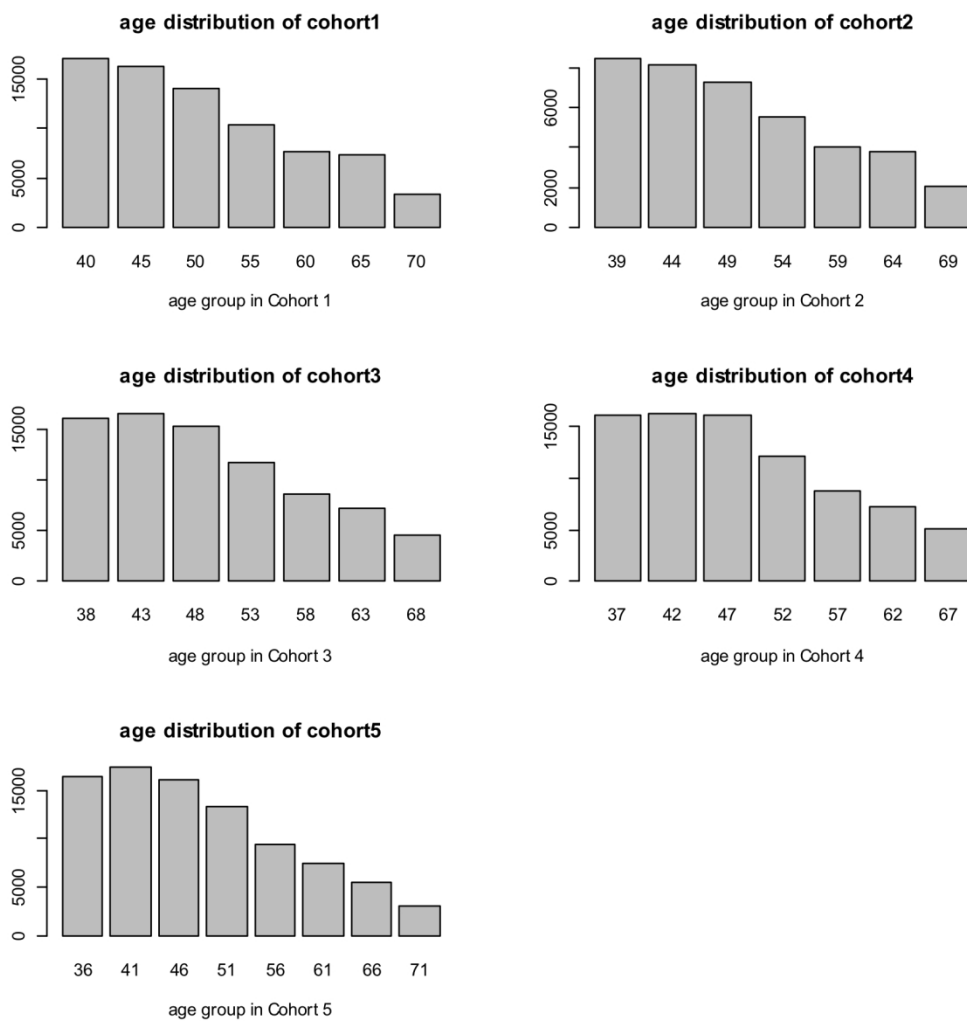

Figure 2. Histograms showing the distribution of ages within the five cohorts.

150x158mm (300 x 300 DPI)

# **Evaluating the Effectiveness of the NHS Health Check Programme in South England: a Quasi-Randomised Controlled Trial – supplementary materials**

O. J. Kennedy<sup>1</sup> \* (0000-0001-7907-9118), F. Su<sup>2</sup>, R. Pears<sup>3</sup>, E Walmsley<sup>1</sup>, P. Roderick<sup>1</sup>

1. Primary Care & Population Sciences Faculty of Medicine, University of Southampton, Southampton, UK

O. J. Kennedy, Visiting Research Fellow

E Walmsley, Public Health Registrar

P. Roderick, Professor of Public Health

2. NHS South, Central and West Commissioning Support Unit, Eastleigh, Hampshire, UK

F. Su, Principal Information Analyst

3. Public Health Directorate, Hampshire County Council, Hampshire, UK

R. Pears, Public Health Consultant

Read codes (5-byte version 2 Read codes, EMIS or BNF)

## NHS Health Check codes

8BAg NHS Health Check completed

EMISNQN6 NHS Health check completed

EMISNQN7 NHS Health check completed by practice

8BAg0 NHS Health Check completed by third party

## Blood pressure

Systolic blood pressure: ReadCode like '2469%' or ReadCode like '246Q%'

Diastolic blood pressure: ReadCode like '246A%' or ReadCode like '246R%'

246.. | O/E - blood pressure reading

246R. | Sitting diastolic blood pressure

246Q. | Sitting systolic blood pressure

## Body mass index

'22K2.', '22K1.', '22K4.', '22K5.', '22K6.', '22K7.', '22K8.', '22K9.', '22K90', '22KB.', '22K..', '22K3.'

## Total cholesterol

'44OE.' Plasma total cholesterol level

'44P..' Serum cholesterol

'44P1.' Serum cholesterol normal

'44P2.' Serum cholesterol borderline

'44P3.' Serum cholesterol raised

'44P4.' Serum cholesterol very high

'44PH.' Total cholesterol measurement

'44PJ.' Serum total cholesterol level

## 10-year risk of CVD disease

'662k%' (JBS CVD risk less than 10% over next ten years)

'662l%' (JBS CVD risk ten percent to 20% over next ten years)

'662m%' (JBS CVD risk greater than 20% up to 30% over next ten years)

'662n%' (JBS CVD risk greater than 30% over next ten years)  
 '38DP%' (QRISK2 cardiovascular disease 10 year risk score)  
 '38DF%' (QRISK cardiovascular disease 10 year risk score)  
 '38DR%' (Framingham 1991 cardiovascular disease 10 year risk score)

#### Current smoker

'137..','1372.','1373.','1374.','1375.','1376.','137b.','137c.','137C.','137D.','137d.','137e.','137E.','137f.','137G.','137h.','137H.','137J.','137m.','137a.','137X.','137Y.','137Z.','137M.','137n.','137P.','137Q.','137R.','137V.','13p0.','13p5.','67H6.','745H.','8CAg.','8CAL.','8CdB.','8H7i.','8HBM.','8HBP.','8HkQ.','8HTK.','8I Aj.','8IEK.','8IEM.','8IEo.','8T08.','9hG.','9hG0.','9hG1.','9kc.','9kc0.','9kf1.','9kf2.','9ko.','9N2k.','9N4M.','9Ndg.','9NdZ.','9OO.','9OO1.','9OO2.','9OO3.','9OO4.','9OO5.','9OO6.','9OO7.','9OO8.','9OO9.','9OO A.','9OOB.','9OOZ.','13p50%','745H0%','745H,%','745H2%','745H3%','745H4%','745Hy%','745Hz%','9 NS02%','9OOB0%','9OOB1%','9OOB2%'

#### Ex smoker

'137K.','137N.','137O.','137S.','137T.','13p4.','1377.','137l.','9km.','137j.','1378.','137F.','137B.','1379.','137A.','137L.','137i.','137K0%'

#### Non-smoker

'137L.'

#### Never smoking

'1371.'

#### Hypertension

QOFv28 - Hypertension  
 G2...  
 G20..%  
 G24.. - G2z.. (Excluding G24z1, G2400, G2410, G27..)  
 Gyu2.  
 Gyu20

#### Ischaemic heart disease

QOF v28 - Secondary Prevention of Coronary Heart Disease  
 G3... - G309.  
 G30B. - G330z (excluding G310.)  
 G33z. - G3401  
 G342. - G35X.  
 G38.. - G3z..  
 Gyu3.% (excluding Gyu31)

#### Diabetes

QOF v28 - Diabetes  
 C10.., C109J, C109K, C10C.,C10D., C10E.%, C10F.% (Excluding C10F8), C10G.%, C10H.%, C10M.%, C10N.%,PKyP.,C10P.%

#### CKD

QOF v28 - CKD  
 1Z12.  
 1Z13.  
 1Z14.  
 1Z15.  
 1Z16.  
 1Z1B. - 1Z1L.  
 K053.  
 K054.  
 K055.

#### AF

QOF v28 - AF

1  
2  
3 G573.% (excluding G5731, G5736)  
4

5 Heart Failure

6 QOF v28 – HF

7 G58..%

8 G1yz1

9 662f. – 662i.

10 Atherosclerosis and other peripheral vascular disease

11 G70% Atherosclerosis

12 G73 Other peripheral vascular disease

13 G7310 Buerger's disease

14 G7311 Presenile gangrene

15 G731z Thromboangiitis obliterans NOS

16 G732% Peripheral gangrene

17 G733 Ischaemic foot

18 G73y Other specified peripheral vascular disease

19 G73y0 Diabetic peripheral angiopathy

20 G73yz Other specified peripheral vascular disease NOS

21 G73z Peripheral vascular disease NOS

22 G73z0 Intermittent claudication

23 G73zz Peripheral vascular disease NOS  
24

25 Stroke and TIA

26 QOF v28 – Stroke and TIA

27 G61..% (excluding G617.)

28 G63y0 - G63y1

29 G64..%

30 G66..% (excluding G669.)

31 G6760

32 G6W..

33 G6X..

34 G65.- G654.

35 G656.- G65zz

36 Gyu62 – Gyu66

37 Gyu6F

38 Gyu6G

39 ZV12D

40 Fyu55

41 G619.  
42

43 Additional circulatory system disease.

44 Gyu% Additional circulatory system disease classification terms

45 NOT Gyu0% Acute rheumatic fever

46 NOT Gyu1% Chronic rheumatic heart disease

47 NOT Gyu2% Hypertensive diseases

48 NOT Gyu8% Diseases of veins, lymphatic vessels and lymph nodes, not elsewhere classified

49 NOT Gyu9% Other and unspecified disorders of the circulatory system  
50

51 STATINS

52 bx% LIPID-LOWERING DRUGS

53 2.12 Lipid-regulating drugs (BNF)  
54

55 Antihypertensive

56 BNF\_Code 02.02.01.00, 02.02.02.00, 02.02.03.00, 02.04.00.00, 02.04.01.00, 02.05.04.00,

57 02.05.05.00, 02.05.05.01, 02.05.05.02, 02.06.02.00, TitleofGroup in ('Angiotensin-Converting Enzyme

58 Inhibitors','Calcium Channel Blockers','Angiotensin-II Receptor Antagonists','Potassium Sparing

59 Diuretics','Thiazides And Related Diuretics','Loop Diuretics','Alpha-Adrenoceptor Blocking  
60



Drugs', 'Beta-Adrenoceptor Blocking Drugs', 'Compound Beta-Adrenoceptor Blocking Drugs', 'Drugs Affecting The Renin-Angiotensin System')

Anti-obesity

aw...

Anti-diabetes

BNF code 06.01.00.00, and titleofGroup is : Drugs Used In Diabetes

Nicotine replacement

BNF\_Code 04.10.00.00, 04.10.02.00

K: Palliative care

|       |                                                               |
|-------|---------------------------------------------------------------|
| 1Z01  | Terminal illness - late stage                                 |
| 2JE   | Last days of life                                             |
| 8BA2  | Terminal care                                                 |
| 8BAP  | Specialist palliative care                                    |
| 8BAS  | Specialist palliative care treatment - daycare                |
| 8BAT  | Specialist palliative care treatment - outpatient             |
| 8BAe  | Anticipatory palliative care                                  |
| 8BJ1  | Palliative treatment                                          |
| 8CM1% | On gold standards palliative care framework                   |
| 8CM4  | Liverpool care pathway for the dying                          |
| 8CME  | Has end of life advanced care plan                            |
| 8H6A  | Refer to terminal care consult                                |
| 8H7L  | Refer for terminal care                                       |
| 8H7g  | Referral to palliative care service                           |
| 8HH7  | Referred to community specialist palliative care team         |
| 9EB5  | DS 1500 Disability living allowance (terminal care) completed |
| 9Ng7  | On end of life care register                                  |
| ZV57C | Palliative care                                               |

Previous health checks and CVD risk assessments

|       |                                                             |
|-------|-------------------------------------------------------------|
| 38B1  | Vascular disease risk assessment                            |
| 38B10 | CVD (cardiovascular disease) risk assessment by third party |
| 66f   | Cardiovascular disease monitoring                           |
| 66f0  | Cardiovascular disease annual review                        |
| 66f1  | Cardiovascular disease interim monitoring                   |
| 66f2  | Cardiovascular disease high risk review                     |
| 8BAg  | NHS Health Check completed                                  |
| 9OhA  | Cardiovascular disease risk assessment done                 |
| 8BAg0 | NHS Health Check completed by third party                   |

# BMJ Open

## Evaluating the Effectiveness of the NHS Health Check Programme in South England: a Quasi-Randomised Controlled Trial

|                                 |                                                                                                                                                                                                                                                                                                                                                 |
|---------------------------------|-------------------------------------------------------------------------------------------------------------------------------------------------------------------------------------------------------------------------------------------------------------------------------------------------------------------------------------------------|
| Journal:                        | <i>BMJ Open</i>                                                                                                                                                                                                                                                                                                                                 |
| Manuscript ID                   | bmjopen-2019-029420.R2                                                                                                                                                                                                                                                                                                                          |
| Article Type:                   | Research                                                                                                                                                                                                                                                                                                                                        |
| Date Submitted by the Author:   | 12-Aug-2019                                                                                                                                                                                                                                                                                                                                     |
| Complete List of Authors:       | Kennedy, Oliver; University of Southampton Faculty of Medicine, Su, Fangzhong; NHS South, Central and West Commissioning Support Unit<br>Pears, Robert; Public Health Directorate, Hampshire County Council<br>Walmsley, Emily; University of Southampton Faculty of Medicine<br>Roderick, Paul; University of Southampton, Faculty of Medicine |
| <b>Primary Subject Heading</b>: | Cardiovascular medicine                                                                                                                                                                                                                                                                                                                         |
| Secondary Subject Heading:      | General practice / Family practice                                                                                                                                                                                                                                                                                                              |
| Keywords:                       | health checks, cardiovascular risk management, cardiovascular risk screening, population screening                                                                                                                                                                                                                                              |
|                                 |                                                                                                                                                                                                                                                                                                                                                 |

SCHOLARONE™  
Manuscripts

# **Evaluating the Effectiveness of the NHS Health Check Programme in South England: a Quasi-Randomised Controlled Trial**

O. J. Kennedy<sup>1</sup> \* (0000-0001-7907-9118), F. Su<sup>2</sup>, R. Pears<sup>3</sup>, E Walmsley<sup>1</sup>, P. Roderick<sup>1</sup>

1. Primary Care & Population Sciences Faculty of Medicine, University of Southampton, Southampton, UK

O. J. Kennedy, Visiting Research Fellow

E Walmsley, Public Health Registrar

P. Roderick, Professor of Public Health

2. NHS South, Central and West Commissioning Support Unit, Eastleigh, Hampshire, UK

F. Su, Principal Information Analyst

3. Public Health Directorate, Hampshire County Council, Hampshire, UK

R. Pears, Public Health Consultant

Correspondence to: Oliver Kennedy at Primary Care & Population Sciences, Faculty of Medicine, University of Southampton, Southampton General Hospital, Mailpoint 801, South Academic Block, Tremona Road, Southampton, SO16 6YD (email: [ok4g13@soton.ac.uk](mailto:ok4g13@soton.ac.uk))

Word count: 5292

## **ABSTRACT**

**Objectives:** Evaluate uptake, risk factor detection and management from the National Health Service (NHS) Health Check (HC).

**Design:** Quasi-randomised controlled trial wherein participants were allocated to five cohorts based on birth year. Four cohorts were invited for an NHS HC between April 2011 and March 2015.

**Setting:** 151 General Practices in Hampshire, England, United Kingdom.

**Participants:** 366,005 participants born 1/4/1940 – 31/3/1976 eligible for an NHS HC.

**Intervention:** NHS HC invitation.

**Main outcome measures:** HC attendance and absolute percentage changes and odds ratios (ORs) of (i) detecting cardiovascular (CVD) 10-year risk >10% and >20%, smokers, total cholesterol (TC) >5.5 mmol/L and >7.5 mmol/L; (ii) diagnosing hypertension, type 2 diabetes mellitus (T2DM), chronic kidney disease (CKD) and atrial fibrillation (AF); and (iii) new interventions with statins, antihypertensives, antiglycaemics and nicotine replacement therapy (NRT).

**Results:** HC attendance rose from 12% to 30% between 2011/12 and 2014/15 ( $p < 0.001$ ). HC invitation increased detection of CVD risk >10% (2.0%-3.6,  $p < 0.001$ ) and >20% (0.1%-0.6%,  $p < 0.001-0.392$ ), TC >5.5 mmol/L (4.1%-7.0%,  $p < 0.001$ ) and >7.5 mmol/L (0.3%-0.4%  $p < 0.001$ ), hypertension (0.3%-0.6%,  $p < 0.001-0.003$ ), and interventions with statins (0.2%-0.9%,  $p < 0.001-0.017$ ) and antihypertensives (0.1%-0.6%,  $p < 0.001-0.205$ ). There were no consistent differences in detection of smokers, NRT, or diabetes, AF or CKD. Multivariate analyses showed associations between HC invitation and detecting CVD risk >10% (OR 8.01, 95% CI 7.34-8.73), >20% (5.86, 4.83-7.10), TC >5.5 mmol/L (3.72, 3.57-3.89), >7.5 mmol/L (2.89, 2.46-3.38), and diagnoses of hypertension (1.33, 1.20-1.47) and diabetes (1.34, 1.12-1.61). ORs of CVD risk >10% plus statin and >20% plus statin, respectively, were 2.90 (2.36-3.57) and 2.60 (1.92-3.52), and hypertension plus antihypertensive was 1.33 (1.18-1.50). There were no associations with AF, CKD, antiglycaemics or NRT. Detection of several risk factors varied inversely by deprivation.

**Conclusions:** HC invitation increased detection of cardiovascular risk factors, but corresponding increases in evidence-based interventions were modest.

### **STRENGTHS AND LIMITATIONS OF THIS STUDY**

- This is the first study to investigate outcomes associated with invitation for a National Health Service Health Check using a quasi-randomised method together with an intention-to-treat analysis.
- This study included a large population of 366,005 participants in a mixture of urban, semi-urban and rural settings.
- Invitation for a Health Check increased detection of cardiovascular risk factors, but this translated into only modest increases in evidence-based interventions.
- The follow-up of 6 months to 3.5 years limited assessment of patient relevant outcomes (e.g. incident cardiovascular disease).
- There was insufficient information to consider outcomes related to alcohol consumption and diet.

## **INTRODUCTION**

Cardiovascular disease (CVD) is a significant cause of mortality and morbidity worldwide,[1] and results in substantial global healthcare expenditure.[2] In 2009, the National Health Service (NHS) in England began a Health Check (HC) programme with the intention of identifying and managing individuals at higher risk of CVD or related conditions, such as diabetes mellitus and kidney disease, and preventing such conditions. This is similar to national programmes in other countries including in Canada[3] and the United States.[4] Modelling by the UK Department of Health suggested that the NHS HC programme could prevent 1,600 strokes and heart attacks each year, although the modelling assumptions, particularly with regard to uptake, may have overestimated effectiveness.[5] More recent estimation of the health benefits from microsimulation modelling using existing programme data suggest that the NHS HC programme results in approximately 300 fewer deaths and 1,000 people living free from disease (ischaemic heart disease, stroke, dementia and lung cancer) each year in England.[6]

Patients that are eligible to participate in the NHS HC programme are invited for HCs every five years. Patients are eligible if they are aged 40-74 and have no known CVD, diabetes, kidney disease or previous treatment with statins. The HC itself is performed in primary care, largely in general practice, and comprises an assessment of smoking status, diet, exercise, family history and more recently alcohol intake. Measurements are taken of body mass index (BMI), waist circumference, blood pressure (BP) and cholesterol, and a 10 year CVD risk score is calculated. Patients with systolic BP (SBP) or diastolic BP (DBP)  $\geq 140$  mmHg or 90 mmHg, respectively, have additional blood tests to measure kidney function. If impaired kidney function is detected, that is an estimated glomerular filtration rate (eGFR)  $< 60$  ml/min/1.73 m<sup>2</sup>, the blood test is repeated within two weeks to confirm a diagnosis of chronic kidney disease (CKD).[7] Any HC attendee with BMI  $\geq 30$  kg/m<sup>2</sup> ( $\geq 25$  kg/m<sup>2</sup> in non-white ethnic groups) or SBP or DBP above  $\geq 140$  mmHg or 90 mmHg, respectively, are also screened for type 2 diabetes mellitus (T2DM) by measuring glycated hemoglobin (HbA1c) or fasting glucose. If CVD risk factors are newly identified or conditions newly diagnosed during the HC, patients are offered appropriate management, including lifestyle advice, treatments and referrals to local services.

The HC programme has been contentious from its inception. There have been concerns of a lack of proven effectiveness to justify the yearly expenditure,[8] which is thought to be around £450 million.[9] A systematic review of randomised controlled trials found that general health checks provide no overall

1  
2  
3 reduction in CVD or cancer mortality, only an increase in risk factor recording and diagnoses.[10] The  
4 initial implementation of the NHS HC programme suffered early problems, such as low uptake,[11]  
5 variable implementation,[12] and poor understanding of the aims and purpose of the HC among some  
6 invitees.[13] In addition, there were concerns about inequitable distribution of the HC and a resultant  
7 widening of health inequalities.[9] Proponents of the NHS HC programme argue that existing  
8 randomised trials, the most recent of which started in 1999, are not representative of more effective  
9 modern HCs and intervention strategies.[14] In addition, since the early years, participation has  
10 increased, with a 2018 study reporting that 48.2% of those invited for a HC have now attended.[15]  
11 Strategies have also increased uptake among some deprived and ethnic minority populations to or  
12 above the average.[16]

13  
14 A number of studies have evaluated the effectiveness of the NHS HC programme.[16,17] HC  
15 attendance has been associated with increased CVD risk factor recording, detection of  
16 hypercholesterolaemia and hypertension, and increased prescribing of statins comparing attendees  
17 and matched non-attendees (hazard ratio [HR] 1.58, 95% 1.53–1.63) and antihypertensives (HR 1.06,  
18 95% 1.03–1.10).[17] HC attendees have also been shown to have reduced CVD risk scores, blood  
19 pressures and serum lipids a year afterwards.[18] However, a significant limitation of existing studies is  
20 that they have used observational data comparing HC attendees and non-attendees. Only a proportion  
21 of those invited for a HC actually attend, and those attending are not representative of the eligible  
22 population.[16,17] This study aims to evaluate the effect of invitation for a HC (i.e. not just attendance)  
23 in terms of uptake and risk factor detection and management in eligible participants.

## 24 **METHODS**

### 25 **Study population and data source**

26  
27 This study took place in Hampshire, a region in the south of England comprising over 1.5 million  
28 residents in a mixture of urban, suburban and rural settings. In Hampshire, the HC is commissioned by  
29 three Local Authorities: Southampton City Council, Portsmouth City Council and Hampshire County  
30 Council. The two largest urban areas in Hampshire are the cities of Southampton and Portsmouth, each  
31 with a population of around 200,000-250,000. There were 151 General Practices that contributed data  
32 to this study, around 80% of the total in the region. The organisation of the HC programme in Hampshire  
33 involved assigning eligible patients into five separate cohorts. Cohort assignment was based on date  
34  
35  
36  
37  
38  
39  
40  
41  
42  
43  
44  
45  
46  
47  
48  
49  
50  
51  
52  
53  
54  
55  
56  
57  
58  
59  
60

1  
2  
3 of birth (DOB), although the cohorts had comparable means and distributions of ages. This method of  
4 assignment (i.e. based on birth year) constituted a form of “quasi-randomisation”.[19] Specifically,  
5 patients with years of birth ending in “0” or “5” were assigned to one cohort, “1” or “6” to another cohort,  
6 “2” or “7” to another and so forth, mirroring the quinquennial invitation system used for NHS breast  
7 cancer screening. The first cohort (cohort 1) was invited for a HC in the year 1<sup>st</sup> April 2011 to 31<sup>st</sup> March  
8 2012, while the subsequent cohorts (cohorts 2-5) were invited in the years beginning 1<sup>st</sup> April 2012-15.  
9 The study period was from 1<sup>st</sup> April 2011 to 31<sup>st</sup> March 2015. During this time, cohorts 1-4 were invited  
10 for HCs. Cohort 5 was eligible for a HC but not invited (i.e. until after the follow-up period ended) and  
11 was our control group. We compared outcomes in each of the invited cohorts 1-4 separately against  
12 those in cohort 5. The exact follow-up periods depended on the cohorts being compared and are  
13 described below.

14  
15 The population for this study were eligible for a HC on 1<sup>st</sup> April 2011. This required a DOB between 1<sup>st</sup>  
16 April 1940 - 31<sup>st</sup> March 1976 and (as of 1<sup>st</sup> April 2011) (i) no history of vascular disease (e.g. coronary  
17 artery disease, cerebrovascular disease, atherosclerosis, peripheral vascular disease (PVD) or  
18 circulatory system disease); (ii) no previous diagnosis of hypertension, diabetes, CKD, atrial fibrillation  
19 (AF), heart failure (HF), stroke or transient ischaemic attack (TIA); and (iii) no pre-existing records of  
20 receiving statins prescription, palliative care, a health check, or CVD risk assessment. These medical  
21 eligibility criteria matched the criteria used locally by general practices (GPs) to identify and invite  
22 participants to participate in the HC programme. The Read Codes for eligibility and outcomes are  
23 included as supplementary information. Using the participants DOBs, we assigned them into cohorts  
24 1-5 to identify the years they were invited for a HC between 1<sup>st</sup> April 2011 and 31<sup>st</sup> March 2015 (or not  
25 invited in the case of cohort 5). As is explained below, for some analyses, we reapplied the eligibility  
26 criteria to identify participants still eligible for a HC at the start of each invitation year.

27  
28 As there was a temporary pause in sending out HC invitations during the first half of the year beginning  
29 1<sup>st</sup> April 2012 in the Hampshire County Council Local Authority, we excluded patients belonging to  
30 cohort 2 living in that area (~40,000 participants). We excluded patients with no recorded DOB (6,641)  
31 or no GP attendance record before 1<sup>st</sup> April 2011 (26,774), as we assumed that those patients had  
32 moved into the area after the start of the follow-up. We excluded patients with medical records not  
33 formatted according to Read Codes Version 2 (~70,000). In total, we excluded around 35% of the  
34 population.



1  
2  
3 We acquired data for this study from the Hampshire Health Record Analytical database (HHRA). At the  
4 time of the study, the HHRA linked anonymised clinical records from 151 primary care practices,  
5 secondary care (e.g. inpatient, outpatient, and accident and emergency) from 3 acute (hospital) NHS  
6 trusts, and laboratory and pathology tests. The HHRA also contained deprivation indices for the  
7 populations served by the included GP practices. The HHRA covers a registered population of around  
8 1.5 million patients. Unfortunately, the organisation of the HHRA is such that some patients who die are  
9 removed from the database. As such, we did not use mortality or CVD events, which frequently result  
10 in death, as outcomes.  
11  
12

### 13 **Information extracted and outcome measures**

14  
15 For each participant, we extracted from HHRA data concerning HC attendance, age, gender and  
16 individual level deprivation (IMD) at baseline. Ethnicity was poorly recorded (50% missing) and, in any  
17 case, this information was not released for analysis due to concerns about identifiability. We extracted  
18 data for the following outcomes: (i) recording of BP, total serum cholesterol (TC), smoking status (i.e.,  
19 “current smoker”, “ex-smoker”, and “never smoker”), BMI, and 10-year CVD risk score (e.g.  
20 Framingham and QRISK); (ii) detection of CVD risk score >10%, CVD risk score >20%, current smoker,  
21 TC >5.5 mmol/L, TC >7.5 mmol/L, and BMI >30 kg/m<sup>2</sup>; (iii) new diagnoses of hypertension, AF, diabetes  
22 and CKD (≥ stage 3); and (iv) new interventions with statins, antihypertensives, antiglycaemic  
23 medication, nicotine replacement therapy (NRT), anti-obesity medication, stop-smoking advice/referral  
24 and weight management advice/referral. We identified outcomes only where corresponding Read  
25 Codes had been recorded (e.g. we did not assume that BMI had been measured just because a weight  
26 management referral had been made). Data were extracted from the HHRA in January 2017.  
27  
28  
29  
30  
31  
32  
33  
34  
35  
36  
37  
38  
39  
40  
41  
42  
43  
44

### 45 **Follow-up periods and statistical analysis**

46  
47 For each cohort overall and for HC attendees / non-attendees within each cohort separately, we  
48 calculated baseline means and standard deviations of age, gender and IMD. We calculated proportions  
49 (%) with outcomes occurring between 1<sup>st</sup> April 2011 and 31<sup>st</sup> March 2015. We calculated absolute  
50 differences in these proportions for each of cohorts 1-4 vs. 5 (i.e. invited vs non-invited) as well as the  
51 range (i.e. of absolute differences for cohorts 1-4 vs. 5). We also compared proportions with outcomes  
52 among attendees and non-attendees. A chi-square test was used to test for equality between  
53 proportions. .  
54  
55  
56  
57  
58  
59  
60

1  
2  
3 In the second stage of our analysis, we calculated odds ratios (ORs) for each outcome. We employed  
4 multivariable logistic regression models adjusted for age and gender. We calculated ORs for each  
5 invited cohort (i.e. cohorts 1-4) separately, with the reference being uninvited cohort 5. The rationale  
6 for this approach was to capture changes in performance over a time period when awareness and  
7 experience among patients and providers was increasing. Evaluation of earlier years (e.g. cohort 1) is  
8 still of interest because of longer follow-up, but the most recently invited cohort (i.e. cohort 4) may be  
9 most reflective of current practice. Finally, to examine whether the impact of the programme differed  
10 by deprivation, we re-ran the regression analysis for the most recently invited cohort (i.e. cohort 4) vs.  
11 uninvited cohort 5 while including an interaction term for IMD.  
12  
13  
14  
15  
16  
17  
18  
19

20 All analyses were by intention-to-treat. We did sensitivity analysis by excluding those who attended  
21 opportunistically. In these analyses, follow-up was from the start of the invitation year of the invited  
22 cohort until 31<sup>st</sup> March 2015. Specifically, for cohorts 1-4 vs. 5, follow-up periods were from 1<sup>st</sup> April  
23 2011, 1<sup>st</sup> April 2012, 1<sup>st</sup> April 2013, 1<sup>st</sup> April 2014, respectively, until 31<sup>st</sup> March 2015. We included only  
24 participants still eligible at the start of the invitation year. As invitations were sent out throughout each  
25 year rather than all at the start, participants were invited on average six months from the start of their  
26 invitation years. This corresponds to follow-up periods for comparisons of cohorts 1-4 vs. 5, respectively,  
27 of 3.5, 2.5, 1.5 and 0.5 years. This study received ethical approval from the Research Ethics Committee  
28 at the University of Southampton ID: 24358) and approval from the Hampshire Health Record  
29 Information Governance Group. Data extraction was implemented using SQL server 2008 R2, and  
30 statistical analyses were conducted using R (Version 3.5.1, R Foundation for Statistical Computing,  
31 Vienna, Austria).[20]  
32  
33  
34  
35  
36  
37  
38  
39  
40  
41  
42  
43

#### 44 **Patient and public involvement**

45 There were no patients directly involved in the planning or design of this study.  
46  
47

### 48 **RESULTS**

#### 49 **Study sample and baseline characteristics**

50  
51 The derivation of the study population and five cohorts is shown in figure 1. 399,420 met our inclusion  
52 criteria and had medical records formatted as Read Codes Version 2. From those, we excluded 6,641  
53 without a recorded DOB and a further 26,774 patients without entries in their health records from before  
54 1<sup>st</sup> April 2011 who likely moved into Hampshire after the start of the follow-up period. The remaining  
55  
56  
57  
58  
59  
60

1  
2  
3 366,005 participants formed our study population. Table 1 summarises their baseline characteristics  
4 broken down into cohorts 1-5. The cohorts had similar proportions of male gender (within 1%) and mean  
5 deprivation scores (within one centile). The cohorts differed more markedly in mean age, although the  
6 maximum difference was just 3 years between cohorts 1 and 5. The age differences reflected the HC  
7 invitation system in Hampshire which, as is described above, is based on DOB. However, figure 2  
8 comprises histograms showing broadly similar distributions of ages within each cohort.  
9  
10  
11  
12  
13  
14  
15  
16  
17  
18  
19  
20  
21  
22  
23  
24  
25  
26  
27  
28  
29  
30  
31  
32  
33  
34  
35  
36  
37  
38  
39  
40  
41  
42  
43  
44  
45  
46  
47  
48  
49  
50  
51  
52  
53  
54  
55  
56  
57  
58  
59  
60

For peer review only

**Table 1.** Demographic information of the five cohorts overall and broken down into HC attendees and non-attendees within each cohort.

|                      | Cohort 1        |          |          | Cohort 2        |          |          | Cohort 3        |          |          | Cohort 4        |          |          | Cohort 5        |          |          |
|----------------------|-----------------|----------|----------|-----------------|----------|----------|-----------------|----------|----------|-----------------|----------|----------|-----------------|----------|----------|
|                      | All             | Att      | DNA      | All             | Att*     | DNA      |
| n                    | <b>76146</b>    | 9464     | 66682    | <b>39232</b>    | 9868     | 29364    | <b>80220</b>    | 19991    | 60229    | <b>81676</b>    | 21188    | 60488    | <b>88731</b>    | 4232     | 84499    |
| % male               | <b>47.5</b>     | 45.6     | 47.8     | <b>46.5</b>     | 40.7     | 48.3     | <b>47.0</b>     | 41.0     | 49.0     | <b>47.4</b>     | 41.9     | 49.3     | <b>47.2</b>     | 48.0     | 47.1     |
| Age range            | <b>(40, 70)</b> | (40, 70) | (40, 70) | <b>(39, 69)</b> | (39, 69) | (39, 69) | <b>(38, 68)</b> | (38, 68) | (38, 68) | <b>(37, 67)</b> | (37, 67) | (37, 67) | <b>(36, 71)</b> | (36, 71) | (36, 71) |
| Mean age (SD)        | <b>51(9.0)</b>  | 54(9.9)  | 50(8.7)  | <b>50(9.1)</b>  | 53(9.5)  | 49(8.7)  | <b>49(9.0)</b>  | 52(9.6)  | 48(8.6)  | <b>48(9.9)</b>  | 51(9.4)  | 47(8.8)  | <b>48(9.5)</b>  | 59(10.4) | 48(9.5)  |
| Mean IMD decile (SD) | <b>7.3(2.6)</b> | 7.8(2.4) | 7.3(2.6) | <b>7.3(2.6)</b> | 7.9(2.3) | 7.2(2.7) | <b>7.3(2.6)</b> | 7.7(2.4) | 7.2(2.7) | <b>7.3(2.6)</b> | 7.7(2.4) | 7.2(2.7) | <b>7.3(2.6)</b> | 7.5(2.6) | 7.3(2.6) |

Attended (Att), number (n), did not attend (DNA), standard deviation (SD), Index of Multiple Deprivation (IMD - 1 = most deprived decile, 10 = least deprived), \*some participants in cohort 5 attended a HC opportunistically (i.e. without receiving a formal invitation)

1  
2  
3 HC attendees in all cohorts were more likely to be female, older and less deprived compared to those  
4 who did not attend (Table 1). Proportions within each invited cohort (i.e. cohorts 1-4) attending HCs  
5 increased year on year during the follow-up, and for cohorts 1-4 were 12%, 27%, 28% and 30%,  
6  
7 respectively. Despite not being formally invited, a number of patients in cohort 5 attended a HC during  
8  
9 the follow-up period. These patients had likely responded to local or national advertising for the HC  
10  
11 programme or had been offered HCs opportunistically by their GPs.  
12  
13

### 14 15 **Proportions of risk factor recording, detection, diagnoses and interventions**

16  
17 Table 2 summarises the proportions of patients with recording and detection of risk factors, new  
18  
19 diagnoses, and new interventions during the follow-up period, which varied by cohort. The results are  
20  
21 shown for each cohort overall and separately for attendees and non-attendees within each cohort.  
22  
23 Given the large sample size, even small differences in proportions between cohorts were frequently  
24  
25 highly significant (see supplementary information for p-values). Proportions generally increased year  
26  
27 on year for cohorts 1-4, reflecting increasing attendance, and were lowest in the uninvited cohort 5.  
28  
29 There were significant ( $p < 0.001$ ) increases in absolute proportions in invited cohorts 1-4 with recorded  
30  
31 BP (range for cohorts 1-4 vs. 5 = 4.9%-7.9%), BMI (5.0%-13.4%), TC (8.4%-17.4%), CVD risk (7.4%-  
32  
33 19.6%) and smoking status (2.8%-7.0%). There were also significant increases in detection of CVD risk  
34  
35  $>10\%$  (2.0%-3.6%), SBP  $>140$  / DBP  $>90$  (1.0%-2.1%), BMI  $>30$  kg/m<sup>2</sup> (0.9%-2.5%), TC  $>5.5$  mmol/L  
36  
37 (4.1%-7.0%) and TC  $>7.5$  mmol/L (0.3%-0.4%). There were more modest or not consistently significant  
38  
39 differences in proportions with detected CVD risk  $>20\%$  (0.1%-0.6%) and current smoking (-0.3%-  
40  
41 0.5%).  
42

43  
44 The proportions with detection of risk factors among those with recordings were lower in the invited  
45  
46 cohorts (i.e. 1-4) compared to uninvited cohort 5, particularly for CVD risk  $>10\%$  (-11.5% - -2.9%),  $>20\%$   
47  
48 (-6.1% - -1.8%) and BMI  $>30$  kg/m<sup>2</sup> (-2.8% - -1.0%). Even though smaller absolute numbers of high-  
49  
50 risk patients were identified by opportunistic testing, these data suggest a higher positive predictive  
51  
52 value of opportunistic testing compared to the HC, which may reflect different risk profiles of patients.  
53

54  
55 HC resulted in minor or no increases in proportions with new diagnoses of hypertension (0.3%-0.6%),  
56  
57 AF (0.0%-0.1%), CKD (0.0%-0.1%) or diabetes (0.0%-0.1%). There were minor increases in proportions  
58  
59 receiving statins (0.2%-0.9%), antihypertensives (0.2%-0.6%) and stop smoking advice (0.4%-0.9%),  
60

1  
2  
3 but no consistent difference in antiglycaemics (-0.1%-0.0%), NRT (0.0%) or anti-obesity medications  
4  
5 (0.0%). There was an increase in weight advice / referrals (4.6%-10.5%).  
6  
7  
8  
9  
10  
11  
12  
13  
14  
15  
16  
17  
18  
19  
20  
21  
22  
23  
24  
25  
26  
27  
28  
29  
30  
31  
32  
33  
34  
35  
36  
37  
38  
39  
40  
41  
42  
43  
44  
45  
46  
47  
48  
49  
50  
51  
52  
53  
54  
55  
56  
57  
58  
59  
60

For peer review only

**Table 2.** Proportions of participants with risk factor recording / detection, new diagnoses and new interventions in each of the five cohorts overall and for HC attendees and non-attendees within each cohort separately.

|                                                       | C1   |      |      | C2   |      |      | C3   |      |      | C4   |      |      | C5   |      |      |
|-------------------------------------------------------|------|------|------|------|------|------|------|------|------|------|------|------|------|------|------|
|                                                       | All  | Att  | DNA  |
| <b>RECORDING %</b>                                    |      |      |      |      |      |      |      |      |      |      |      |      |      |      |      |
| BP                                                    | 72.3 | 98.6 | 68.5 | 75.2 | 98.6 | 67.3 | 74.3 | 98.7 | 66.3 | 73.3 | 98.6 | 64.4 | 67.3 | 99.1 | 65.7 |
| BMI                                                   | 48.4 | 97.7 | 41.4 | 56.5 | 98.5 | 42.3 | 56.5 | 98.5 | 42.5 | 56.8 | 98.6 | 42.2 | 43.4 | 98.0 | 40.6 |
| TC                                                    | 41.5 | 97.6 | 33.6 | 49.5 | 97.1 | 33.6 | 49.4 | 97.0 | 33.6 | 50.6 | 97.2 | 34.2 | 33.1 | 96.1 | 30.0 |
| CVD risk                                              | 23.0 | 89.0 | 13.7 | 32.8 | 89.4 | 13.8 | 33.2 | 89.1 | 14.7 | 35.3 | 92.3 | 15.3 | 15.7 | 90.2 | 11.9 |
| Smoking status                                        | 71.8 | 98.5 | 68.1 | 75.8 | 98.9 | 68.0 | 75.7 | 98.7 | 68.1 | 76.0 | 98.4 | 68.2 | 69.0 | 98.7 | 67.6 |
| <b>DETECTION %</b>                                    |      |      |      |      |      |      |      |      |      |      |      |      |      |      |      |
| CVD risk >10%                                         | 7.7  | 29.0 | 4.7  | 9.3  | 23.0 | 4.7  | 9.0  | 22.2 | 4.6  | 8.8  | 20.7 | 4.6  | 5.7  | 44.5 | 3.8  |
| % of CVD risk recorded with >10%                      | 33.6 | 32.6 | 34.5 | 28.4 | 25.7 | 34.3 | 27.0 | 24.9 | 31.1 | 24.9 | 22.5 | 30.1 | 36.4 | 49.3 | 31.5 |
| CVD risk >20%                                         | 2.2  | 8.1  | 1.3  | 2.4  | 5.2  | 1.4  | 2.1  | 4.4  | 1.3  | 1.8  | 3.6  | 1.2  | 1.8  | 15.0 | 1.1  |
| % of CVD risk recorded with >20%                      | 9.4  | 9.1  | 9.6  | 7.2  | 5.8  | 10.1 | 6.3  | 5.0  | 9.1  | 5.1  | 3.9  | 7.8  | 11.2 | 16.6 | 9.1  |
| SBP >140 or DBP > 90 mmHg                             | 17.8 | 24.6 | 16.8 | 17.5 | 20.1 | 16.6 | 17.3 | 20.6 | 16.3 | 16.6 | 19.7 | 15.6 | 15.7 | 29.9 | 14.9 |
| % of BP recorded with >140 or >90                     | 24.6 | 25.0 | 24.5 | 23.3 | 20.4 | 24.7 | 23.3 | 20.8 | 24.5 | 22.7 | 20.0 | 24.2 | 23.3 | 30.2 | 22.7 |
| Current smoker                                        | 20.7 | 17.0 | 21.2 | 20.8 | 14.6 | 22.8 | 20.9 | 14.4 | 23.1 | 21.4 | 16.3 | 23.2 | 20.9 | 18.4 | 21.1 |
| % of smoking status recorded who currently smoke      | 28.8 | 17.3 | 31.1 | 27.4 | 14.8 | 33.6 | 27.6 | 14.6 | 33.9 | 28.2 | 16.6 | 34.1 | 30.3 | 18.6 | 31.2 |
| BMI >30 kg/m <sup>2</sup>                             | 12.6 | 18.0 | 11.9 | 13.9 | 17.6 | 12.7 | 13.8 | 17.9 | 12.4 | 14.3 | 19.7 | 12.3 | 11.8 | 20.1 | 11.4 |
| % BMI recoded with >30                                | 26.1 | 18.5 | 28.7 | 24.7 | 17.9 | 30.0 | 24.4 | 18.2 | 29.1 | 25.1 | 20.0 | 29.2 | 27.2 | 20.5 | 28.0 |
| TC >5.5 mmol/L                                        | 19.1 | 44.1 | 15.5 | 22.0 | 43.1 | 14.9 | 21.4 | 41.4 | 14.8 | 21.6 | 39.8 | 15.2 | 15.0 | 48.8 | 13.3 |
| % of TC recorded with >5.5 mmol/L                     | 46.0 | 45.2 | 46.2 | 44.3 | 44.4 | 44.3 | 43.3 | 42.7 | 43.9 | 42.7 | 40.9 | 44.4 | 45.3 | 50.8 | 44.4 |
| TC >7.5 mmol/L                                        | 1.4  | 2.7  | 1.2  | 1.5  | 2.4  | 1.2  | 1.5  | 2.5  | 1.1  | 1.5  | 2.3  | 1.3  | 1.1  | 3.3  | 1.0  |
| % of TC recorded with >7.5 mmol/L                     | 3.3  | 2.8  | 3.6  | 3.1  | 2.5  | 3.6  | 3.0  | 2.6  | 3.3  | 3.1  | 2.4  | 3.8  | 3.4  | 3.4  | 3.4  |
| <b>DIAGNOSES %</b>                                    |      |      |      |      |      |      |      |      |      |      |      |      |      |      |      |
| Hypertension                                          | 4.2  | 4.7  | 4.1  | 4.1  | 3.7  | 4.3  | 3.9  | 3.0  | 4.2  | 4.0  | 2.5  | 4.5  | 3.6  | 6.5  | 3.5  |
| % of SBP >140 or DBP > 90 with hypertension diagnosis | 18.0 | 15.1 | 18.7 | 17.7 | 13.6 | 19.3 | 17.5 | 11.5 | 20.1 | 17.8 | 9.3  | 21.6 | 17.3 | 16.4 | 17.4 |
| AF                                                    | 0.5  | 0.5  | 0.5  | 0.4  | 0.4  | 0.4  | 0.4  | 0.4  | 0.5  | 0.4  | 0.2  | 0.4  | 0.4  | 0.9  | 0.3  |
| CKD                                                   | 0.3  | 0.3  | 0.3  | 0.3  | 0.4  | 0.3  | 0.3  | 0.2  | 0.3  | 0.3  | 0.1  | 0.3  | 0.2  | 0.6  | 0.2  |
| Diabetes                                              | 1.3  | 0.9  | 1.3  | 1.2  | 0.7  | 1.4  | 1.3  | 0.6  | 1.5  | 1.3  | 0.6  | 1.6  | 1.2  | 1.2  | 1.2  |
| <b>INTERVENTIONS %</b>                                |      |      |      |      |      |      |      |      |      |      |      |      |      |      |      |
| Statin                                                | 4.9  | 7.7  | 4.5  | 5.0  | 5.6  | 4.8  | 4.4  | 4.5  | 4.4  | 4.3  | 3.3  | 4.6  | 4.0  | 13.0 | 3.6  |
| % of CVD>10% prescribed statins                       | 22.5 | 16.5 | 27.8 | 18.8 | 12.7 | 28.8 | 17.6 | 11.4 | 27.5 | 16.2 | 9.3  | 27.0 | 23.6 | 19.0 | 26.2 |
| % of CVD>20% prescribed statins                       | 40.7 | 31.5 | 48.8 | 37.9 | 28.7 | 49.4 | 38.2 | 27.4 | 50.2 | 36.5 | 23.0 | 50.8 | 41.9 | 33.9 | 47.5 |
| Antihypertensive                                      | 7.6  | 8.0  | 7.5  | 7.7  | 6.9  | 7.9  | 7.3  | 6.1  | 7.7  | 7.2  | 5.8  | 7.7  | 7.1  | 10.6 | 6.9  |
| % of hypertensives prescribed antihypertensive        | 78.5 | 79.6 | 78.3 | 78.5 | 77.7 | 78.7 | 78.4 | 79.3 | 78.2 | 77.7 | 77.3 | 77.8 | 78.3 | 85.0 | 77.7 |
| Antiglycaemics                                        | 1.1  | 0.7  | 1.2  | 1.0  | 0.6  | 1.2  | 1.1  | 0.5  | 1.3  | 1.2  | 0.5  | 1.4  | 1.1  | 1.1  | 1.1  |
| % of diabetics prescribed antiglycaemics              | 74.2 | 66.7 | 74.9 | 74.4 | 66.7 | 75.7 | 74.9 | 60.5 | 76.9 | 73.2 | 59.2 | 75.1 | 76.7 | 73.1 | 76.9 |
| NRT                                                   | 1.1  | 0.9  | 1.1  | 1.1  | 0.9  | 1.2  | 1.1  | 0.8  | 1.2  | 1.1  | 0.8  | 1.2  | 1.1  | 1.2  | 1.1  |
| % of current smokers prescribed NRT                   | 4.6  | 4.7  | 4.5  | 4.7  | 5.2  | 4.6  | 4.7  | 5.1  | 4.7  | 4.6  | 4.4  | 4.6  | 4.6  | 6.2  | 4.6  |
| Stop smoking advice                                   | 7.4  | 9.9  | 7.1  | 7.9  | 8.5  | 7.8  | 7.6  | 7.7  | 7.5  | 7.7  | 8.4  | 7.5  | 7.0  | 10.3 | 6.9  |

|                                                       |             |      |      |             |      |      |             |      |      |             |      |      |             |      |      |
|-------------------------------------------------------|-------------|------|------|-------------|------|------|-------------|------|------|-------------|------|------|-------------|------|------|
| % of current smokers given advice                     | <b>22.8</b> | 26.8 | 22.4 | <b>23.7</b> | 24.5 | 23.5 | <b>22.7</b> | 23.5 | 22.6 | <b>22.7</b> | 23.8 | 22.5 | <b>22.3</b> | 25.3 | 22.1 |
| Weight advice/referral                                | <b>12.9</b> | 55.5 | 6.8  | <b>18.3</b> | 52.3 | 6.8  | <b>18.4</b> | 51.7 | 7.4  | <b>18.8</b> | 49.6 | 8.0  | <b>8.3</b>  | 55.7 | 5.9  |
| % of BMI>30 kg/m <sup>2</sup> given advice/referral   | <b>26.8</b> | 63.2 | 19.0 | <b>31.5</b> | 60.1 | 18.2 | <b>33.3</b> | 60.0 | 20.6 | <b>34.4</b> | 57.7 | 21.3 | <b>20.8</b> | 60.8 | 17.2 |
| Anti-obesity                                          | <b>0.3</b>  | 0.2  | 0.3  | <b>0.3</b>  | 0.2  | 0.4  | <b>0.3</b>  | 0.3  | 0.3  | <b>0.3</b>  | 0.3  | 0.3  | <b>0.3</b>  | 0.2  | 0.3  |
| % of BMI>30 kg/m <sup>2</sup> prescribed anti-obesity | <b>1.8</b>  | 1.0  | 2.0  | <b>2.0</b>  | 0.9  | 2.5  | <b>1.8</b>  | 1.2  | 2.1  | <b>1.8</b>  | 1.0  | 2.2  | <b>2.1</b>  | 0.7  | 2.2  |

Attended (Att), Blood pressure (BP), body mass index (BMI), total cholesterol (TC), cardiovascular disease (CVD), systolic blood pressure (SBP), diastolic blood pressure (DBP), atrial fibrillation (AF), chronic kidney disease (CKD), Nicotine replacement therapy (NRT)

For peer review only



1  
2  
3 Proportions receiving statins were lower among HC invited cohorts compared to non-invited following  
4 detection of CVD risk >10% (-7.4% - -1.1%) and >20% (-5.5% - -1.2%). Similarly, antiglycaemic  
5 interventions among new cases of diabetes were lower (-3.5% - -1.8%), as were new anti-obesity  
6 prescriptions following detection of BMI >30 kg/m<sup>2</sup> (-0.3% - -0.1%). Differences in proportions receiving  
7 antihypertensives following new hypertension diagnoses were inconsistent (-0.6% - 0.2%), but there  
8 was an increase in proportions among HC invitees receiving weight advice / referral following detection  
9 of BMI >30 kg/m<sup>2</sup> (6.0%-13.6%).  
10  
11

### 12 **Odds ratios of risk factor detection, diagnoses and interventions**

13  
14 Table 3 summarises the ORs and 95% confidence intervals from the regression analyses. Compared  
15 to uninvited cohort 5 (including and excluding those who attended opportunistically), the odds of  
16 detection of risk factors, new diagnoses and interventions were generally higher in invited cohorts 1-4,  
17 and they increased year on year throughout the study period. For cohort 4 vs. 5, there were large and  
18 significant increases in the odds of detecting CVD risk >10% (OR 8.01, 7.34-8.73), CVD risk >20% (OR  
19 5.86, 4.83-7.10) TC >5.5 mmol/L (OR 3.72, 3.57-3.89), TC >7.5 mmol/L (OR 2.89, 2.46-3.38) and BMI >  
20 30 kg/m<sup>2</sup> (OR 2.05, 1.96-2.14). These may be conservative given that the average follow-up was just 6  
21 months, and for some participants almost none, while many outcomes from the HC would likely take  
22 longer to occur. There were significant increases in detection of current smokers (OR 1.22, 1.18-1.26)  
23 and elevated BP (OR 1.64, 1.57-1.70). There were modest increases in new diagnoses of hypertension  
24 (OR 1.33, 1.20-1.47) and diabetes (OR 1.34, 1.12-1.61), but not AF (OR 1.00, 0.72-1.39) or CKD (OR  
25 0.69, 0.36-1.32). In terms of new interventions, there were increases in weight advice / referrals (OR  
26 8.36, 7.89-8.86), stop smoking advice (OR 1.65, 1.51-1.79), statins (OR 1.54, 1.39-1.71) and  
27 antihypertensives (OR 1.15, 1.06-1.24). The ORs of CVD risk >10% plus statin or >20% plus statin,  
28 respectively, were 2.90 (2.36-3.57) and 2.60 (1.92-3.52). The OR of hypertension diagnosis plus  
29 antihypertensive treatment was 1.33 (1.18-1.50). There were no significant differences in prescriptions  
30 of NRT (OR 0.92, 0.71-1.20), antiglycaemics (OR 1.18, 0.97-1.44) or anti-obesity medications (OR 1.00,  
31 0.68-1.48).  
32  
33  
34  
35  
36  
37  
38  
39  
40  
41  
42  
43  
44  
45  
46  
47  
48  
49  
50  
51  
52  
53  
54  
55  
56  
57  
58  
59  
60

**Table 3.** Age and gender adjusted odds ratios with 95% confidence intervals for associations between invitation for an NHS health check and the detection of CVD risk factors, new diagnoses and interventions. Results are shown for the comparisons of cohorts 1-4 against all of cohort 5 and against patients in cohort 5 who we confirmed did not attend (DNA) a HC incidentally.

|                           | Cohort1 vs       |                  | Cohort2 vs       |                  | Cohort3 vs       |                  | Cohort4 vs       |                     |
|---------------------------|------------------|------------------|------------------|------------------|------------------|------------------|------------------|---------------------|
|                           | Cohort5 All      | Cohort5 DNA         |
| <b>DETECTION %</b>        |                  |                  |                  |                  |                  |                  |                  |                     |
| CVD risk >10%             | 1.20 (1.15-1.25) | 1.71 (1.64-1.80) | 1.93 (1.82-2.04) | 2.66 (2.50-2.83) | 3.28 (3.08-3.50) | 3.98 (3.71-4.27) | 8.01 (7.34-8.73) | 11.17 (10.13-12.33) |
| CVD risk >20%             | 1.07 (0.99-1.15) | 1.49 (1.37-1.63) | 1.44 (1.29-1.61) | 1.90 (1.69-2.15) | 2.83 (2.48-3.23) | 3.12 (2.72-3.58) | 5.86 (4.83-7.10) | 7.18 (5.82-8.85)    |
| SBP >140 or DBP > 90 mmHg | 1.04 (1.01-1.07) | 1.06 (1.03-1.09) | 1.08 (1.05-1.12) | 1.10 (1.06-1.14) | 1.23 (1.19-1.27) | 1.26 (1.21-1.30) | 1.64 (1.57-1.70) | 1.69 (1.62-1.76)    |
| Current smoker            | 1.03 (1.01-1.06) | 1.03 (1.01-1.06) | 1.05 (1.02-1.09) | 1.05 (1.02-1.09) | 1.05 (1.02-1.08) | 1.05 (1.03-1.08) | 1.22 (1.18-1.26) | 1.23 (1.19-1.27)    |
| BMI >30 kg/m <sup>2</sup> | 1.09 (1.06-1.12) | 1.14 (1.11-1.18) | 1.26 (1.21-1.31) | 1.31 (1.26-1.36) | 1.46 (1.41-1.51) | 1.52 (1.47-1.58) | 2.05 (1.96-2.14) | 2.18 (2.09-2.28)    |
| TC >5.5 mmol/L            | 1.19 (1.16-1.23) | 1.33 (1.29-1.37) | 1.67 (1.61-1.72) | 1.83 (1.77-1.90) | 2.10 (2.03-2.17) | 2.27 (2.19-2.34) | 3.72 (3.57-3.89) | 4.20 (4.02-4.39)    |
| TC >7.5 mmol/L            | 1.12 (1.02-1.22) | 1.19 (1.08-1.30) | 1.42 (1.26-1.59) | 1.52 (1.35-1.71) | 1.66 (1.47-1.87) | 1.76 (1.56-1.99) | 2.89 (2.46-3.38) | 3.15 (2.67-3.72)    |
| <b>DIAGNOSES %</b>        |                  |                  |                  |                  |                  |                  |                  |                     |
| HTN                       | 1.04 (0.99-1.09) | 1.03 (0.98-1.09) | 1.06 (0.98-1.14) | 1.04 (0.97-1.12) | 1.10 (1.02-1.19) | 1.10 (1.02-1.19) | 1.33 (1.20-1.47) | 1.34 (1.20-1.48)    |
| AF                        | 1.14 (0.98-1.32) | 1.11 (0.95-1.30) | 0.91 (0.72-1.14) | 0.89 (0.71-1.13) | 1.33 (1.06-1.67) | 1.31 (1.05-1.65) | 1.00 (0.72-1.39) | 1.01 (0.72-1.40)    |
| CKD                       | 1.01 (0.84-1.22) | 0.98 (0.81-1.19) | 1.22 (0.93-1.61) | 1.18 (0.90-1.57) | 1.08 (0.77-1.51) | 1.06 (0.76-1.49) | 0.69 (0.36-1.32) | 0.68 (0.36-1.30)    |
| Diabetes                  | 0.99 (0.91-1.08) | 0.97 (0.88-1.06) | 0.95 (0.84-1.09) | 0.94 (0.82-1.07) | 1.12 (0.99-1.28) | 1.12 (0.98-1.27) | 1.34 (1.12-1.61) | 1.36 (1.13-1.64)    |
| <b>INTERVENTIONS %</b>    |                  |                  |                  |                  |                  |                  |                  |                     |
| Statin                    | 1.06 (1.01-1.11) | 1.12 (1.06-1.18) | 1.17 (1.09-1.25) | 1.21 (1.13-1.30) | 1.26 (1.16-1.35) | 1.27 (1.18-1.37) | 1.54 (1.39-1.71) | 1.58 (1.42-1.76)    |
| Antihypertensive          | 0.99 (0.95-1.03) | 0.99 (0.95-1.03) | 1.04 (0.99-1.10) | 1.04 (0.98-1.09) | 1.04 (0.98-1.10) | 1.04 (0.98-1.10) | 1.15 (1.06-1.24) | 1.15 (1.07-1.24)    |
| Antiglycaemics            | 0.93 (0.85-1.02) | 0.92 (0.83-1.01) | 0.90 (0.79-1.04) | 0.90 (0.78-1.03) | 1.04 (0.91-1.20) | 1.03 (0.90-1.19) | 1.18 (0.97-1.44) | 1.19 (0.97-1.45)    |
| Nicotine                  | 1.00 (0.91-1.10) | 1.01 (0.92-1.11) | 1.05 (0.91-1.22) | 1.07 (0.92-1.24) | 1.04 (0.88-1.22) | 1.08 (0.91-1.28) | 0.92 (0.71-1.20) | 0.96 (0.73-1.25)    |
| Stop smoking advice       | 1.08 (1.04-1.12) | 1.12 (1.08-1.16) | 1.19 (1.13-1.26) | 1.23 (1.17-1.30) | 1.28 (1.20-1.35) | 1.32 (1.25-1.40) | 1.65 (1.51-1.79) | 1.74 (1.60-1.90)    |
| Weight advice/referral    | 1.50 (1.45-1.55) | 2.14 (2.07-2.22) | 2.84 (2.73-2.95) | 3.98 (3.81-4.16) | 4.21 (4.04-4.40) | 5.69 (5.42-5.98) | 8.36 (7.89-8.86) | 14.33 (13.31-15.43) |

|   |                          |                  |                  |                  |                  |                  |                  |                  |                  |
|---|--------------------------|------------------|------------------|------------------|------------------|------------------|------------------|------------------|------------------|
| 1 | Anti-obesity             | 1.06 (0.88-1.26) | 1.06 (0.88-1.27) | 1.11 (0.85-1.44) | 1.11 (0.85-1.44) | 1.09 (0.83-1.44) | 1.08 (0.82-1.42) | 1.00 (0.68-1.48) | 1.00 (0.68-1.49) |
| 2 | CVD>10% and statin       | 1.12 (1.03-1.21) | 1.35 (1.24-1.48) | 1.27 (1.12-1.43) | 1.49 (1.31-1.70) | 1.78 (1.54-2.07) | 1.90 (1.63-2.21) | 2.90 (2.36-3.57) | 3.27 (2.63-4.06) |
| 3 | CVD>20% and statin       | 1.03 (0.92-1.15) | 1.25 (1.11-1.42) | 1.07 (0.90-1.28) | 1.28 (1.06-1.54) | 1.58 (1.29-1.94) | 1.67 (1.36-2.06) | 2.60 (1.92-3.52) | 2.95 (2.15-4.04) |
| 4 | HTN and antihypertensive | 1.04 (0.98-1.10) | 1.04 (0.98-1.10) | 1.06 (0.97-1.15) | 1.05 (0.96-1.14) | 1.11 (1.02-1.21) | 1.11 (1.02-1.21) | 1.33 (1.18-1.50) | 1.33 (1.18-1.50) |

8 Body mass index (BMI), total cholesterol (TC), cardiovascular disease (CVD), systolic blood pressure (SBP), diastolic blood pressure (DBP), atrial fibrillation (AF), chronic kidney disease (CKD), hypertension (HTN)

13 Table 4 shows demographics of participants in cohort 4 that were eligible at the beginning of their invitation year stratified according to national IMD quintile. There was a disproportionately high number of participants in the least deprived quintile, which reflected the affluence of the study area compared to the national average. The proportion attending a HC was also highest in this quintile. Table 5 shows ORs for outcomes in invited cohort 4, with reference to uninvited cohort 5, stratified according to national IMD quintile. The effects of IMD were significant (at the p=0.05 level) between IMD and detection of: 10 year CVD risk >10%, SBP >140 or DBP > 90 mmHg, BMI >30 kg/m<sup>2</sup>, TC >5.5 mmol/L and TC >7.5 mmol/L as well as weight advice / referral.

25 **Table 4.** Numbers of participants and proportions of males and HC attendees in cohort 4 according to national IMD quintile, wherein quintile 5 is the least deprived.

|                  | Q1   | Q2   | Q3    | Q4    | Q5    |
|------------------|------|------|-------|-------|-------|
| 28 n             | 3775 | 9083 | 10792 | 15098 | 30238 |
| 29 % male        | 50.8 | 49.5 | 47.5  | 46.4  | 45.8  |
| 30 % attended HC | 24.1 | 26.7 | 32.9  | 37.2  | 40.7  |

33 Quintile (Q – 1 = most deprived, 5 = least deprived), n (number of participants), HC (health check)

36 **Table 5** Age and gender adjusted odds ratios with 95% confidence intervals for associations between invitation for an NHS health check and the detection of CVD risk factors, new diagnoses and interventions. Results are shown for invited cohort 4, with reference to uninvited cohort 5, stratified according to IMD quintile, wherein quintile 5 is the least deprived. The outcomes with a significant interaction (p<0.05) with IMD are shown in bold.

| DETECTION                  | Q1                      | Q2                      | Q3                      | Q4                      | Q5                       |
|----------------------------|-------------------------|-------------------------|-------------------------|-------------------------|--------------------------|
| 41 <b>CVD risk &gt;10%</b> | <b>3.02 (2.14-4.28)</b> | <b>6.15 (4.78-7.90)</b> | <b>7.82 (6.21-9.84)</b> | <b>7.99 (6.67-9.58)</b> | <b>9.67 (8.49-11.03)</b> |
| 42 CVD risk >20%           | 3.99 (1.88-8.48)        | 5.30 (3.11-9.01)        | 6.96 (4.05-11.96)       | 7.21 (4.63-11.21)       | 5.56 (4.22-7.33)         |

|                                        |                         |                         |                         |                         |                           |
|----------------------------------------|-------------------------|-------------------------|-------------------------|-------------------------|---------------------------|
| <b>SBP &gt;140 or DBP &gt; 90 mmHg</b> | <b>1.36 (1.13-1.63)</b> | <b>1.45 (1.30-1.63)</b> | <b>1.57 (1.42-1.74)</b> | <b>1.70 (1.56-1.85)</b> | <b>1.71 (1.61-1.82)</b>   |
| Current smoker                         | 1.17 (1.06-1.30)        | 1.16 (1.08-1.25)        | 1.25 (1.16-1.35)        | 1.25 (1.17-1.35)        | 1.25 (1.18-1.33)          |
| <b>BMI &gt;30 kg/m<sup>2</sup></b>     | <b>1.59 (1.36-1.86)</b> | <b>1.96 (1.75-2.20)</b> | <b>2.12 (1.91-2.36)</b> | <b>1.93 (1.75-2.12)</b> | <b>2.24 (2.08-2.41)</b>   |
| <b>TC &gt;5.5 mmol/L</b>               | <b>2.41 (2.02-2.87)</b> | <b>3.01 (2.67-3.39)</b> | <b>3.37 (3.04-3.74)</b> | <b>3.76 (3.43-4.11)</b> | <b>4.30 (4.03-4.59)</b>   |
| <b>TC &gt;7.5 mmol/L</b>               | <b>1.10 (0.63-1.93)</b> | <b>3.47 (2.10-5.75)</b> | <b>2.09 (1.44-3.03)</b> | <b>3.55 (2.44-5.16)</b> | <b>3.39 (2.66-4.34)</b>   |
| DIAGNOSES                              |                         |                         |                         |                         |                           |
| HTN                                    | 1.65 (1.04-2.62)        | 1.22 (0.92-1.61)        | 1.43 (1.12-1.82)        | 1.23 (0.99-1.54)        | 1.34 (1.14-1.57)          |
| AF                                     | 1.77 (0.29-10.65)       | 0.56 (0.19-1.64)        | 1.08 (0.50-2.30)        | 0.98 (0.50-1.92)        | 1.08 (0.65-1.79)          |
| CKD                                    | NA*                     | 3.36 (0.35-32.44)       | 0.67 (0.20-2.31)        | 0.48 (0.12-1.86)        | 0.37 (0.10-1.36)          |
| Diabetes                               | 1.32 (0.72-2.45)        | 1.29 (0.83-2.01)        | 1.02 (0.67-1.55)        | 1.15 (0.74-1.78)        | 1.74 (1.27-2.37)          |
| INTERVENTIONS                          |                         |                         |                         |                         |                           |
| Statin                                 | 1.46 (1.00-2.12)        | 1.39 (1.06-1.82)        | 1.37 (1.06-1.77)        | 1.50 (1.19-1.89)        | 1.76 (1.48-2.09)          |
| Anti-hypertensive                      | 1.20 (0.90-1.60)        | 1.17 (0.95-1.43)        | 1.19 (0.99-1.43)        | 1.14 (0.96-1.35)        | 1.13 (1.00-1.27)          |
| Antiglycaemics                         | 1.15 (0.60-2.22)        | 1.05 (0.65-1.69)        | 1.04 (0.66-1.63)        | 1.04 (0.63-1.70)        | 1.44 (1.03-2.00)          |
| Nicotine replace                       | 1.54 (0.75-3.17)        | 0.54 (0.28-1.03)        | 1.14 (0.63-2.08)        | 0.63 (0.36-1.09)        | 1.31 (0.75-2.28)          |
| Stop smoking advice                    | 1.84 (1.33-2.54)        | 1.46 (1.18-1.81)        | 1.48 (1.23-1.79)        | 1.62 (1.34-1.95)        | 1.82 (1.58-2.10)          |
| <b>Weight advice/referral</b>          | <b>4.48 (3.60-5.59)</b> | <b>6.42 (5.47-7.53)</b> | <b>7.68 (6.63-8.89)</b> | <b>8.17 (7.21-9.25)</b> | <b>10.21 (9.32-11.18)</b> |
| Anti-obesity                           | 0.82 (0.29-2.32)        | 0.56 (0.21-1.48)        | 0.95 (0.44-2.05)        | 1.09 (0.45-2.62)        | 2.16 (0.87-5.36)          |
| CVD risk >10% and statin               | 1.14 (0.48-2.70)        | 3.32 (1.94-5.66)        | 2.53 (1.52-4.20)        | 3.00 (1.90-4.71)        | 3.24 (2.34-4.49)          |
| CVD risk >20% and statin               | 1.49 (0.45-4.96)        | 3.12 (1.52-6.41)        | 2.20 (1.00-4.85)        | 3.25 (1.55-6.81)        | 2.57 (1.63-4.05)          |
| HTN and anti-hypertensive              | 1.35 (0.77-2.35)        | 1.35 (0.97-1.87)        | 1.21 (0.91-1.60)        | 1.26 (0.96-1.65)        | 1.41 (1.17-1.70)          |

\*Insufficient data, Quintile (Q – 1 = most deprived, 5 = least deprived), body mass index (BMI), total cholesterol (TC), cardiovascular disease (CVD), systolic blood pressure (SBP), diastolic blood pressure (DBP), atrial fibrillation (AF), chronic kidney disease (CKD), hypertension (HTN)

## **DISCUSSION**

1  
2  
3 This study evaluated the NHS HC programme in Hampshire from its implementation in April 2011 until March 2015. HC  
4 attendance following invitation increased year on year and as of 2015 was 30%. Attendees were older, from less  
5 deprived backgrounds and less likely to be male than those who were invited but chose not to attend. A significant  
6 finding was the large increase of up to 17.5% in the proportion of patients with measurements of TC among HC invited  
7 cohorts compared to non-invited. As might be expected, this led to large increases in detection of elevated TC >5.5  
8 mmol/L and CVD risk >10%, as well as TC >7.5 mmol/L and CVD risk >20%. Notwithstanding, there were only modest  
9 increases in detection plus treatment with statins. Explanations for this might include guidance during the study period  
10 recommending statins for CVD risk >20%, whereas the largest increased was in detection of CVD risk > 10%.  
11 Nonetheless, even among those with CVD risk >20% only 36.5%-40.7% (range for the invited cohorts) of participants  
12 were prescribed statins. This is substantially lower than the 85% used in modelling studies by the Department of  
13 Health.[5] In the uninvited group, rates of statin prescriptions following identification of CVD risk >20% were slightly  
14 higher (41.9%), but still lower than expected. Accordingly, there may be a more general issue relating to the step up  
15 from risk factor identification to diagnosis, and from diagnosis to treatment across general practice that would represent  
16 a missed opportunity at a population level for primary prevention of CVD. More specifically to the HC, there is a lack of  
17 a defined follow-up pathway following identification of increased 10-year CVD risk. Public Health England commissions  
18 and pays for the HC itself but follow-up is then a cost to General Practices which maybe a barrier.

19  
20  
21  
22  
23  
24  
25  
26  
27  
28  
29  
30  
31  
32  
33  
34  
35  
36  
37  
38  
39  
40  
41  
42  
43  
44  
45  
46  
47  
48  
49  
50  
51  
52  
53  
54  
55  
56  
57  
58  
59  
60  
Statin prescription rates may have increased since the study period, as updated National Institute for Health and Care  
Excellence (NICE) guidance now recommends statins for CVD risk >10% and a recent large and well-publicised review  
reported a more favourable risk / benefit profile of statins than thought previously.[21] Statin prescription rates resulting  
from a HC may also be higher outside of Hampshire, as they are known to vary locally.[22]

Other notable findings of this study included increased detection of elevated BP among HC invited cohorts, as well as  
modest increases in new diagnoses of hypertension and treatment. Those attending HCs were more likely to be  
diagnosed with diabetes, but the corresponding increase in prescriptions of antiglycaemics did not reach significance.  
According to HC guidance, diabetes screening is performed only in those deemed "at risk" with BMI  $\geq 30$  kg/m<sup>2</sup> ( $\geq 25$   
kg/m<sup>2</sup> in non-white ethnic groups) or SBP or DBP above  $\geq 140$  mmHg or 90 mmHg. Data regarding the sensitivity of  
these criteria are limited, but one study in the United States reported that a BMI cut off of  $\geq 25$  kg/m<sup>2</sup> "would miss 36%  
of Asian Americans with newly diagnosed type 2 diabetes",[23] so the HC may also have missed cases.

There was no significant increase in new diagnoses of CKD. This was likely because kidney function tests were  
performed only in HC patients with SBP or DBP  $\geq 140$  mmHg or 90 mmHg. A formal diagnoses of CKD would have  
required a repeat blood test, something which would need to have been organised by the GP and agreed to by the  
patient.

1 The HC did not result in any significant increase in new diagnoses of AF. NICE Hypertension clinical guideline 127  
2 states that practitioners should manually palpate the pulse before measuring blood pressure.[24] However, this may not  
3 have been performed consistently or reliably during the HC. Manual palpation is not necessary with electronic  
4 sphygmomanometers, and any patient with an irregular pulse would have further required an electrocardiogram (ECG)  
5 to diagnose AF.  
6  
7

8  
9  
10 There were increases in detection of smokers and BMI >30 kg/m<sup>2</sup>, as well as corresponding increases in lifestyle advice  
11 / referrals, particularly for high BMI. However, there was no significant difference in NRT or anti-obesity medications.  
12

13  
14 The HC had lower positive predictive values (or yield) for detection of risk factors than checks performed  
15 opportunistically. Most notably, lower proportions of CVD risk scores measured during the HC were >10% (-11.5% -  
16 -2.9%) and >20% (-6.1% - -1.8%). This may have been because GPs targeted opportunistic checks at those who were  
17 already symptomatic or because HC attendees were healthier with a lower prevalence of risk factors. A recent cohort  
18 study of 18 general practices in South London also found that participants taking up an opportunistic HC were at higher  
19 CVD risk (17% of invited HC and 22% of opportunistic HC with CVD risk score ≥10%), and that in younger adults in  
20 more deprived areas the opportunistic HC constituted a higher proportion of all HC performed. It was concluded that  
21 GPs were successfully targeting groups at higher risk who may otherwise face barriers to attendance at a pre-arranged  
22 HC.[25]  
23  
24  
25  
26  
27  
28  
29  
30  
31

32 In the final year of this study, uptake of the HC was highest among participants in the least deprived national IMD quintile  
33 (40.7%) and lowest in the most deprived (24.1%). There was evidence of better performance of the HC among less  
34 deprived participants for detection of 10-year CVD risk >10%, SBP >140 mmHg or DBP > 90 mmHg, BMI, TC >5.5  
35 mmol/L and TC >7.5 mmol/L and weight advice / referral. However, the precise effect of deprivation was difficult to  
36 estimate given the competing effects of differences in HC uptake (lowest in the most deprived quintile), the frequency  
37 of risk variable (highest in the most deprived quintile) and differing sample sizes (i.e. power to test / reject the null  
38 hypothesis). Primary care management may also have played a role, but the lack of difference by deprivation in  
39 prescribing rates in those detected suggests this was not a key factor.  
40  
41  
42  
43  
44  
45  
46  
47

48 Our findings build on existing evidence that attendees tend to be older, female and non-smokers.[16,26] The observation  
49 in this study that HC attendees were less likely to come from more deprived socioeconomic groups is reflected by some  
50 studies[27] though not others.[16,26]. Reasons for an inconsistent effect of deprivation are unclear, but may relate to  
51 local variation in targeting of high CVD risk individuals, who are overrepresented in more deprived groups. An example  
52 of such targeting was reported by a study in East London, which found no effect of deprivation, where GP practices  
53 were paid more for HCs that involved detection of higher CVD risk scores.[22] In Hampshire, including the cities of  
54 Southampton and Portsmouth, there was no clear incentive to detect high CVD risk nor specific targeting of deprived  
55 communities.  
56  
57  
58  
59  
60



1 Earlier studies report associations between HC attendance and increased recording and detection of CVD risk factors  
2 and use of interventions[17]. It has also been shown that a year after completing a HC, attendees have modest but  
3 significant reductions in CVD risk scores, diastolic blood pressure, TC levels and lipid ratios.[18] However, Chang et al.  
4 [26] found that only a third of HC attendees with CVD risk scores > 20% go on to be prescribed statins, slightly lower  
5 than that observed in the present study (36.5%-40.7%). Reasons for low prescription rates among high-risk groups are  
6 unclear, but patient refusal might be important and requires further research. Similar to this study, Smith et al.[28]  
7 reported a limited effect of HC attendance on detection rates and treatment of diabetes which, as is explained above, is  
8 likely because measuring blood glucose or HBA1c is not a standard part of the HC.  
9

10 The increases in proportions of new prescriptions we observed were smaller than those found in two large previous  
11 matched studies.[17,26] This is to be expected given that those studies compared attendees vs. non-attendees, whereas  
12 we considered invitees vs. non-invitees. Given that not everybody invited for a HC will attend, our approach is more  
13 likely to be representative of the effect of the HC programme overall.  
14

15 Strengths of this study included the biggest sample size to date for a HC study comprising 277,274 patients invited for  
16 a HC and 88,731 patients who were not. It is the first HC study to employ a quasi-randomised method and an intention-  
17 to-treat analysis. Specifically, patients were allocated to either HC invited or non-invited groups according to their dates  
18 of birth. We were able to evaluate the HC programme at the level of invitation, which is advantageous compared to  
19 previous studies which compared attendance vs. non-attendance. There were also weaknesses in our methods. First,  
20 our follow-up periods were short, varying from an average of six months (cohort 4) to 3.5 years (cohort 1). Process  
21 outcomes may have occurred after the end of follow-up, particularly in the case of new treatments that may have required  
22 further appointments and monitoring (e.g. for new prescriptions of antihypertensive). In addition, we were unable to  
23 observe clinically important outcomes, such as incident cardiovascular disease. For every 100 people invited for a HC  
24 in 2012/13, an extra one person was prescribed a statin. Based on a literature reported number needed to treat (NNT)  
25 for primary prevention of cardiovascular events,[29] one event may be prevented for every 560 people invited for a HC,  
26 but this estimation does not account for duration of treatment or adherence. Improving NNTs would require greater  
27 uptake of the HC and / or greater prescribing among those with identified CVD risk. A second limitation of our study was  
28 that we were missing all data including at baseline for an unknown number of patients who died during the follow-up,  
29 which was a consequence of how our data source, the HHRA, was organised. These deaths will selectively have  
30 reduced numbers of those at highest risk from our population. They will tend to have been in poorer and higher risk  
31 groups and, therefore, less likely to attend a HC. The numbers would have been balanced between the cohorts, so  
32 should not have affected our between-cohort comparisons. However, they might have reduced the overall risk profile,  
33 and differentially within cohorts favour attendance. A third limitation was contamination bias, as some patients in the  
34 uninvited group attended a HC. Contamination was largely inevitable given advertising and public awareness of the HC  
35 and given that all included GP practices were involved in delivering the programme. Contamination likely led to an

1 underestimation of the effectiveness of the HC programme in our study. Fourth, we had limited details on some factors,  
2 including diet and alcohol intake, and non-medical interventions, such as lifestyle advice. Lifestyle advice may have  
3 ranged from brief general advice to individually tailored advice with subsequent follow-up. However, such variation likely  
4 had a small effect on our results given an earlier study that reported a lack of an association between the intensity of  
5 lifestyle advice as part of a HC and related CVD risk reduction.[30] Fifth, there were potential coding errors or omissions  
6 by GPs in recording attendance, measurements, diagnoses and interventions. This may have been particularly  
7 problematic for cohort 1 because Read Codes for HC completion were only released in 2012, after the start of the  
8 invitation year. Failure of GPs to code attendance retrospectively (i.e. once the Read Codes were available) may, in  
9 part, explain, why there was lower recorded HC attendance in cohort 1 compared to the other cohorts. Otherwise, coding  
10 errors would have affected the intervention and non-intervention groups equally. Sixth, we missed data on HC  
11 undertaken in community pharmacies and other non-GP settings though this was a small minority. Our population was  
12 not necessarily representative of the UK, and we had no data on ethnicity. Hampshire does comprise significant urban,  
13 suburban and rural populations, but the proportion of ethnic minorities is lower than the national average and this may  
14 limit the generalisability of our results. Seventh, we excluded around 35% of the eligible population. This was because  
15 of problems with the invitation system, missing DOBs, Read Codes not formatted according to Version 2 and unknown  
16 invitation status for some participants (e.g. because of moving into the study area after the start of the follow-up period).  
17 However, these exclusions would have been equal across the cohorts. Finally, our study period ended in 2015, and  
18 clinical guidance as well as engagement by GPs and patients with the HC programme may have changed since then.

19 In conclusion, this study evaluated the NHS HC programme and showed that participation increased year on year  
20 between 2011 and 2015. The HC programme resulted in large increases in the detection of patients with CVD risk  
21 factors, particularly raised cholesterol and 10-year CVD risk scores >10%. There were corresponding, albeit smaller,  
22 increases in certain evidence based medical therapies, most notably statins. However, rates of uptake, diagnosis and  
23 treatment were well below those expected by the Department of Health.[5] Future work should focus on improving  
24 uptake, including through use of non-GP settings (e.g. pharmacy etc.)[31] and by better communication of the  
25 programme[32,33] and invitation methods driven by behavioural insights.[34] Further support is also required in decision  
26 making for patients and GPs following identification of new risk factors as part of the NHS HC, potentially including  
27 incentivisation (e.g. payment by results). Finally, further studies are needed to assess the longer-term effects of the HC  
28 on clinical outcomes and health inequalities.

## 29 **Acknowledgements**

30 The authors thank NHS South, Central and West Commissioning Support Unit and the Care and Health Information  
31 Exchange Information Governance Group for their support, and for provision of access to CHIA (formerly known as  
32 HHRA) data.



## Figures

**Figure 1.** Derivation of the study population and five cohorts included in this study. Cohorts 1-4 were invited for HCs in the years beginning 1<sup>st</sup> April 2011, 12, 13 and 14 respectively, while cohort 5, which was the control group, was not invited.

**Figure 2.** Histograms showing the distribution of ages within the five cohorts.

## References

1. GBD 2017 Disease and Injury Incidence and Prevalence Collaborators. Global, regional, and national incidence, prevalence, and years lived with disability for 354 diseases and injuries for 195 countries and territories, 1990-2017: a systematic analysis for. *Lancet* (London, England). 2018 Nov;392(10159):1789–858.
2. Bhatnagar P, Wickramasinghe K, Williams J, et al. The epidemiology of cardiovascular disease in the UK 2014. *Heart*. 2015 Aug;101(15):1182–9.
3. Smith ER. The Canadian heart health strategy and action plan. Vol. 25, *The Canadian journal of cardiology*. England; 2009. p. 451–2.
4. Frieden TR, Berwick DM. The “Million Hearts” initiative--preventing heart attacks and strokes. *N Engl J Med*. 2011 Sep;365(13):e27.
5. Department of Health. *Economic Modelling for Vascular Checks*. London. Department of Health, 2008.
6. Mytton OT, Jackson C, Steinacher A, et al. The current and potential health benefits of the National Health Service Health Check cardiovascular disease prevention programme in England: A microsimulation study. *PLoS Med*. 2018 Mar;15(3):e1002517.
7. NHS Health Check Best practice guidance. Public Health England. March 2016. Available from: <http://www.healthcheck.nhs.uk/> (accessed 2/12/17).
8. Krogsboll LT, Jorgensen KJ, Gotzsche PC. Universal health checks should be abandoned. Vol. 347, *BMJ* (Clinical research ed.). England; 2013. p. f5227.
9. Capewell S, McCartney M, Holland W. NHS Health Checks--a naked emperor? *J Public Health (Oxf)*. 2015 Jun;37(2):187–92.
10. Krogsboll LT, Jorgensen KJ, Gronhoj Larsen C, et al. General health checks in adults for reducing morbidity and mortality from disease. *Cochrane database Syst Rev*. 2012 Oct;10:CD009009.
11. Dalton ARH, Bottle A, Okoro C, et al. Uptake of the NHS Health Checks programme in a deprived, culturally diverse setting: cross-sectional study. *J Public Health (Oxf)*. 2011 Sep;33(3):422–9.
12. Nicholas JM, Burgess C, Dodhia H, et al. Variations in the organization and delivery of the “NHS health check” in primary care. *J Public Health (Oxf)*. 2013 Mar;35(1):85–91.
13. Jenkinson CE, Asprey A, Clark CE, et al. Patients’ willingness to attend the NHS cardiovascular health checks in primary care: a qualitative interview study. *BMC Fam Pract*. 2015 Mar;16:33.
14. Waterall J, Greaves F, Gresser C, et al. Response to Capewell et al. *J Public Health (Oxf)*. 2015 Jun;37(2):193–4.
15. Martin A, Saunders CL, Harte E, et al. Delivery and impact of the NHS Health Check in the first 8 years: a systematic review. *Br J Gen Pract*. 2018 Jul;68(672):e449–59.
16. Robson J, Dostal I, Sheikh A, et al. The NHS Health Check in England: an evaluation of the first 4 years. *BMJ Open*. 2016 Jan;6(1):e008840.
17. Forster AS, Burgess C, Dodhia H, et al. Do health checks improve risk factor detection in primary care? Matched cohort study using electronic health records. *J Public Health (Oxf)*. 2016 Sep;38(3):552–9.
18. Artac M, Dalton ARH, Majeed A, et al. Effectiveness of a national cardiovascular disease risk assessment program (NHS Health Check): results after one year. *Prev Med (Baltim)*. 2013 Aug;57(2):129–34.
19. Lefebvre C, Manheimer E, Glanville J. Box 6.3.a: Cochrane definitions and criteria for randomized controlled trials (RCTs) and controlled clinical trials (CCTs). In: Higgins JPT, Green S (editors). *Cochrane Handbook for Systematic Reviews of Interventions*.
20. R Development Core Team (2008). *R: A language and environment for statistical computing*. R Foundation for Statistical Computing, Vienna, Austria. ISBN 3-900051-07-0, URL <http://www.R-project.org>.

21. Collins R, Reith C, Emberson J, et al. Interpretation of the evidence for the efficacy and safety of statin therapy. *Lancet* (London, England). 2016 Nov;388(10059):2532–61.
22. Robson J, Dostal I, Madurasinghe V, et al. The NHS Health Check programme: implementation in east London 2009-2011. *BMJ Open*. 2015 Apr;5(4):e007578.
23. Araneta MR, Kanaya A, Fujimoto W, et al. Optimum BMI cut-points to screen Asian Americans for type 2 diabetes. Poster presentation at American Diabetes Association 74th Scientific Sessions, 13–17 June 2014, San Francisco, CA.
24. NICE guidelines [CG127]. Available at: <https://www.nice.org.uk/guidance/cg127> (Accessed: 16 March 2018).
25. Gulliford MC, Khoshaba B, McDermott L, et al. Cardiovascular risk at health checks performed opportunistically or following an invitation letter. Cohort study. *J Public Health (Oxf)*. 2018 Jun;40(2):e151–6.
26. Chang KC-M, Soljak M, Lee JT, et al. Coverage of a national cardiovascular risk assessment and management programme (NHS Health Check): Retrospective database study. *Prev Med (Baltim)*. 2015 Sep;78:1–8.
27. Cochrane T, Gidlow CJ, Kumar J, et al. Cross-sectional review of the response and treatment uptake from the NHS Health Checks programme in Stoke on Trent. *J Public Health (Oxf)*. 2013 Mar;35(1):92–8.
28. Smith S, Waterall J, Burden ACF. An evaluation of the performance of the NHS Health Check programme in identifying people at high risk of developing type 2 diabetes. *BMJ Open*. 2013 Mar;3(3).
29. Taylor F, Huffman MD, Macedo AF, et al. Statins for the primary prevention of cardiovascular disease. In: Huffman MD, editor. *Cochrane Database of Systematic Reviews* [Internet]. Chichester, UK: John Wiley & Sons, Ltd; 2013 [cited 2017 Dec 3]. Available from: <http://doi.wiley.com/10.1002/14651858.CD004816.pub5>
30. Cochrane T, Davey R, Iqbal Z, et al. NHS health checks through general practice: randomised trial of population cardiovascular risk reduction. *BMC Public Health* [Internet]. 2012;12(1):944. Available from: <http://bmcpublichealth.biomedcentral.com/articles/10.1186/1471-2458-12-944>
31. Woringer M, Cecil E, Watt H, et al. Evaluation of community provision of a preventive cardiovascular programme - the National Health Service Health Check in reaching the under-served groups by primary care in England: cross sectional observational study. *BMC Health Serv Res*. 2017 Jun;17(1):405.
32. Usher-Smith JA, Harte E, MacLure C, et al. Patient experience of NHS health checks: a systematic review and qualitative synthesis. *BMJ Open*. 2017 Aug;7(8):e017169.
33. Riley R, Coghill N, Montgomery A, et al. Experiences of patients and healthcare professionals of NHS cardiovascular health checks: a qualitative study. *J Public Health (Oxf)*. 2016 Sep;38(3):543–51.
34. Sallis A, Bunten A, Bonus A, et al. The effectiveness of an enhanced invitation letter on uptake of National Health Service Health Checks in primary care: a pragmatic quasi-randomised controlled trial. *BMC Fam Pract* [Internet]. 2016;17(1):35. Available from: <https://doi.org/10.1186/s12875-016-0426-y>

### Declaration of competing interests

All authors have completed the ICMJE uniform disclosure form at [www.icmje.org/coi\\_disclosure.pdf](http://www.icmje.org/coi_disclosure.pdf) and declare: no support from any organisation for the submitted work; no financial relationships with any organisations that might have an interest in the submitted work in the previous three years; no other relationships or activities that could appear to have influenced the submitted work.

### Ethics approval

This study received ethical approval from the Research Ethics Committee at the University of Southampton ID: 24358) and approval from the Hampshire Health Record Information Governance Group.

### Contributorship

The corresponding author attests that all listed authors meet authorship criteria and that no others meeting the criteria have been omitted. OJK, FS, EW, RP and PR conceived and designed the study; FS performed the data acquisition from the Hampshire Health Record Database and OJK performed the data analysis; OJK and FS drafted the manuscript

1 which was reviewed and amended by all authors. All authors, external and internal, had full access to all of the data  
2 (including statistical reports and tables) in the study and can take responsibility for the integrity of the data and the  
3 accuracy of the data analysis. PR is guarantor.  
4

## 6 **Copyright**

8 The Corresponding Author has the right to grant on behalf of all authors and does grant on behalf of all authors, a  
9 worldwide licence to the Publishers and its licensees in perpetuity, in all forms, formats and media (whether known now  
10 or created in the future), to i) publish, reproduce, distribute, display and store the Contribution, ii) translate the  
11 Contribution into other languages, create adaptations, reprints, include within collections and create summaries, extracts  
12 and/or, abstracts of the Contribution, iii) create any other derivative work(s) based on the Contribution, iv) to exploit all  
13 subsidiary rights in the Contribution, v) the inclusion of electronic links from the Contribution to third party material where-  
14 ever it may be located; and, vi) licence any third party to do any or all of the above.  
15  
16  
17  
18  
19  
20  
21

## 23 **Funding**

24 This research received no specific grant from any funding agency in the public, commercial or not-for-profit sectors.  
25  
26

## 27 **Transparency declaration**

28 PR affirms that the manuscript is an honest, accurate, and transparent account of the study being reported; that no  
29 important aspects of the study have been omitted; and that any discrepancies from the study as planned (and, if relevant,  
30 registered) have been explained.  
31  
32  
33  
34  
35

## 36 **Data sharing**

37 Access to the data used in this study is administrated by the Care and Health Information Exchange (CHIE)  
38 Information Governance Group, which is managed by the South, Central and West Commissioning Support Unit on  
39 behalf of health and social care organisations in Hampshire, Farnham and the Isle of Wight.  
40  
41  
42  
43  
44  
45  
46  
47  
48  
49  
50  
51  
52  
53  
54  
55  
56  
57  
58  
59  
60

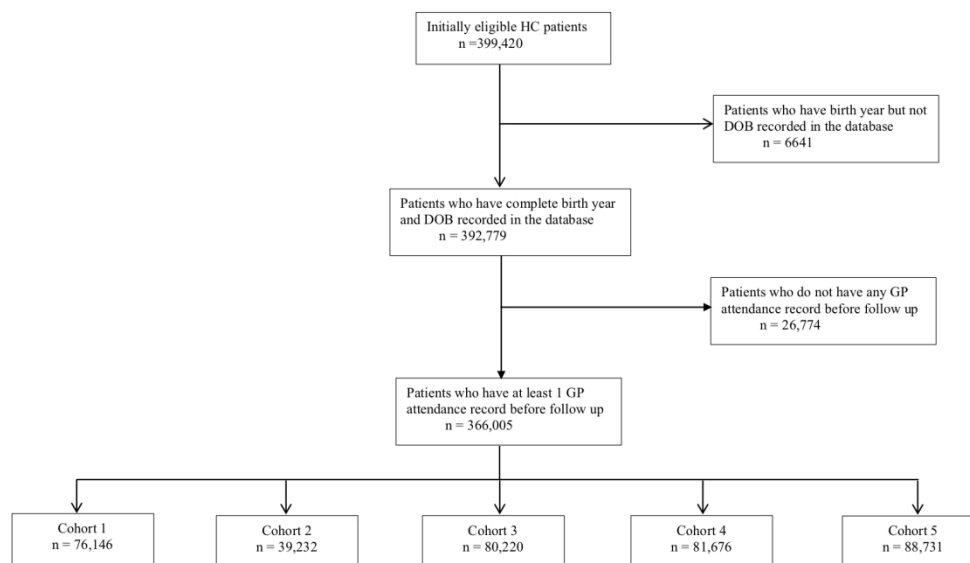

Figure 1. Derivation of the study population and five cohorts included in this study. Cohorts 1-4 were invited for HCs in the years beginning 1st April 2011, 12, 13 and 14 respectively, while cohort 5, which was the control group, was not invited.

146x83mm (300 x 300 DPI)

1  
2  
3  
4  
5  
6  
7  
8  
9  
10  
11  
12  
13  
14  
15  
16  
17  
18  
19  
20  
21  
22  
23  
24  
25  
26  
27  
28  
29  
30  
31  
32  
33  
34  
35  
36  
37  
38  
39  
40  
41  
42  
43  
44  
45  
46  
47  
48  
49  
50  
51  
52  
53  
54  
55  
56  
57  
58  
59  
60

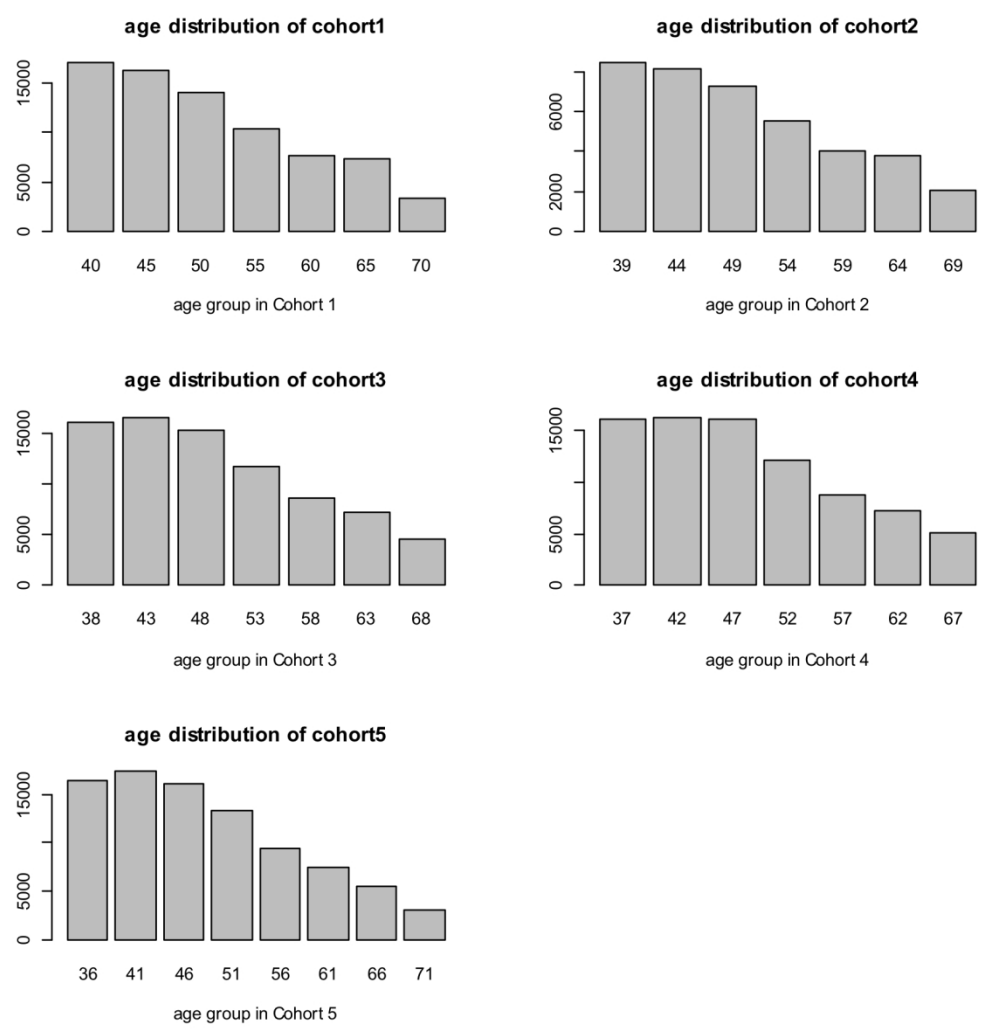

Figure 2. Histograms showing the distribution of ages within the five cohorts.

150x158mm (300 x 300 DPI)

# **Evaluating the Effectiveness of the NHS Health Check Programme in South England: a Quasi-Randomised Controlled Trial – supplementary materials**

O. J. Kennedy<sup>1</sup> \* (0000-0001-7907-9118), F. Su<sup>2</sup>, R. Pears<sup>3</sup>, E Walmsley<sup>1</sup>, P. Roderick<sup>1</sup>

1. Primary Care & Population Sciences Faculty of Medicine, University of Southampton, Southampton, UK

O. J. Kennedy, Visiting Research Fellow

E Walmsley, Public Health Registrar

P. Roderick, Professor of Public Health

2. NHS South, Central and West Commissioning Support Unit, Eastleigh, Hampshire, UK

F. Su, Principal Information Analyst

3. Public Health Directorate, Hampshire County Council, Hampshire, UK

R. Pears, Public Health Consultant

Read codes (5-byte version 2 Read codes, EMIS or BNF)

## NHS Health Check codes

8BAg NHS Health Check completed

EMISNQN6 NHS Health check completed

EMISNQN7 NHS Health check completed by practice

8BAg0 NHS Health Check completed by third party

## Blood pressure

Systolic blood pressure: ReadCode like '2469%' or ReadCode like '246Q%'

Diastolic blood pressure: ReadCode like '246A%' or ReadCode like '246R%'

246.. | O/E - blood pressure reading

246R. | Sitting diastolic blood pressure

246Q. | Sitting systolic blood pressure

## Body mass index

'22K2.', '22K1.', '22K4.', '22K5.', '22K6.', '22K7.', '22K8.', '22K9.', '22K90', '22KB.', '22K..', '22K3.'

## Total cholesterol

'44OE.' Plasma total cholesterol level

'44P..' Serum cholesterol

'44P1.' Serum cholesterol normal

'44P2.' Serum cholesterol borderline

'44P3.' Serum cholesterol raised

'44P4.' Serum cholesterol very high

'44PH.' Total cholesterol measurement

'44PJ.' Serum total cholesterol level

## 10-year risk of CVD disease

'662k%' (JBS CVD risk less than 10% over next ten years)

'662l%' (JBS CVD risk ten percent to 20% over next ten years)

'662m%' (JBS CVD risk greater than 20% up to 30% over next ten years)

'662n%' (JBS CVD risk greater than 30% over next ten years)  
 '38DP%' (QRISK2 cardiovascular disease 10 year risk score)  
 '38DF%' (QRISK cardiovascular disease 10 year risk score)  
 '38DR%' (Framingham 1991 cardiovascular disease 10 year risk score)

#### Current smoker

'137.', '1372.', '1373.', '1374.', '1375.', '1376.', '137b.', '137c.', '137C.', '137D.', '137d.', '137e.', '137E.', '137f.', '137G.', '137h.', '137H.', '137J.', '137m.', '137a.', '137X.', '137Y.', '137Z.', '137M.', '137n.', '137P.', '137Q.', '137R.', '137V.', '13p0.', '13p5.', '67H6.', '745H.', '8CAg.', '8CAL.', '8CdB.', '8H7i.', '8HBM.', '8HBP.', '8HkQ.', '8HTK.', '8I Aj.', '8IEK.', '8IEM.', '8IEo.', '8T08.', '9hG.', '9hG0.', '9hG1.', '9kc.', '9kc0.', '9kf1.', '9kf2.', '9ko.', '9N2k.', '9N4M.', '9Ndg.', '9NdZ.', '9OO.', '9OO1.', '9OO2.', '9OO3.', '9OO4.', '9OO5.', '9OO6.', '9OO7.', '9OO8.', '9OO9.', '9OO A.', '9OOB.', '9OOZ.', '13p50%', '745H0%', '745H%', '745H2%', '745H3%', '745H4%', '745Hy%', '745Hz%', '9 NS02%', '9OOB0%', '9OOB1%', '9OOB2%'

#### Ex smoker

'137K.', '137N.', '137O.', '137S.', '137T.', '13p4.', '1377.', '137l.', '9km.', '137j.', '1378.', '137F.', '137B.', '1379.', '137A.', '137L.', '137i.', '137K0%'

#### Non-smoker

'137L.'

#### Never smoking

'1371.'

#### Hypertension

QOFv28 - Hypertension  
 G2...  
 G20..%  
 G24.. - G2z.. (Excluding G24z1, G2400, G2410, G27..)  
 Gyu2.  
 Gyu20

#### Ischaemic heart disease

QOF v28 - Secondary Prevention of Coronary Heart Disease  
 G3... - G309.  
 G30B. - G330z (excluding G310.)  
 G33z. - G3401  
 G342. - G35X.  
 G38.. - G3z..  
 Gyu3.% (excluding Gyu31)

#### Diabetes

QOF v28 - Diabetes  
 C10.., C109J, C109K, C10C., C10D., C10E.%, C10F.% (Excluding C10F8), C10G.%, C10H.%, C10M.%, C10N.%, PKyP., C10P.%

#### CKD

QOF v28 - CKD  
 1Z12.  
 1Z13.  
 1Z14.  
 1Z15.  
 1Z16.  
 1Z1B. - 1Z1L.  
 K053.  
 K054.  
 K055.

#### AF

QOF v28 - AF

1  
2  
3 G573.% (excluding G5731, G5736)  
4

5 Heart Failure

6 QOF v28 – HF

7 G58..%

8 G1yz1

9 662f. – 662i.

10  
11 Atherosclerosis and other peripheral vascular disease

12 G70% Atherosclerosis

13 G73 Other peripheral vascular disease

14 G7310 Buerger's disease

15 G7311 Presenile gangrene

16 G731z Thromboangiitis obliterans NOS

17 G732% Peripheral gangrene

18 G733 Ischaemic foot

19 G73y Other specified peripheral vascular disease

20 G73y0 Diabetic peripheral angiopathy

21 G73yz Other specified peripheral vascular disease NOS

22 G73z Peripheral vascular disease NOS

23 G73z0 Intermittent claudication

24 G73zz Peripheral vascular disease NOS

25 Stroke and TIA

26 QOF v28 – Stroke and TIA

27 G61..% (excluding G617.)

28 G63y0 - G63y1

29 G64..%

30 G66..% (excluding G669.)

31 G6760

32 G6W..

33 G6X..

34 G65.- G654.

35 G656.- G65zz

36 Gyu62 – Gyu66

37 Gyu6F

38 Gyu6G

39 ZV12D

40 Fyu55

41 G619.

42 Additional circulatory system disease.

43 Gyu% Additional circulatory system disease classification terms

44 NOT Gyu0% Acute rheumatic fever

45 NOT Gyu1% Chronic rheumatic heart disease

46 NOT Gyu2% Hypertensive diseases

47 NOT Gyu8% Diseases of veins, lymphatic vessels and lymph nodes, not elsewhere classified

48 NOT Gyu9% Other and unspecified disorders of the circulatory system

49  
50 STATINS

51 bx% LIPID-LOWERING DRUGS

52 2.12 Lipid-regulating drugs (BNF)

53  
54 Antihypertensive

55 BNF\_Code 02.02.01.00, 02.02.02.00, 02.02.03.00, 02.04.00.00, 02.04.01.00, 02.05.04.00,

56 02.05.05.00, 02.05.05.01, 02.05.05.02, 02.06.02.00, TitleofGroup in ('Angiotensin-Converting Enzyme

57 Inhibitors','Calcium Channel Blockers','Angiotensin-II Receptor Antagonists','Potassium Sparing

58 Diuretics','Thiazides And Related Diuretics','Loop Diuretics','Alpha-Adrenoceptor Blocking



1  
2  
3 Drugs', 'Beta-Adrenoceptor Blocking Drugs', 'Compound Beta-Adrenoceptor Blocking Drugs', 'Drugs  
4 Affecting The Renin-Angiotensin System')

5  
6 Anti-obesity

7 aw...

8  
9  
10 Anti-diabetes

11 BNF code 06.01.00.00, and titleofGroup is : Drugs Used In Diabetes

12  
13 Nicotine replacement

14 BNF\_Code 04.10.00.00, 04.10.02.00

15  
16 K: Palliative care

17 1Z01 Terminal illness - late stage  
18 2JE Last days of life  
19 8BA2 Terminal care  
20 8BAP Specialist palliative care  
21 8BAS Specialist palliative care treatment - daycare  
22 8BAT Specialist palliative care treatment - outpatient  
23 8BAe Anticipatory palliative care  
24 8BJ1 Palliative treatment  
25 8CM1% On gold standards palliative care framework  
26 8CM4 Liverpool care pathway for the dying  
27 8CME Has end of life advanced care plan  
28 8H6A Refer to terminal care consult  
29 8H7L Refer for terminal care  
30 8H7g Referral to palliative care service  
31 8HH7 Referred to community specialist palliative care team  
32 9EB5 DS 1500 Disability living allowance (terminal care) completed  
33 9Ng7 On end of life care register  
34 ZV57C Palliative care

35 Previous health checks and CVD risk assessments

36  
37 38B1 Vascular disease risk assessment  
38 38B10 CVD (cardiovascular disease) risk assessment by third party  
39 66f Cardiovascular disease monitoring  
40 66f0 Cardiovascular disease annual review  
41 66f1 Cardiovascular disease interim monitoring  
42 66f2 Cardiovascular disease high risk review  
43 8BAg NHS Health Check completed  
44 9OhA Cardiovascular disease risk assessment done  
45 8BAg0 NHS Health Check completed by third party  
46  
47  
48  
49  
50  
51  
52  
53  
54  
55  
56  
57  
58  
59  
60

**Table 1.** Comparison of proportions of participants with risk factor recording / detection, new diagnoses and new interventions in each of the four invited cohorts vs. uninvited cohort 5.

|                                                  | C1 vs<br>C5 (p-<br>value) | C2 vs<br>C5 (p-<br>value) | C3 vs<br>C5 (p-<br>value) | C4 vs<br>C5 (p-<br>value) |
|--------------------------------------------------|---------------------------|---------------------------|---------------------------|---------------------------|
| <b>RECORDING %</b>                               |                           |                           |                           |                           |
| BP                                               | <0.001                    | <0.001                    | <0.001                    | <0.001                    |
| BMI                                              | <0.001                    | <0.001                    | <0.001                    | <0.001                    |
| TC                                               | <0.001                    | <0.001                    | <0.001                    | <0.001                    |
| CVD risk                                         | <0.001                    | <0.001                    | <0.001                    | <0.001                    |
| Smoking status                                   | <0.001                    | <0.001                    | <0.001                    | <0.001                    |
| <b>DETECTION %</b>                               |                           |                           |                           |                           |
| CVD risk >10%                                    | <0.001                    | <0.001                    | <0.001                    | <0.001                    |
| % of CVD risk recorded with >10%                 | <0.001                    | <0.001                    | <0.001                    | <0.001                    |
| CVD risk >20%                                    | <0.001                    | <0.001                    | <0.001                    | 0.392                     |
| % of CVD risk recorded with >20%                 | <0.001                    | <0.001                    | <0.001                    | <0.001                    |
| SBP >140 or DBP > 90 mmHg                        | <0.001                    | <0.001                    | <0.001                    | <0.001                    |
| % of BP recorded with >140 or >90                | <0.001                    | 0.911                     | 0.804                     | 0.009                     |
| Current smoker                                   | 0.170                     | 0.475                     | 0.826                     | 0.013                     |
| % of smoking status recorded who currently smoke | <0.001                    | <0.001                    | <0.001                    | <0.001                    |
| BMI >30 kg/m <sup>2</sup>                        | <0.001                    | <0.001                    | <0.001                    | <0.001                    |
| % BMI recoded with >30                           | <0.001                    | <0.001                    | <0.001                    | <0.001                    |
| TC >5.5 mmol/L                                   | <0.001                    | <0.001                    | <0.001                    | <0.001                    |
| % of TC recorded with >5.5 mmol/L                | 0.005                     | 0.002                     | <0.001                    | <0.001                    |
| TC >7.5 mmol/L                                   | <0.001                    | <0.001                    | <0.001                    | <0.001                    |
| % of TC recorded with >7.5 mmol/L                | 0.584                     | 0.005                     | <0.001                    | <0.001                    |
| <b>DIAGNOSES %</b>                               |                           |                           |                           |                           |
| Hypertension                                     | <0.001                    | <0.001                    | 0.003                     | <0.001                    |

|                                                       |        |        |        |        |
|-------------------------------------------------------|--------|--------|--------|--------|
| % of SBP >140 or DBP > 90 with hypertension diagnosis | <0.001 | 0.148  | 0.271  | 0.007  |
| AF                                                    | <0.001 | 0.855  | 0.012  | 0.783  |
| CKD                                                   | 0.118  | 0.040  | 0.443  | 0.741  |
| Diabetes                                              | 0.129  | 0.624  | 0.065  | 0.015  |
| <b>INTERVENTIONS %</b>                                |        |        |        |        |
| Statin                                                | <0.001 | <0.001 | <0.001 | 0.017  |
| % of CVD>10% prescribed statins                       | <0.001 | <0.001 | <0.001 | <0.001 |
| % of CVD>20% prescribed statins                       | <0.001 | <0.001 | <0.001 | <0.001 |
| Antihypertensive                                      | <0.001 | <0.001 | 0.077  | 0.205  |
| % of hypertensives prescribed antihypertensive        | 0.450  | 0.415  | 0.711  | 0.003  |
| Antiglycaemics                                        | 0.515  | 0.192  | 0.957  | 0.481  |
| % of diabetics prescribed antiglycaemics              | <0.001 | <0.001 | <0.001 | <0.001 |
| NRT                                                   | 0.405  | 0.757  | 0.789  | 0.881  |
| % of current smokers prescribed NRT                   | 0.400  | 0.552  | 0.370  | 0.397  |
| Stop smoking advice                                   | 0.003  | <0.001 | <0.001 | <0.001 |
| % of current smokers given advice                     | 0.010  | <0.001 | 0.035  | 0.024  |
| Weight advice/referral                                | <0.001 | <0.001 | <0.001 | <0.001 |
| % of BMI>30 kg/m <sup>2</sup> given advice/referral   | <0.001 | <0.001 | <0.001 | <0.001 |
| Anti-obesity                                          | 0.503  | 0.491  | 0.893  | 0.708  |
| % of BMI>30 kg/m <sup>2</sup> prescribed anti-obesity | 0.002  | 0.398  | <0.001 | <0.001 |

Attended (Att), Blood pressure (BP), body mass index (BMI), total cholesterol (TC), cardiovascular disease (CVD), systolic blood pressure (SBP), diastolic blood pressure (DBP), atrial fibrillation (AF), chronic kidney disease (CKD), Nicotine replacement therapy (NRT)
